# Supplementary material
Source: publisher figshare collection journal article supplement (https://acs.figshare.com/ndownloader/files/4616293)
Supplement: Supplementary file 1 [file 4616293]

## **Supporting Information**

### **Inhibitors of Src Homology-2 Domain containing Protein Tyrosine Phosphatase-2 (Shp2) Based on Oxindole Scaffolds**

Harshani R. Lawrence,\* Roberta Pireddu, Liwei Chen, Yunting Luo, Shen-Shu Sung, Ann Marie Szymanski, Richard Yip, Wayne C. Guida, Saïd M. Sebtì, Jie Wu and Nicholas J. Lawrence\*

*Moffitt Cancer Center, Tampa, FL*

#### **Contents.**

Characterization data, mass and NMR spectra and HPLC traces of compounds **5** (NSC-117199), **10a-r**, **14a-b**, **17** and **18a-e**, nOe and COSY data for **5** and **18c**, and a description of the molecular modeling studies.

**5 (NSC-117199)**

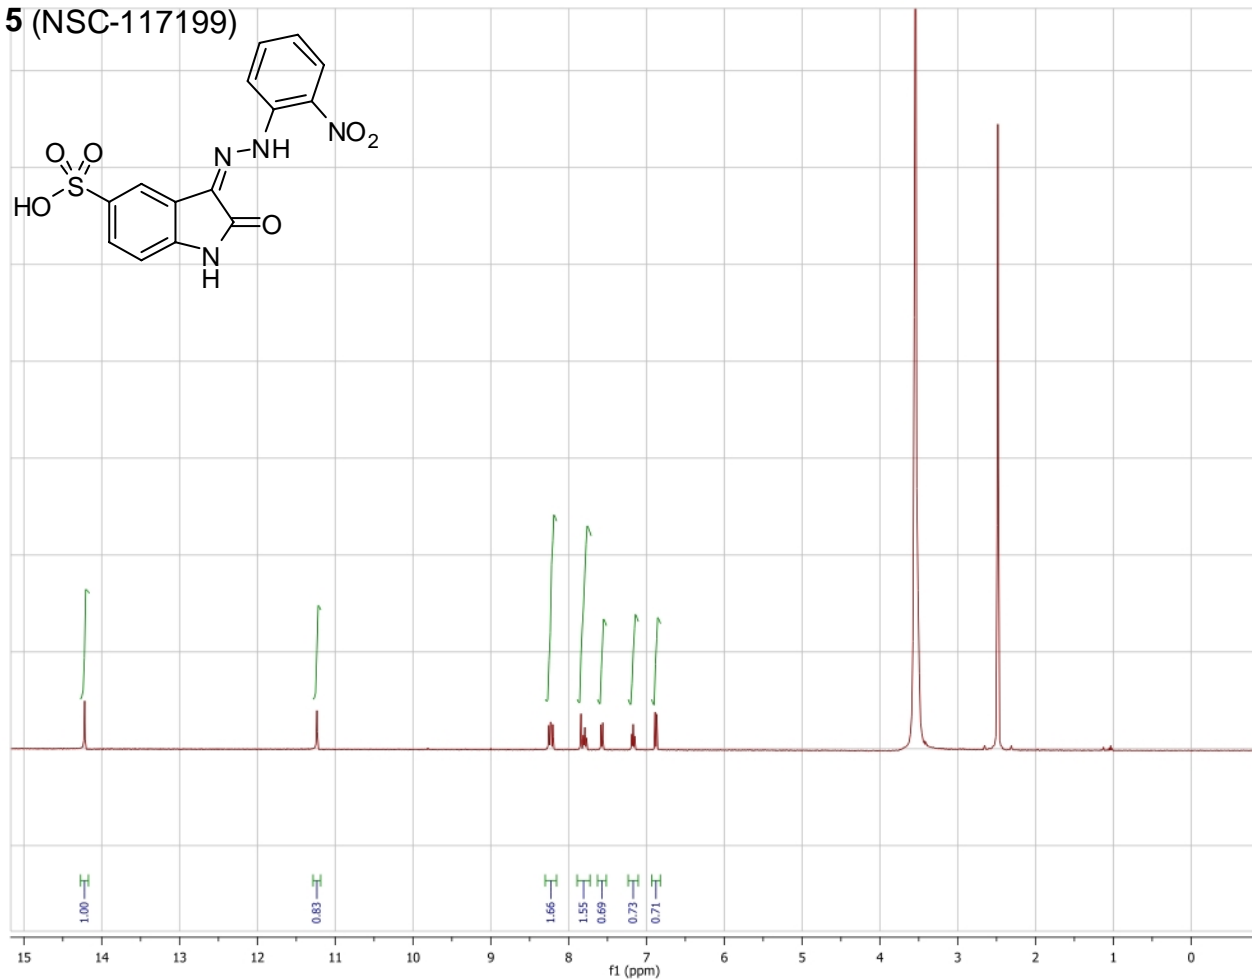

**Expansion of the <sup>1</sup>H NMR (DMSO-*d*<sub>6</sub>) spectrum of 5 (NSC-117199) (δ 6.8 – 8.3 ppm)**

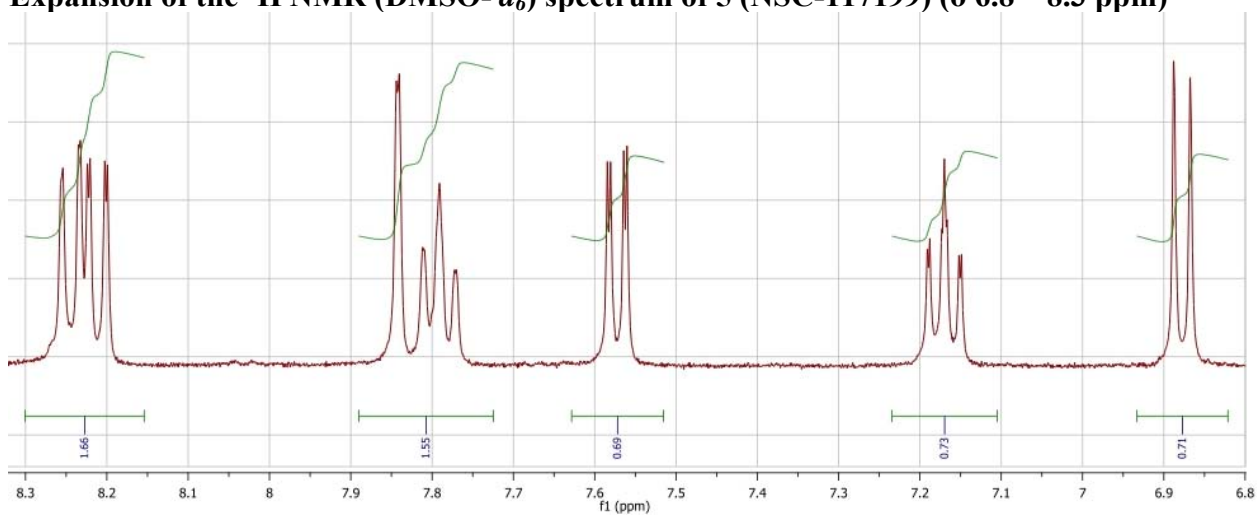

HPLC of 5 (NSC-117199)

Area Percent Report

data\harshan\HL1-056\System7-10-2007 4-24-59 PM.dat  
Acquired: 7/10/2007 4:26:57 PM

Page 1 of 1 Data File: C:\HPLC  
Printed: 7/10/2007 5:02:22 PM

Analyst: System  
Sample ID: HL1-056  
Vial: N/A  
Injection Volume: 0

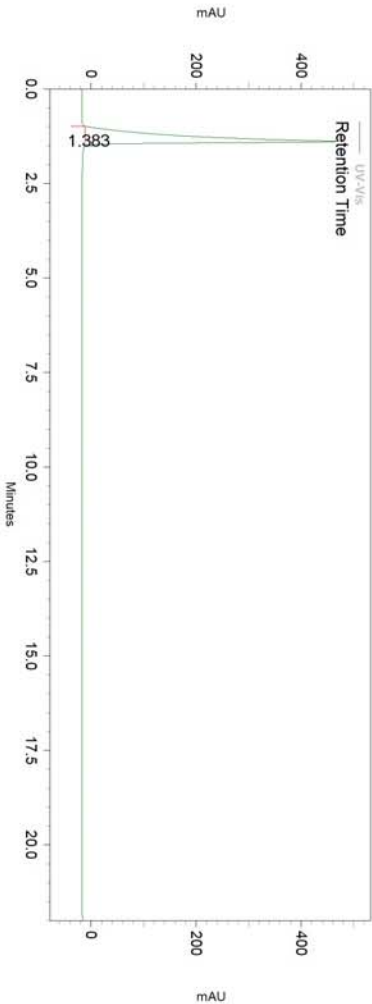

| UV-Vis Results |                |         |              |                   |
|----------------|----------------|---------|--------------|-------------------|
| Name           | Retention Time | Area    | Area Percent | Integration Codes |
|                | 1.383          | 5119966 | 100.000      | MM                |
| Totals         |                | 5119966 | 100.000      |                   |

Instrument Name: HPLC  
Acquisition Method: C:\EZStart\Projects\Default\Method\80MeOH20H2O\1.522min.mnt  
Sequence: C:\HPLC\data\Danabc.seq  
Software Version: Version 3.1.7

## Empirical Formula Confirmation Report

Page 1 of 1

Sample Name: NSC117199 Sample Location: P1-E-02 Sample Id: NSC117199 Operator: EasyAccess  
Data File Name: D:\PE Sciex Data\Projects\chemist\03-08\Data\040308-NEG-00460.wiff Acq Time: March 04 2008, 02:51:38 PM  
Method: D:\TOF\_Data\damethods\EASY ACCESS2.ANM\efc.xml

One or more scans have failed IRM. Review the data file for details.

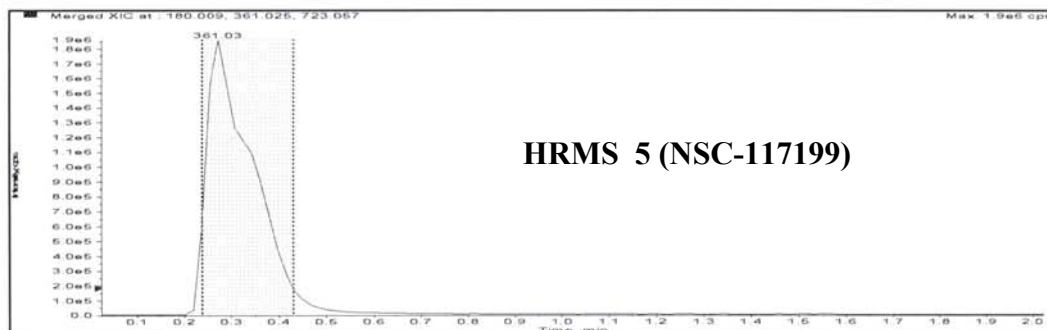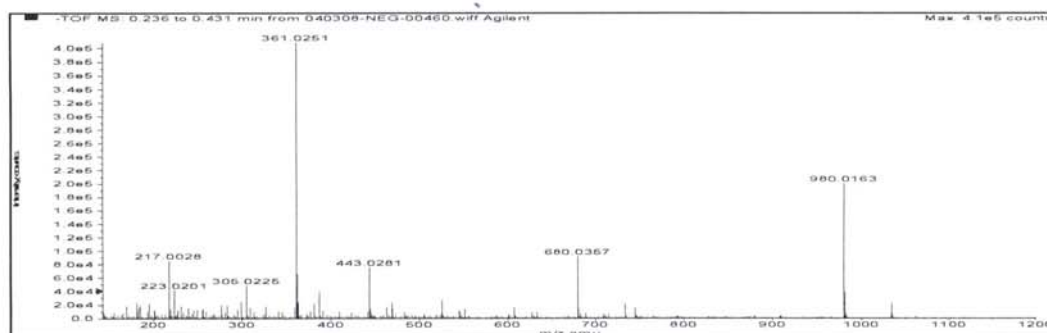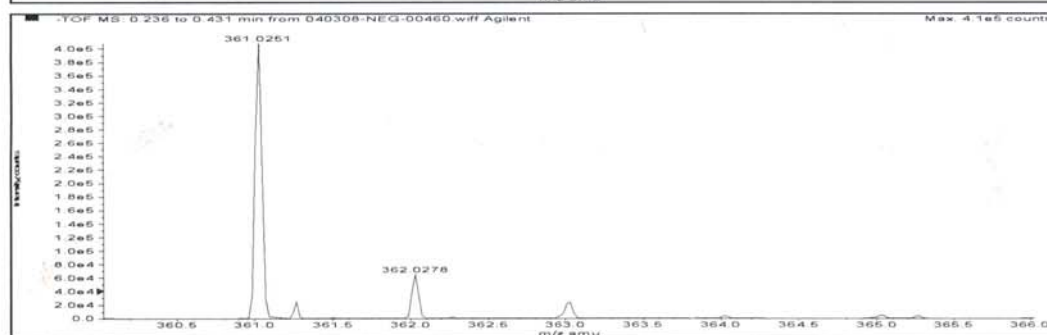

| Formula     | Compound name | Mass      | Peak RT (min) | Peak area  | Description |
|-------------|---------------|-----------|---------------|------------|-------------|
| C14H10N4O6S | --            | 362.03210 | 0.27          | 1.24999 E7 | --          |

| Species | Abundance (counts) | Ion Mass  | Measured Mass | Error (mDa) | Error (ppm) | Ret. Time Error (min) |
|---------|--------------------|-----------|---------------|-------------|-------------|-----------------------|
| [M-H]-  | 409551.10          | 361.02483 | 361.02507     | 0.24452     | 0.68        | --                    |

Tuesday, March 04, 2008

14:53:49 PM



**Compound 14a**

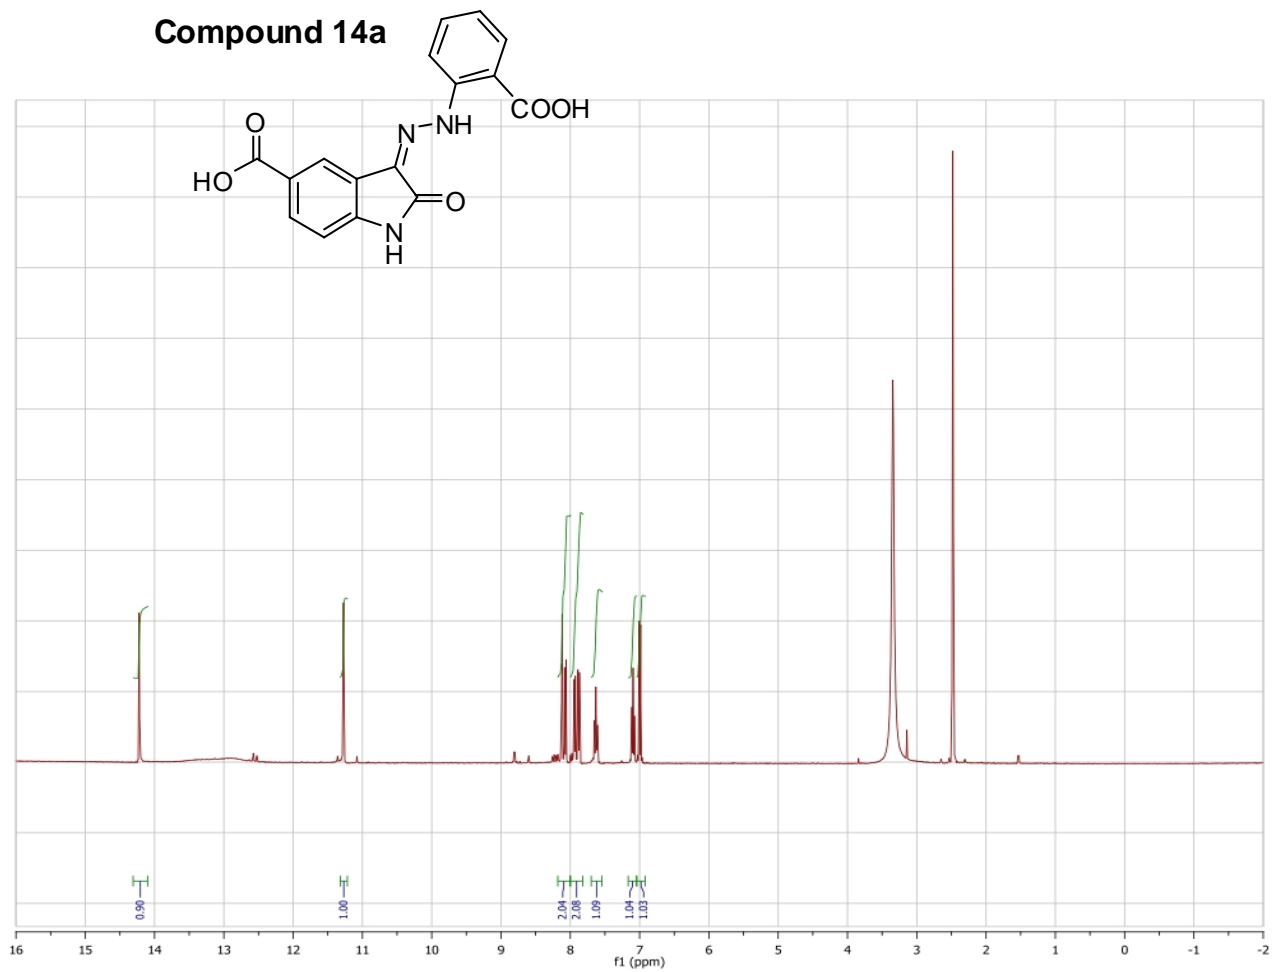

**Expansion of the  $^1\text{H}$  NMR (DMSO- $d_6$ ) spectrum of 14a ( $\delta$  6.9 – 8.2 ppm)**

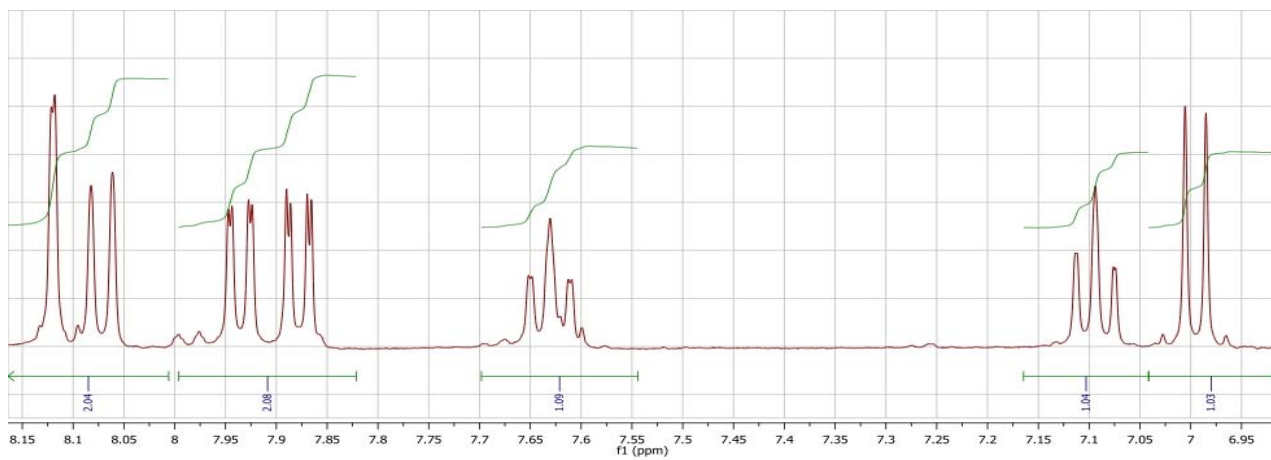

HPLC 14a

Area Percent Report

data\harshan\h12522\System6-22-2007 1-13-51 PM.dat  
Acquired: 6/22/2007 1:17:14 PM

Page 1 of 1 Data File: C:\HPLC  
Printed: 7/3/2007 2:33:17 PM

Analyst: System  
Sample ID: h12522

Vial: N/A

Injection Volume: 0

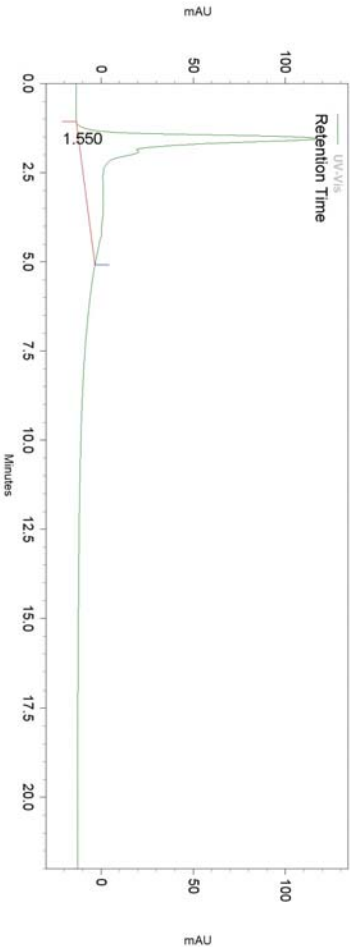

UV-Vis Results

| Name   | Retention Time | Area    | Area Percent | Integration Codes |
|--------|----------------|---------|--------------|-------------------|
|        | 1.550          | 4034859 | 100.000      | MM                |
| Totals |                | 4034859 | 100.000      |                   |

Instrument Name: HPLC  
Acquisition Method: C:\EZStart\Projects\Default\Method\80MeOH20H2O\1.722min.met  
Sequence: C:\HPLC\data\Dan\abc.seq  
Software Version: Version 3.1.7

## HRMS 14a

## Empirical Formula Confirmation Report

Page 1 of 1

Sample Name: HL2-052-2 Sample Location: P1-B-05 Sample Id: HL2-052-2 Operator: EasyAccess  
Data File Name: D:\PE Sciex Data\Projects\chemist\08-07\Data\160807-NEG-01133.wiff Acq Time: August 16 2007 05:10:17 PM  
Method: D:\TOF\_Data\damethods\EASY ACCESS2.ANM\efc.xml

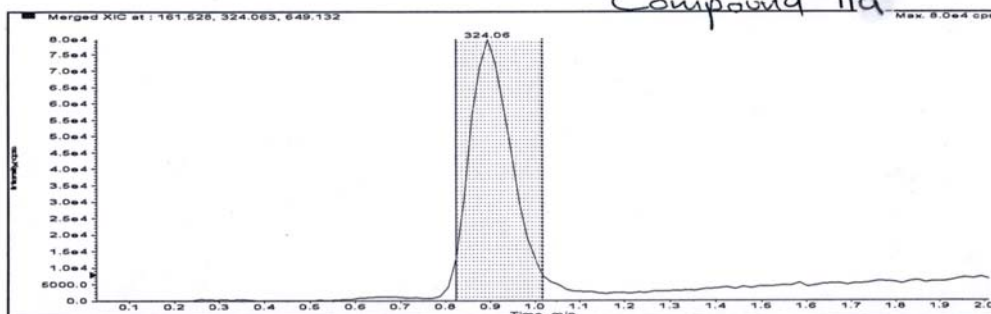

Merged XIC, Period#: 1 Experiment#: 1

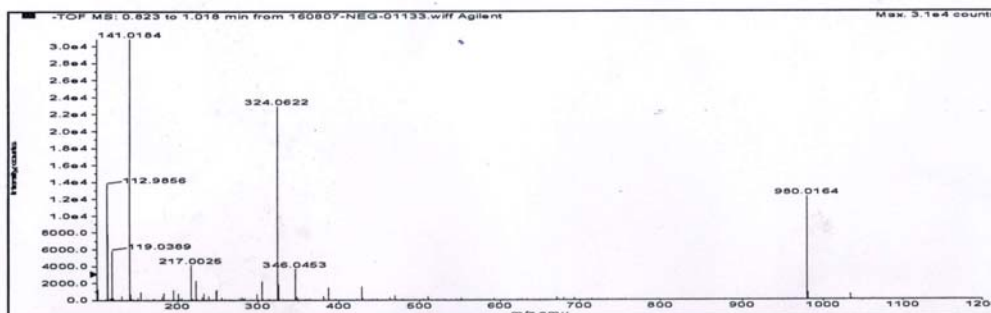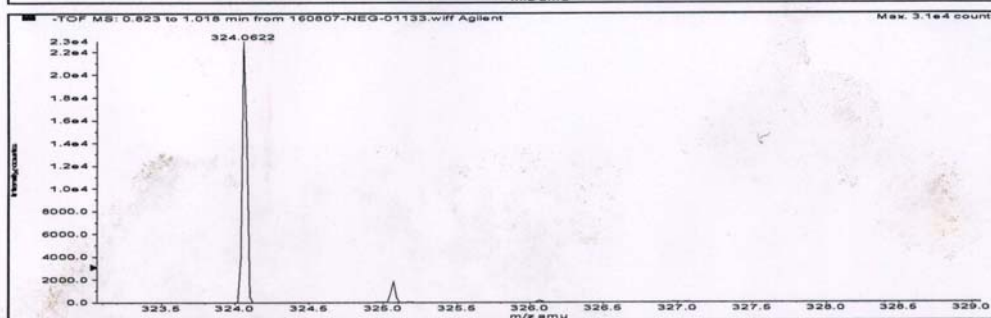

| Formula    | Compound name | Mass      | Peak RT (min) | Peak area  | Description |
|------------|---------------|-----------|---------------|------------|-------------|
| C16H11N3O5 | --            | 325.06987 | 0.89          | 5.19140 E5 | --          |

| Species | Abundance (counts) | Ion Mass  | Measured Mass | Error (mDa) | Error (ppm) | Ret. Time Error (min) |
|---------|--------------------|-----------|---------------|-------------|-------------|-----------------------|
| [M-H]-  | 23392.48           | 324.06259 | 324.06224     | -0.35504    | -1.10       | --                    |

Thursday, August 16, 2007

17:12:26 PM

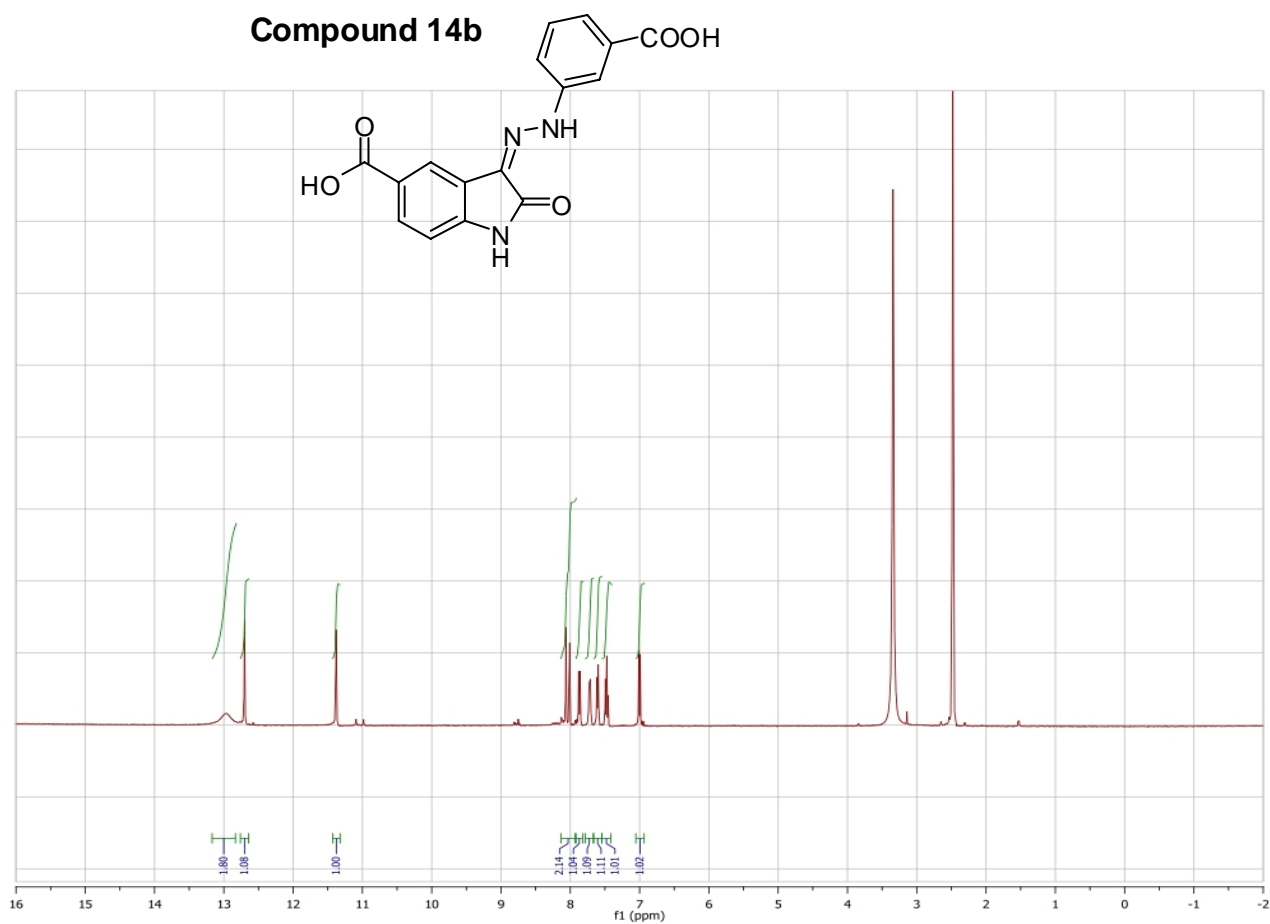

**Expansion of the  $^1\text{H}$  NMR (DMSO- $d_6$ ) spectrum of 14b ( $\delta$  6.9 – 8.2 ppm)**

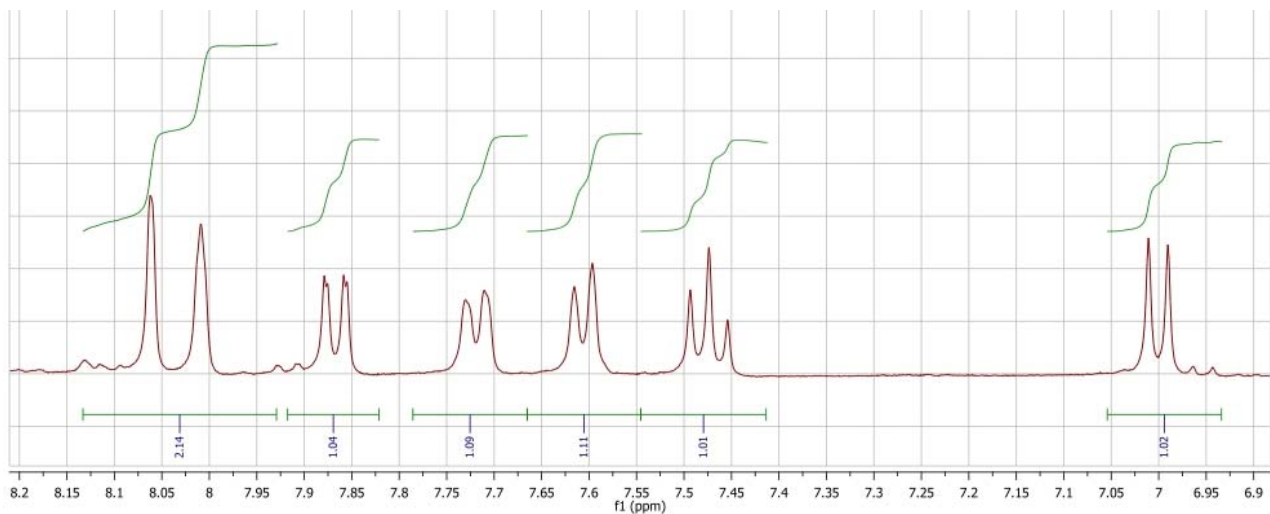



## Area Percent Report

data\harshani\hl2522\System6-27-2007 12-34-35 PM.dat  
Acquired: 6/27/2007 12:37:09 PM

Page 1 of 2 Data File: C:\HPL  
Printed: 7/3/2007 2:55:23 PM

Analyst: System  
Sample ID: hl2522

Vial: N/A

Injection Volume: 0

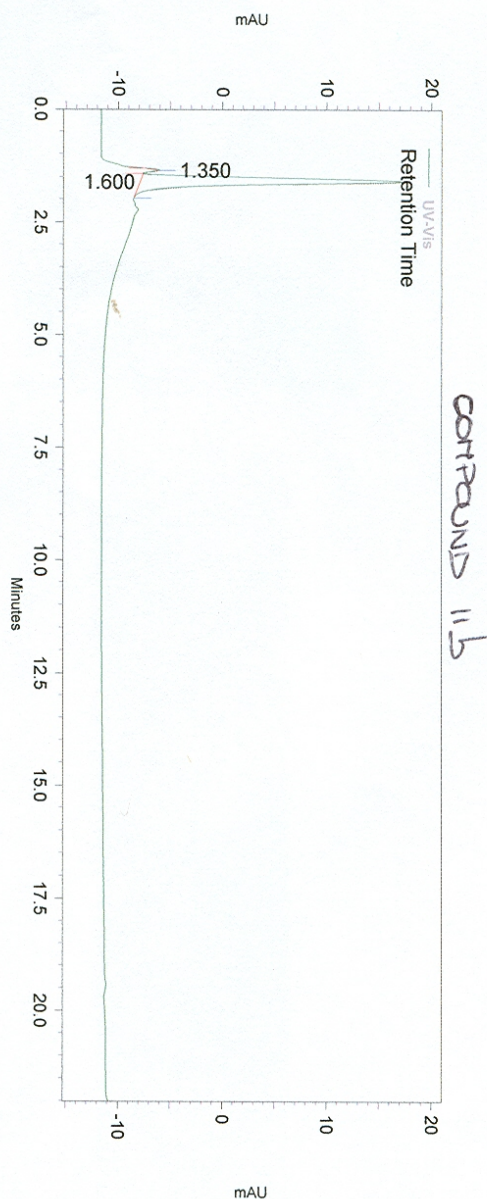

## HPLC 14b

## UV-Vis Results

| Name | Retention Time | Area   | Area Percent | Integration Codes |
|------|----------------|--------|--------------|-------------------|
|      | 1.350          | 1062   | 0.428        | MM                |
|      | 1.600          | 247261 | 99.572       | MM                |

|        |  |        |         |  |
|--------|--|--------|---------|--|
| Totals |  | 248323 | 100.000 |  |
|--------|--|--------|---------|--|

Instrument Name: HPLC  
Acquisition Method: C:\EZStart\Projects\Default\Method\80MeOH20H2O\1.722min.met  
Sequence: C:\HPLC data\Danabc.seq  
Software Version: Version 3.1.7

## HRMS of 14b

## Empirical Formula Confirmation Report

Page 1 of 1

Sample Name: HL2-052-3 Sample Location: P1-B-06 Sample Id: HL2-052-3 Operator: EasyAccess  
 Data File Name: D:\PE Sciex Data\Projects\chemist08-07\Data\160807-NEG-01134.wiff Acq Time: August 16 2007. 05:13:15 PM  
 Method: D:\TOF\_Data\damethods\EASY ACCESS2.ANM\efc.xml

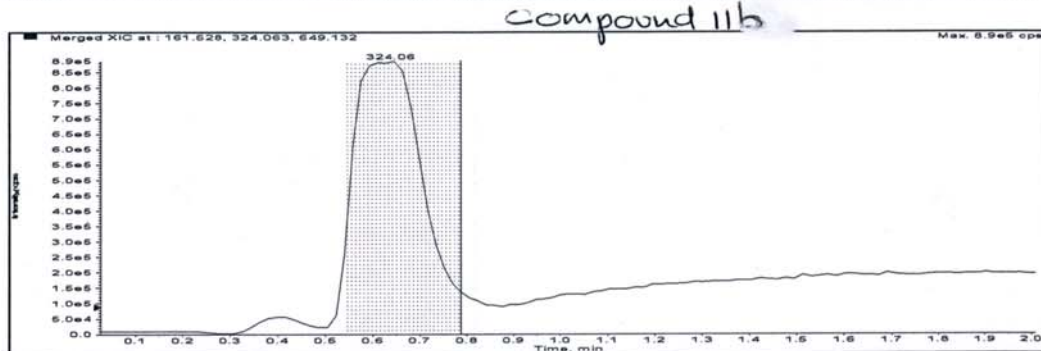

Merged XIC, Period#: 1 Experiment#: 1

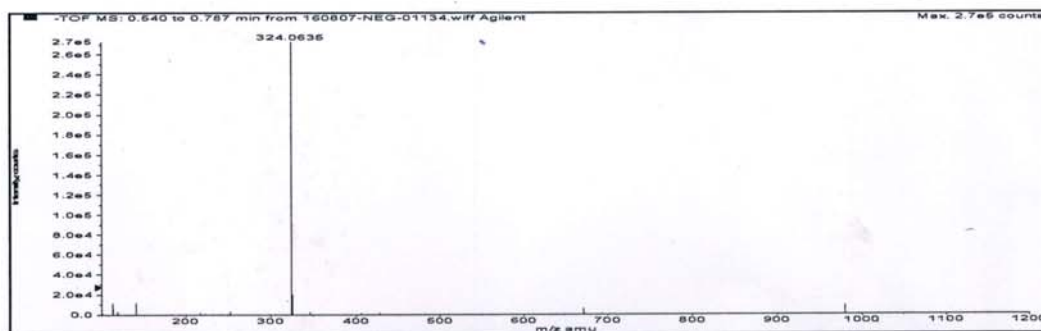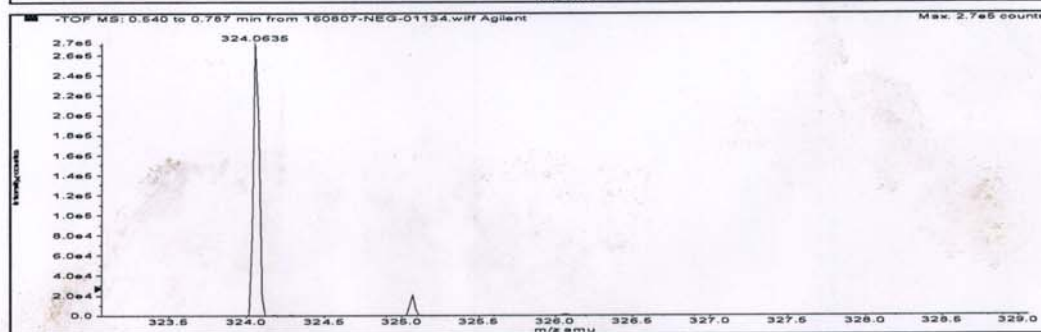

| Formula    | Compound name | Mass      | Peak RT (min) | Peak area  | Description |
|------------|---------------|-----------|---------------|------------|-------------|
| C16H11N3O5 | --            | 325.06987 | 0.64          | 8.42726 E6 | --          |

| Species | Abundance (counts) | Ion Mass  | Measured Mass | Error (mDa) | Error (ppm) | Ret. Time Error (min) |
|---------|--------------------|-----------|---------------|-------------|-------------|-----------------------|
| [M-H]-  | 278788.41          | 324.06259 | 324.06352     | 0.92378     | 2.85        | --                    |

Thursday, August 16, 2007

17:15:26 PM

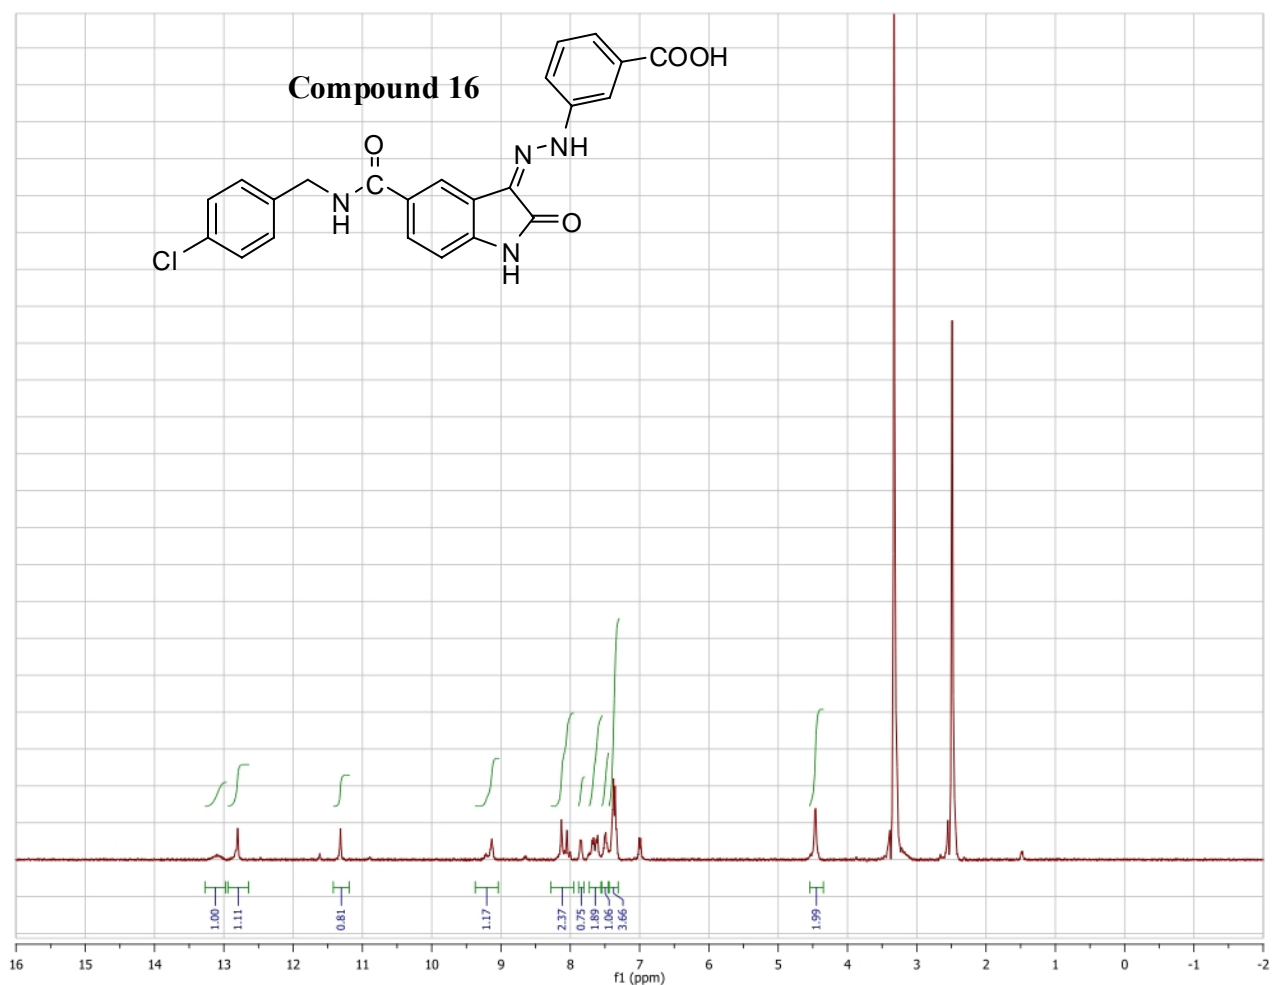

**Expansion of the <sup>1</sup>H NMR (DMSO-*d*<sub>6</sub>) spectrum of 16 (δ 6.9 – 14.0 ppm)**

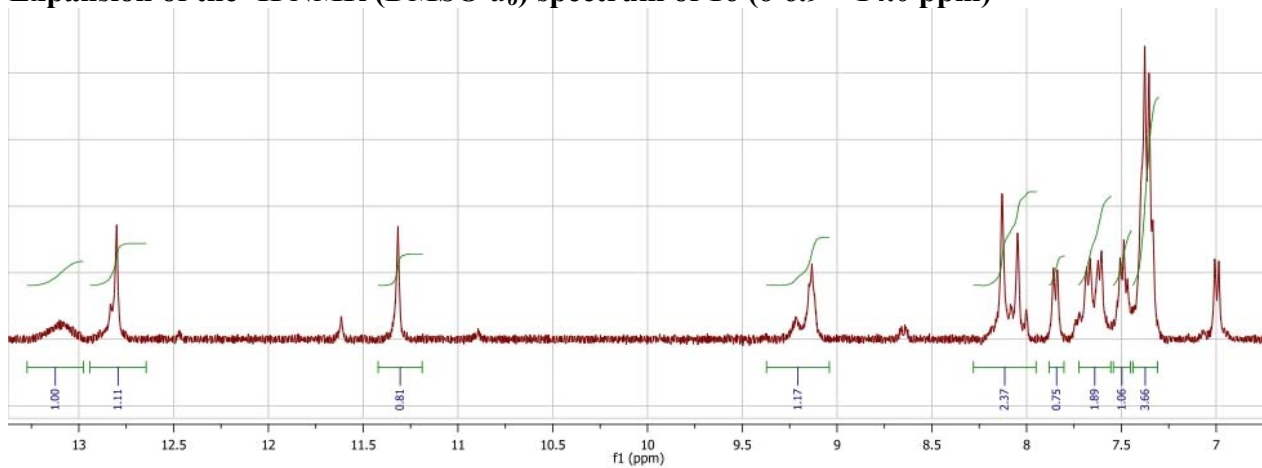

HPLC 16

Area Percent Report

data\harsani\hl252System7-3-2007 1-15-47 PM.dat  
Acquired: 7/3/2007 1:16:45 PM

Page 1 of 2 Data File: C:\HPLC  
Printed: 7/3/2007 6:09:36 PM

Analyst: System  
Sample ID: hl2522

Vial: N/A

Injection Volume: 0

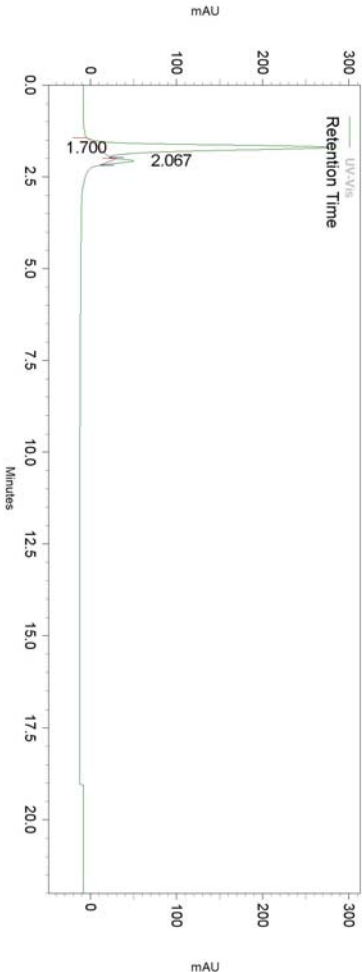

UV-Vis Results

| Name   | Retention Time | Area    | Area Percent | Integration Codes |
|--------|----------------|---------|--------------|-------------------|
|        | 1.700          | 2745947 | 94.288       | MM                |
|        | 2.067          | 166341  | 5.712        | MM                |
| Totals |                | 2912288 | 100.000      |                   |

Instrument Name: HPLC      Software Version: Version 3.1.7  
Acquisition Method: C:\EZStart\Projects\Default\Method\80MeOH20H2O\1.522min.met  
Sequence: C:\HPLC\data\Dan\abc.seq



## HRMS 16

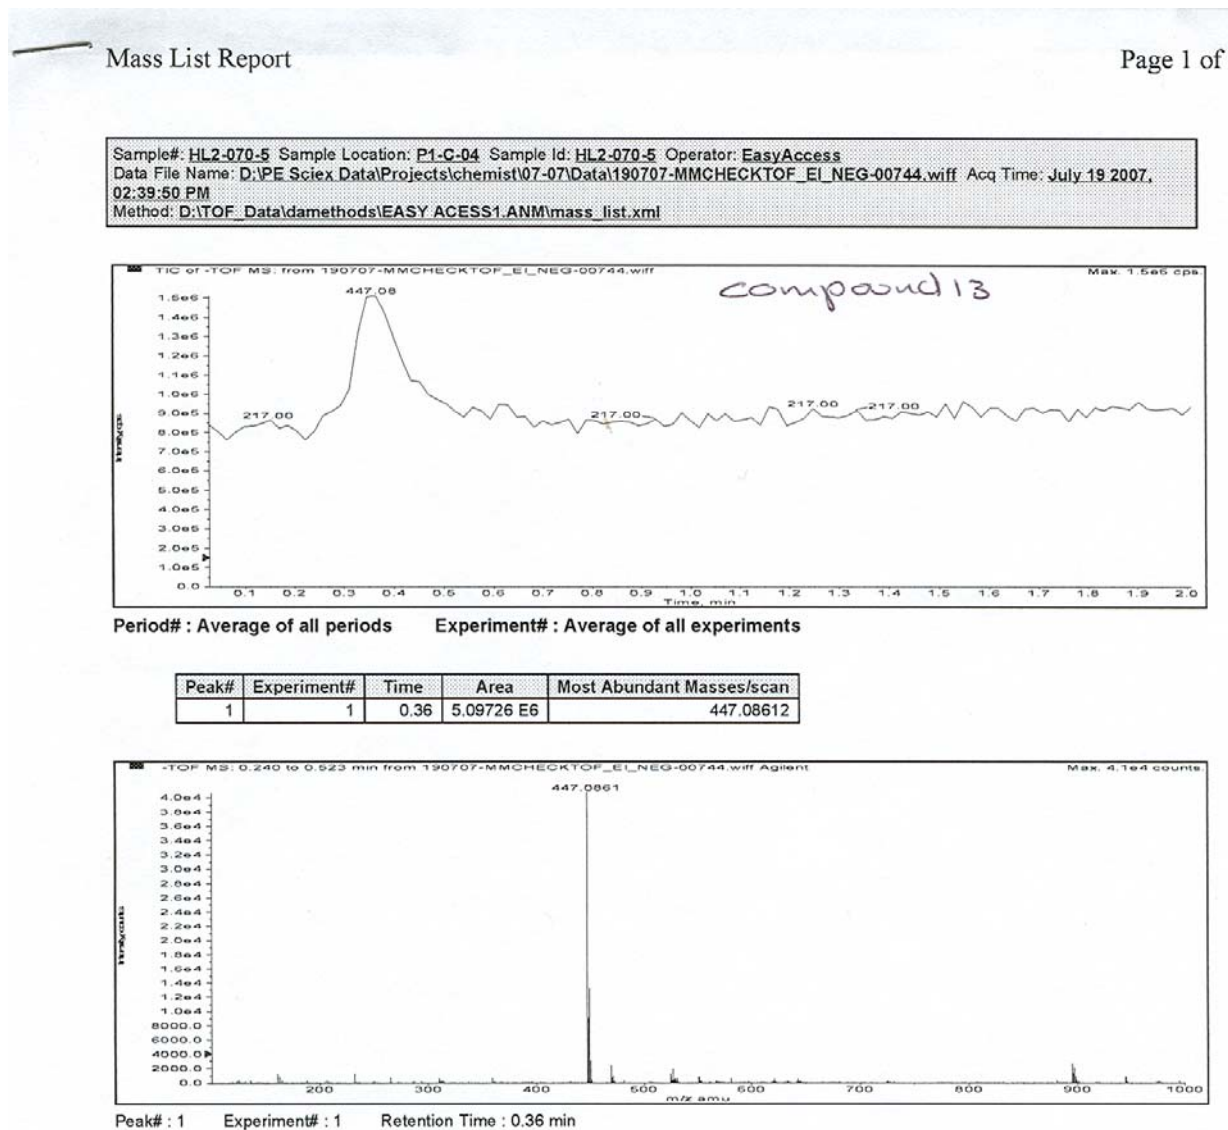

**Compound 10a**

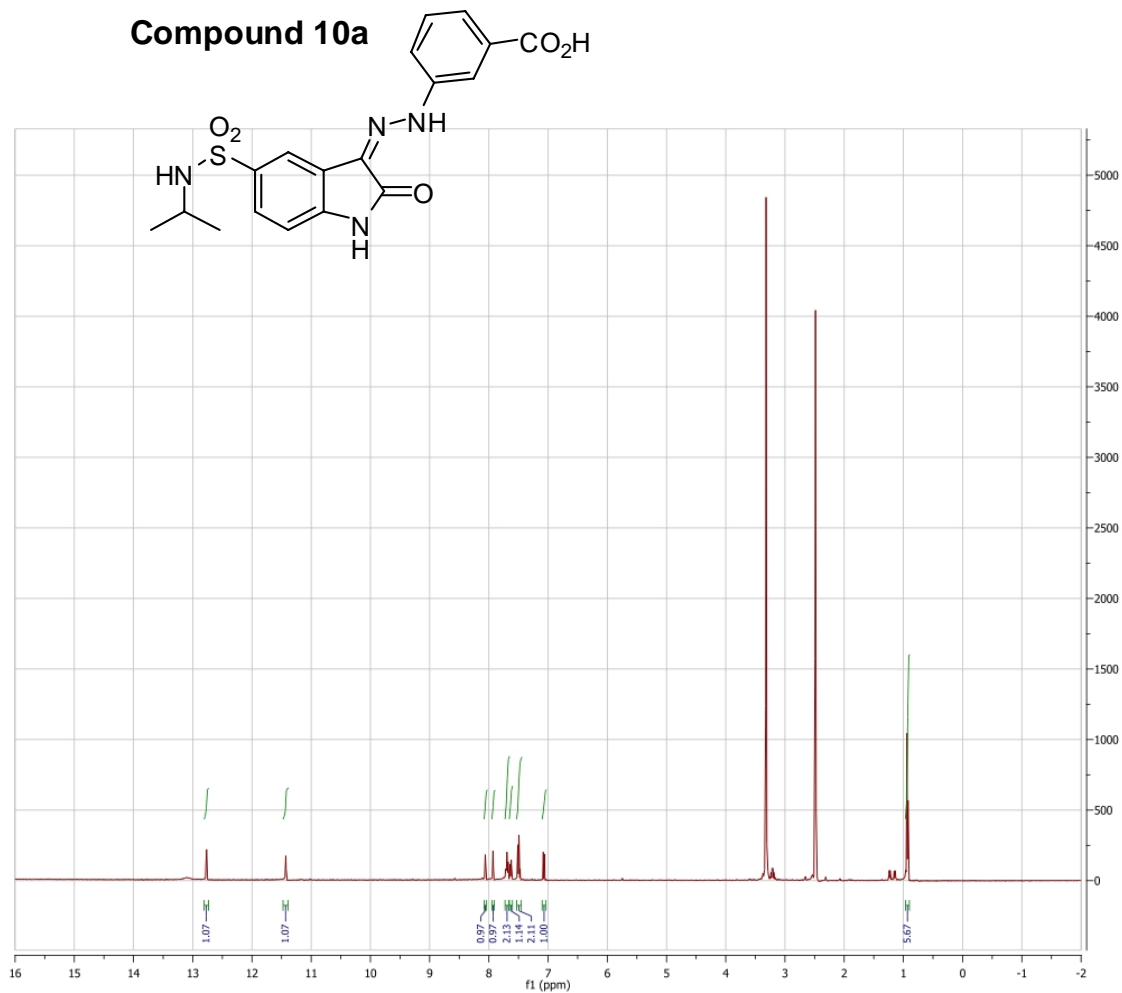

**Expansion of the <sup>1</sup>H NMR (DMSO-*d*<sub>6</sub>) spectrum of 10a (δ 7.0 – 8.2 ppm)**

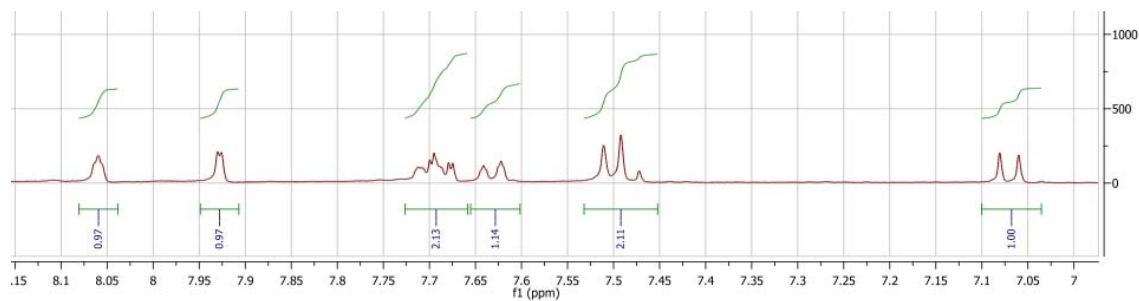

HPLC 10a

Area Percent Report

data\Robert\rpm297 method II\System4-10-2007 4-48-04 PM.dat  
Acquired: 4/10/2007 4:48:28 PM

Page 1 of 2 Data File: C:\HPLC  
Printed: 4/10/2007 5:12:23 PM

Analyst: System  
Sample ID: rpm297 method II Vial: N/A Injection Volume: 0

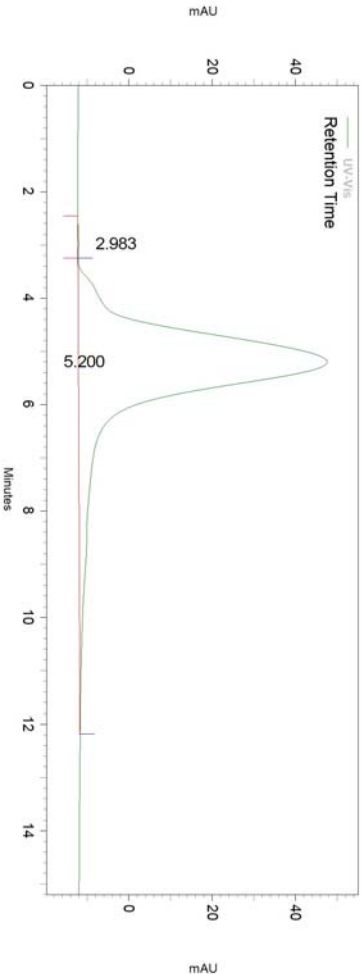

UV-Vis Results

| Name | Retention Time | Area   | Area Percent | Integration Codes |
|------|----------------|--------|--------------|-------------------|
|      | 2.983          | 4027   | 0.084        | BV                |
|      | 5.200          | 478252 | 99.916       | VB                |

|        |  |         |         |  |
|--------|--|---------|---------|--|
| Totals |  | 4792279 | 100.000 |  |
|--------|--|---------|---------|--|

Instrument Name: HPLC Software Version: Version 3.1.7  
Acquisition Method: C:\EZStart\Projects\Default\Method\meoh-h2075-25 0.4 fl.met  
Sequence: C:\HPLC data\Dan\abc.seq

## HRMS 10a

Empirical Formula Confirmation Report

Page 1 of 1

Compound 7a

Sample Name: RPM297-7a Sample Location: P1-E-08 Sample Id: RPM297-7a Operator: EasyAccess  
Data File Name: D:\PE\_Sciex\_Data\Projects\chemist\03-08\Data\040308-NEG-00466.wiff Acq Time: March 04 2008, 03:10:33 PM  
Method: D:\TOF\_Data\damethods\EASY ACCESS2.ANM\efc.xml

One or more scans have failed IRM. Review the data file for details.

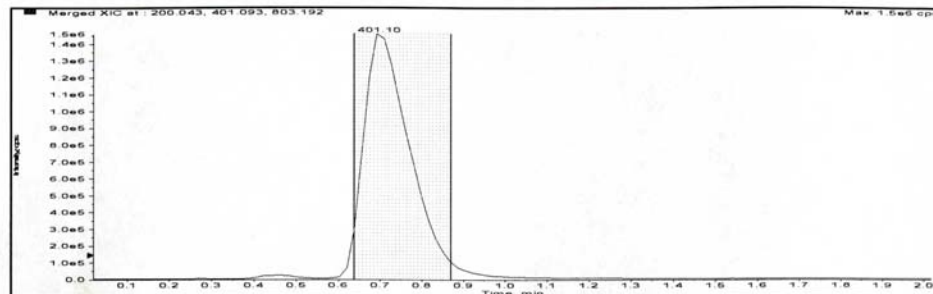

Merged XIC, Period# : 1 Experiment# : 1

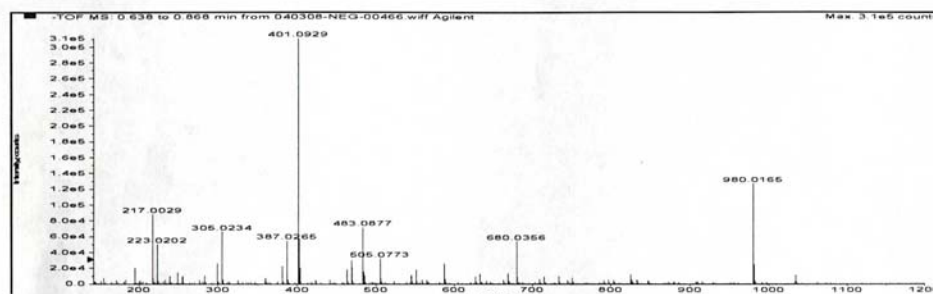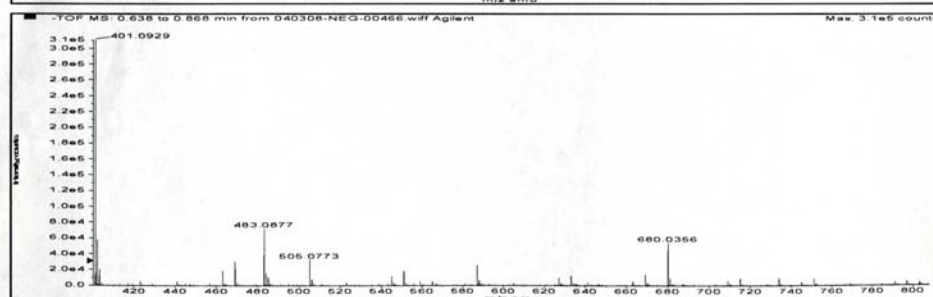

| Formula     | Compound name | Mass      | Peak RT (min) | Peak area  | Description |
|-------------|---------------|-----------|---------------|------------|-------------|
| C18H18N4O5S | --            | 402.09979 | 0.70          | 1.12477 E7 | --          |

| Species | Abundance (counts) | Ion Mass  | Measured Mass | Error (mDa) | Error (ppm) | Ret. Time Error (min) |
|---------|--------------------|-----------|---------------|-------------|-------------|-----------------------|
| [M-H]-  | 311592.36          | 401.09251 | 401.09290     | 0.38940     | 0.97        | --                    |
| [2M-H]- | 5212.62            | 803.19230 | 803.19233     | 0.02433     | 0.03        | --                    |

Tuesday, March 04, 2008

15:12:46 PM

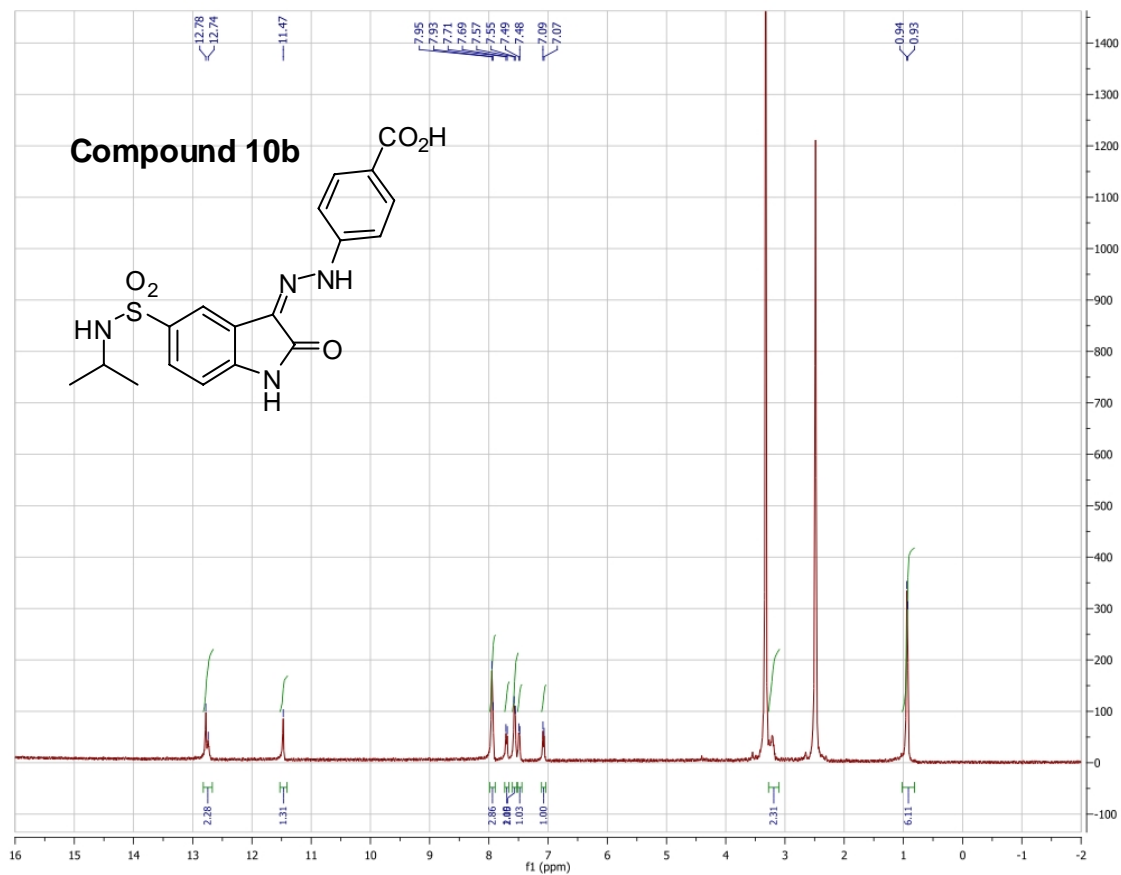

Expansion of the  $^1\text{H}$  NMR (DMSO- $d_6$ ) spectrum of 10b ( $\delta$  7.0 – 8.1 ppm)

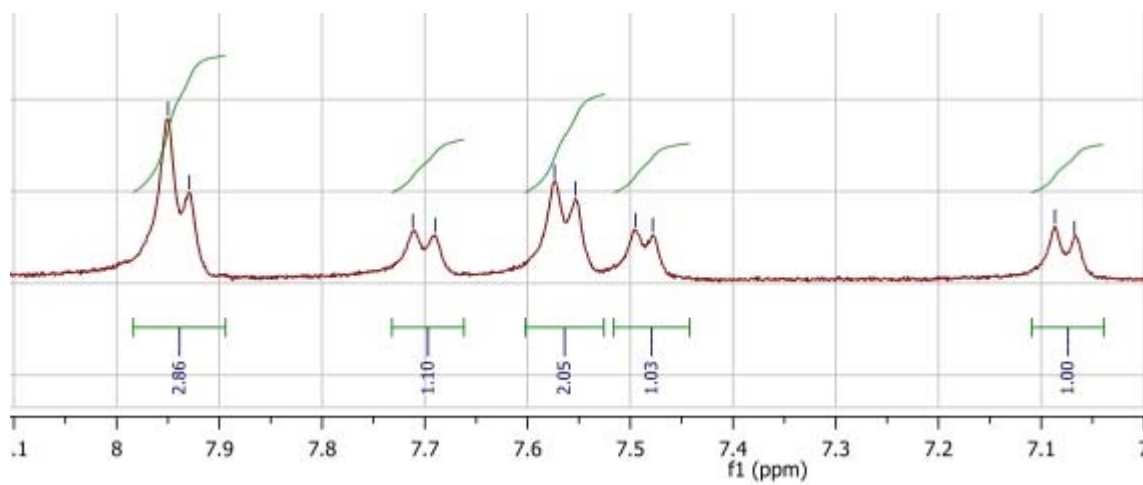

HPLC 10b

Area Percent Report

data:Robertar\RPMT739a\System11-28-2007 10-04-24 AM\data

Printed: 11/28/2007 11:06:55 AM

Page 1 of 2 Data File: C:\HPLC

Analyst: System  
Sample ID: RPTM739a

Vial: N/A

Injection Volume: 0

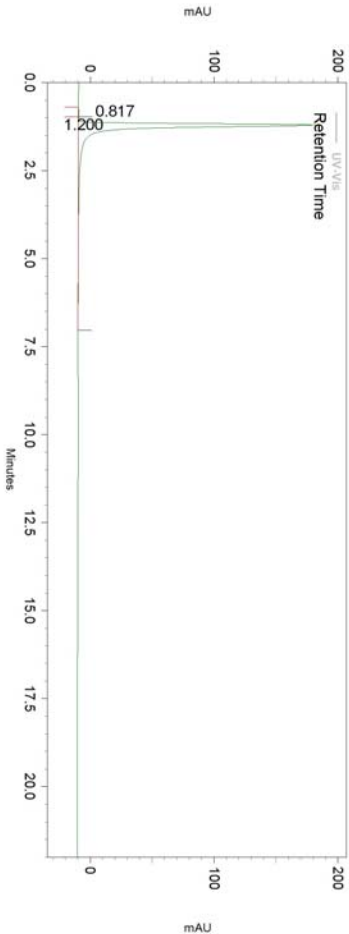

UV-Vis Results

| Name | Retention Time | Area    | Area Percent | Integration Codes |
|------|----------------|---------|--------------|-------------------|
|      | 0.817          | 2139    | 0.125        | BV                |
|      | 1.200          | 1704888 | 99.875       | VB                |

|        |  |         |         |  |
|--------|--|---------|---------|--|
| Totals |  | 1707027 | 100.000 |  |
|--------|--|---------|---------|--|

Instrument Name: HPLC  
Acquisition Method: C:\EZStart\Projects\Default\Method\MeOH90CH3CN10f1.5-21min.mct  
Sequence: C:\HPLC\data\Dan\abc.seq  
Software Version: Version 3.1.7

## HRMS 10b

## Empirical Formula Confirmation Report

CatRound 7b

Page 1 of 1

Sample Name: RPM739-7b Sample Location: P1-E-09 Sample Id: RPM739-7b Operator: EasyAccess  
 Data File Name: D:\PE\_Sciex\_Data\Projects\chemist03-08\Data\040308-NEG-00467.wiff Acq Time: March 04 2008, 03:13:33 PM  
 Method: D:\TOF\_Data\damethods\EASY ACCESS2.ANM\efc.xml

One or more scans have failed IRM. Review the data file for details.

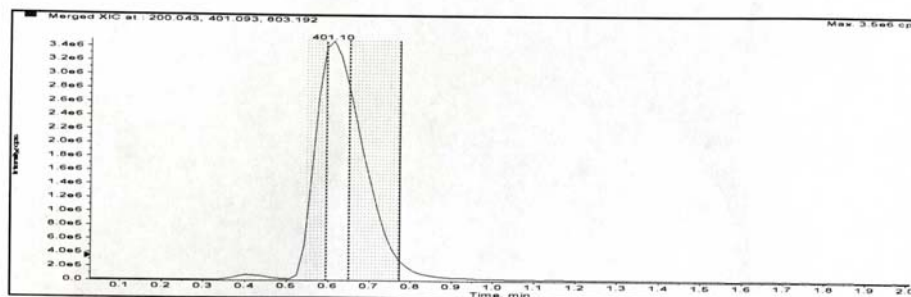

Merged XIC, Period# : 1 Experiment# : 1

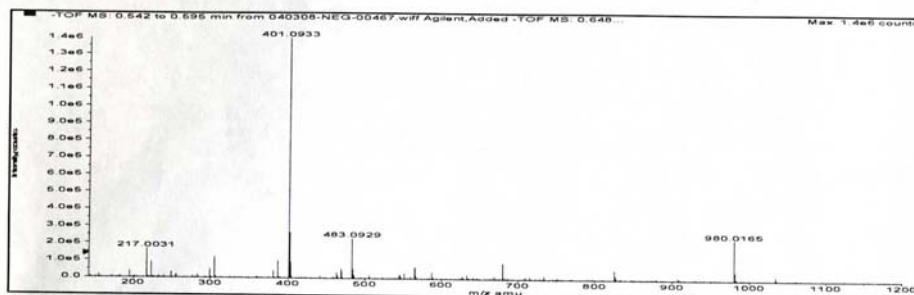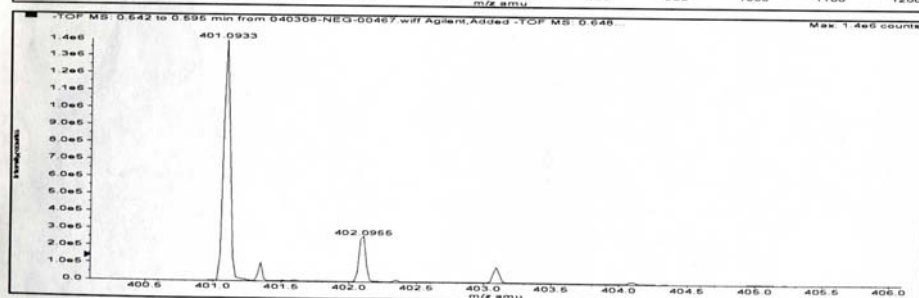

| Formula     | Compound name | Mass      | Peak RT (min) | Peak area  | Description |
|-------------|---------------|-----------|---------------|------------|-------------|
| C18H18N4O5S | --            | 402.09979 | 0.61          | 2.76704 E7 | --          |

| Species            | Abundance (counts) | Ion Mass  | Measured Mass | Error (mDa) | Error (ppm) | Ret. Time Error (min) |
|--------------------|--------------------|-----------|---------------|-------------|-------------|-----------------------|
| [M-H] <sup>-</sup> | 1396496.48         | 401.09251 | 401.09328     | 0.76761     | 1.91        | --                    |

Tuesday, March 04, 2008

15:15:46 PM

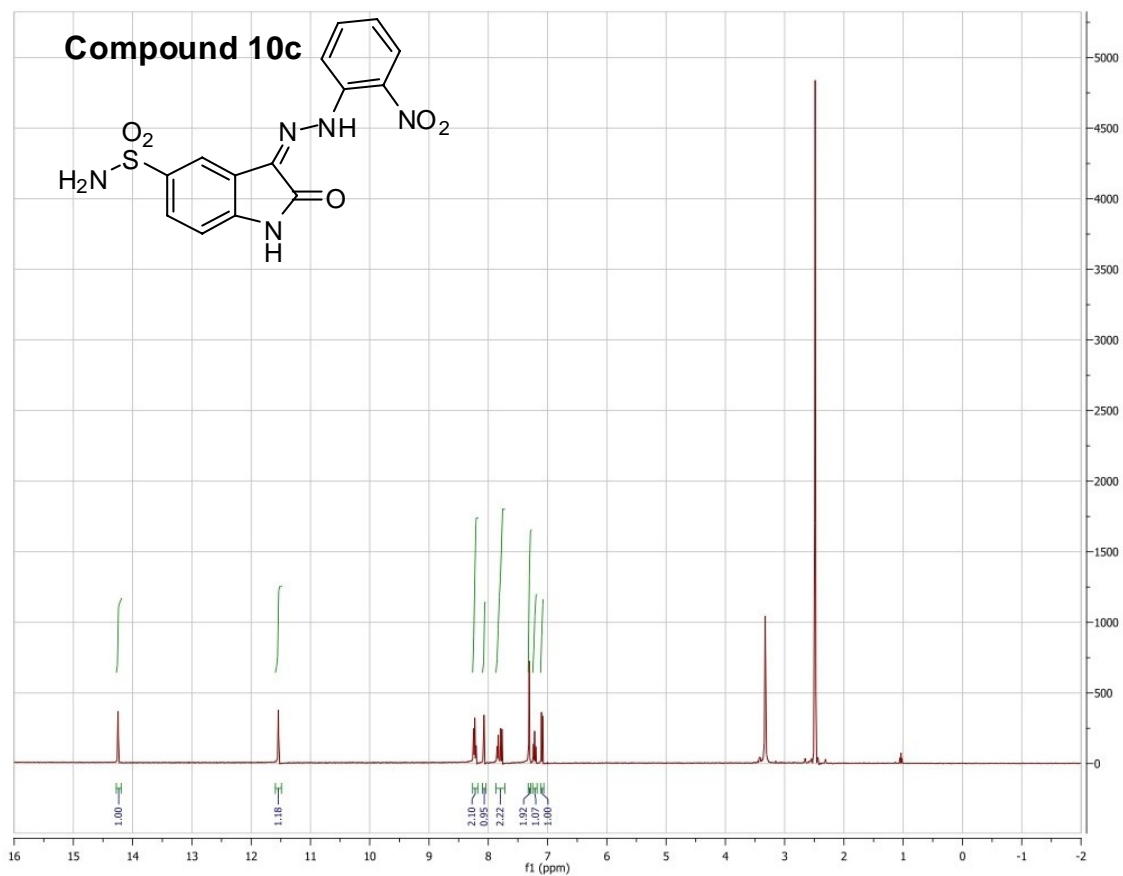

$^1\text{H}$  NMR (DMSO- $d_6$ ) spectrum of 10c (expansion ( $\delta$  7-8.3 ppm)).

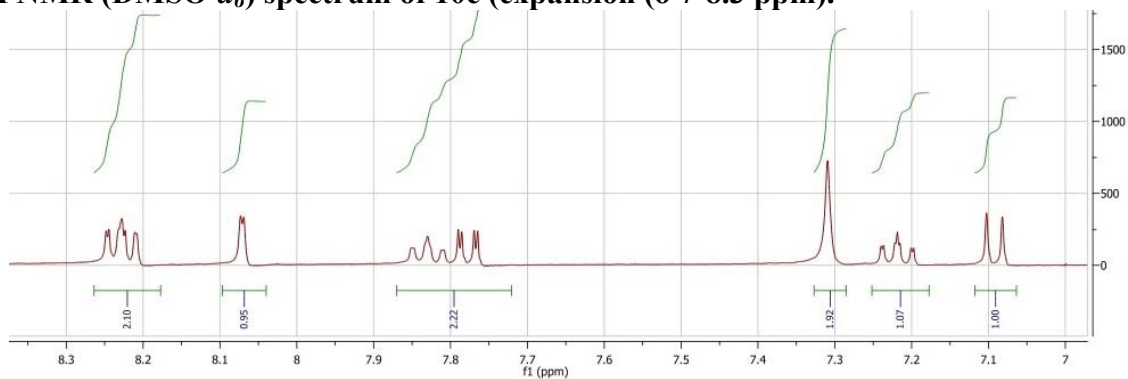



HPLC 10c

Area Percent Report

data\Robert\pm134 ch3cn 90 h2o 10\System4-4-2007 6-20-30 PM.dat  
Acquired: 4/4/2007 6:20:55 PM

Page 1 of 2 Data File: C:\HPLC  
Printed: 4/4/2007 6:31:26 PM

Analyst: System  
Sample ID: rpm134 ch3cn 90 h2o 10 Vial: N/A Injection Volume: 0

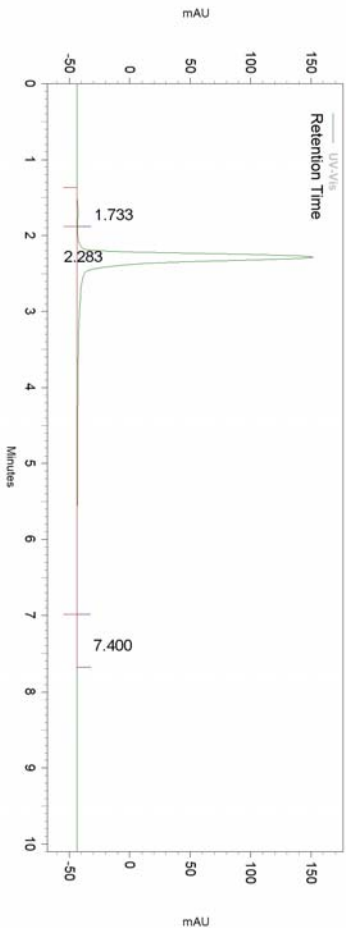

UV-Vis Results

| Name   | Retention Time | Area    | Area Percent | Integration Codes |
|--------|----------------|---------|--------------|-------------------|
|        | 1.733          | 10940   | 0.654        | BV                |
|        | 2.283          | 1659724 | 99.285       | VV                |
|        | 7.400          | 1014    | 0.061        | VB                |
| Totals |                |         |              |                   |

Instrument Name: HPLC  
Acquisition Method: C:\EZStart\Projects\Default\Method\90CH3CN10H2O.fl 0.75 10min.mnt  
Sequence: C:\HPLC\data\Danabc.seq  
Software Version: Version 3.1.7

## HRMS 10c

## Empirical Formula Confirmation Report

Page 1 of 1

Compound 7c

Sample Name: RPM134-7c Sample Location: P1-E-07 Sample Id: RPM134-7d Operator: EasyAccess  
Data File Name: D:\PE Sciex Data\Projects\chemist\03-08\Data\040308-NEG-00465.wiff Acq Time: March 04 2008, 03:07:32 PM  
Method: D:\TOF\_Data\methods\EASY ACCESS2.ANM\efc.xml

One or more scans have failed IRM. Review the data file for details.

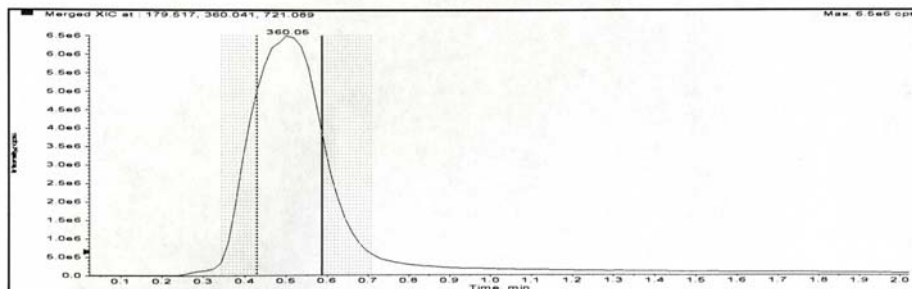

Merged XIC, Period#: 1 Experiment#: 1

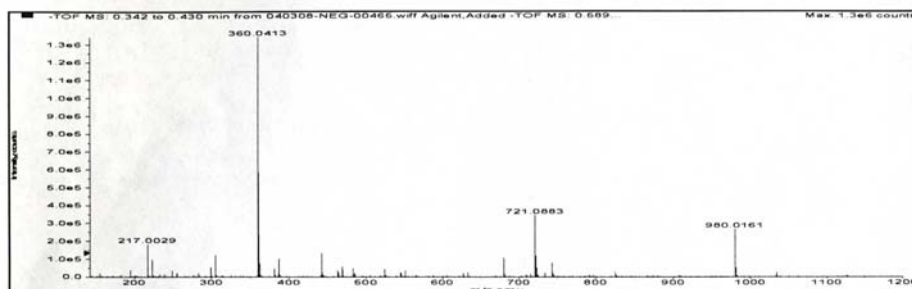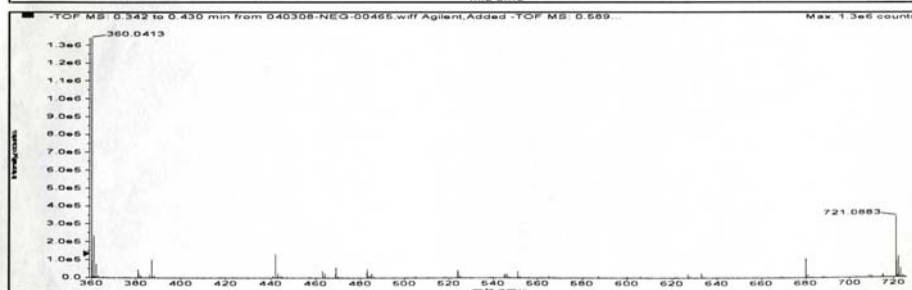

| Formula     | Compound name | Mass      | Peak RT (min) | Peak area  | Description |
|-------------|---------------|-----------|---------------|------------|-------------|
| C14H11N5O5S | --            | 361.04809 | 0.51          | 8.15407 E7 | --          |

| Species | Abundance (counts) | Ion Mass  | Measured Mass | Error (mDa) | Error (ppm) | Ret. Time Error (min) |
|---------|--------------------|-----------|---------------|-------------|-------------|-----------------------|
| [M-H]-  | 1376928.96         | 360.04081 | 360.04127     | 0.45996     | 1.28        | --                    |
| [2M-H]- | 350278.59          | 721.08890 | 721.08833     | -0.57493    | -0.80       | --                    |

Tuesday, March 04, 2008

15:09:45 PM

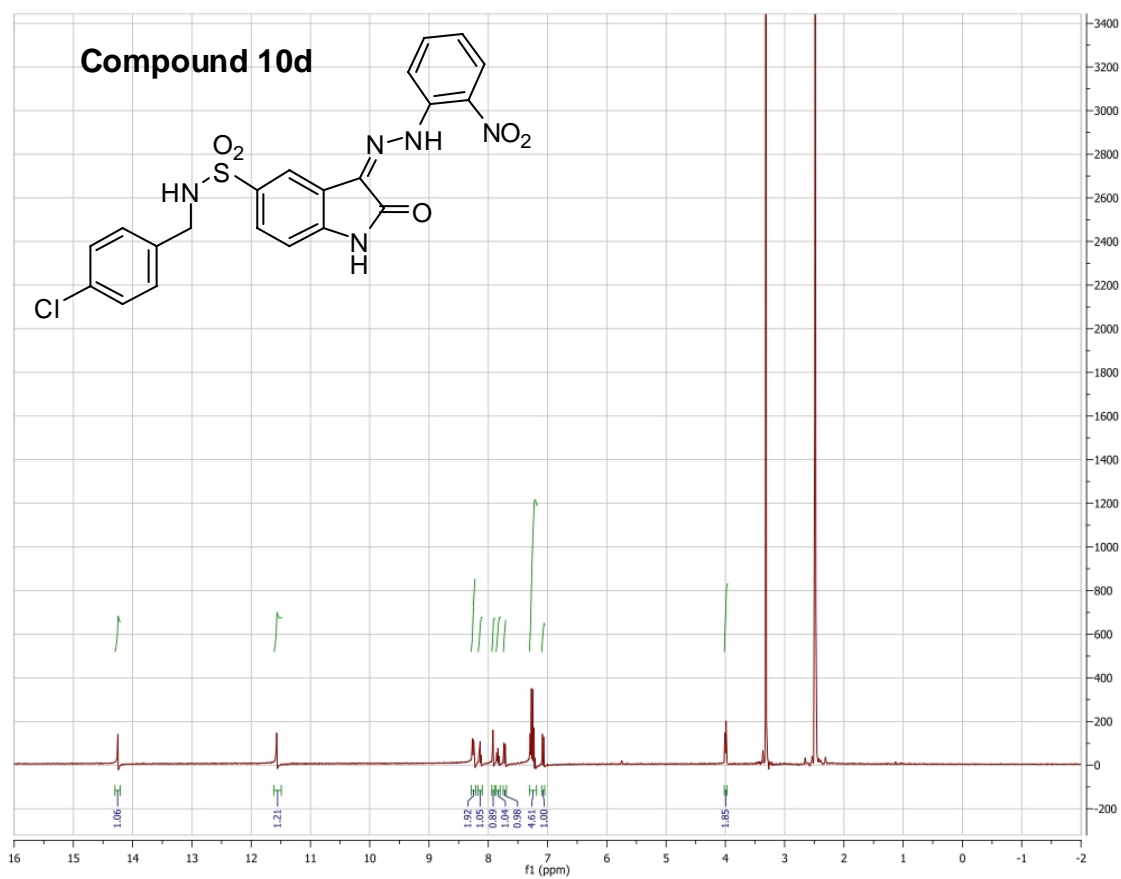

<sup>1</sup>H NMR (DMSO-*d*<sub>6</sub>) spectrum of 10d (expansion (δ 7-8.3 ppm)).

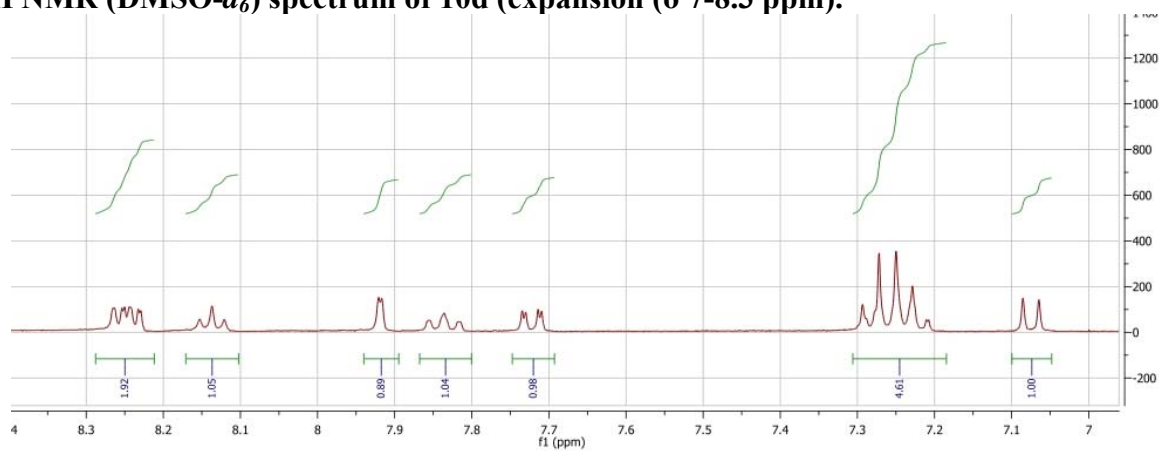

HPLC 10d

Area Percent Report

data\Roberta\RPMM39 ISystem4-4-2007 7-03-53 PM.dat  
Acquired: 4/4/2007 7:04:18 PM  
Page 1 of 2 Data File: C:\HPLC

Printed: 4/4/2007 7:14:51 PM

Analyt: System  
Sample ID: RPMM39 I  
Vial: N/A  
Injection Volume: 0

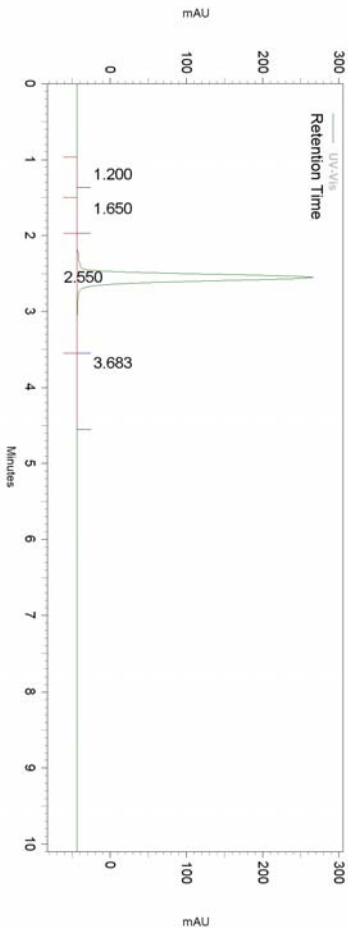

| UV-Vis Results |                |      |              |
|----------------|----------------|------|--------------|
| Name           | Retention Time | Area | Area Percent |

| Integration Codes |       |         |        |
|-------------------|-------|---------|--------|
|                   |       |         |        |
|                   | 1.200 | 307     | 0.015  |
|                   | 1.650 | 1335    | 0.065  |
|                   | 2.550 | 2038563 | 99.751 |
|                   | 3.683 | 3441    | 0.168  |

Instrument Name: HPLC  
Acquisition Method: C:\EZStart\Projects\Default\Method\90CH3CN10H2O fl 0.75 10min.mnt  
Sequence: C:\HPLC\data\Danabc.seq  
Software Version: Version 3.1.7

## HRMS 10d

Mass List Report

COMPOUND 7c

Page 1 of 1

Sample#: rpm139 Sample Location: P1-F-01 Sample Id: rpm139 Operator: EasyAccess  
Data File Name: D:\PE\_Sciex\_Data\Projects\chemist\04-07\Data\020407-ROBERTA2NOREF-00068.wiff Acq Time: April 02 2007, 03:39:33 PM  
Method: D:\TOF\_Data\methods\EASY ACCESS.ANM\mass\_list.xml

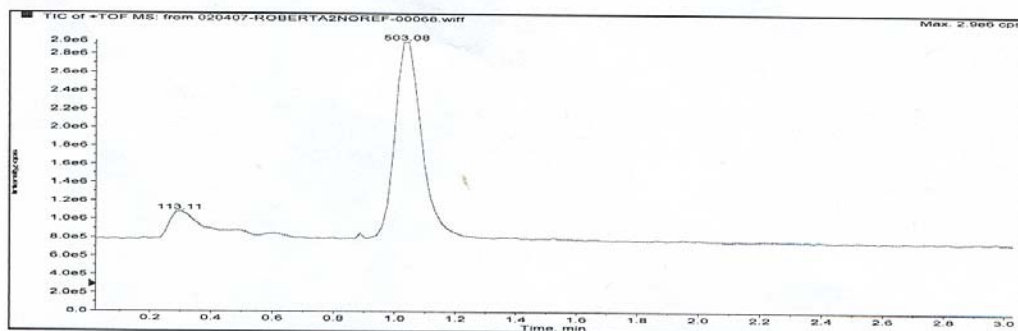

| Peak# | Experiment# | Time | Area       | Most Abundant Masses/scan |
|-------|-------------|------|------------|---------------------------|
| 1     | 1           | 1.04 | 1.29958 E7 | 503.09092                 |

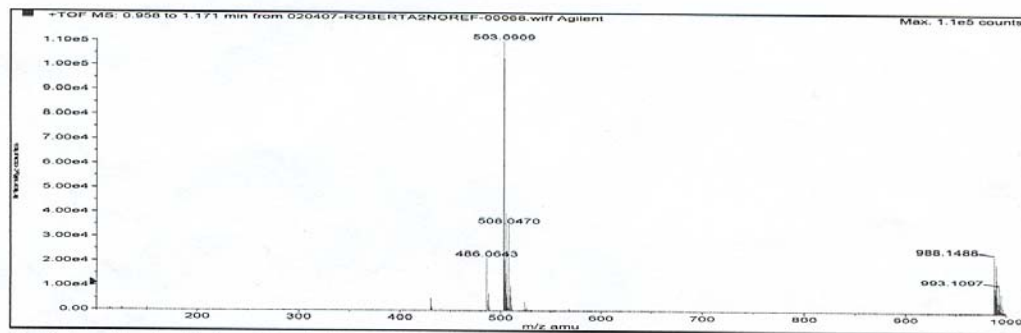

Peak#: 1 Experiment#: 1 Retention Time: 1.04 min

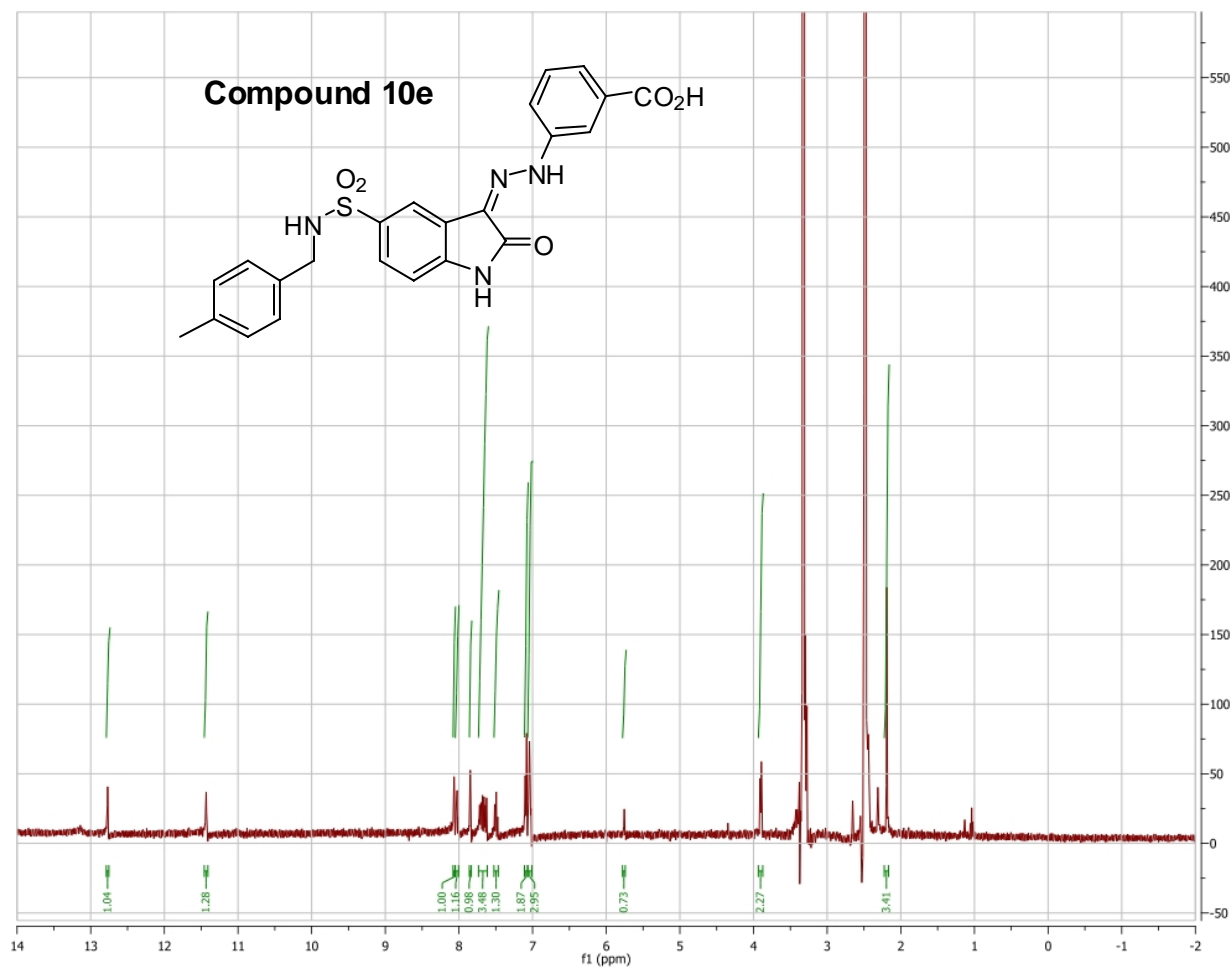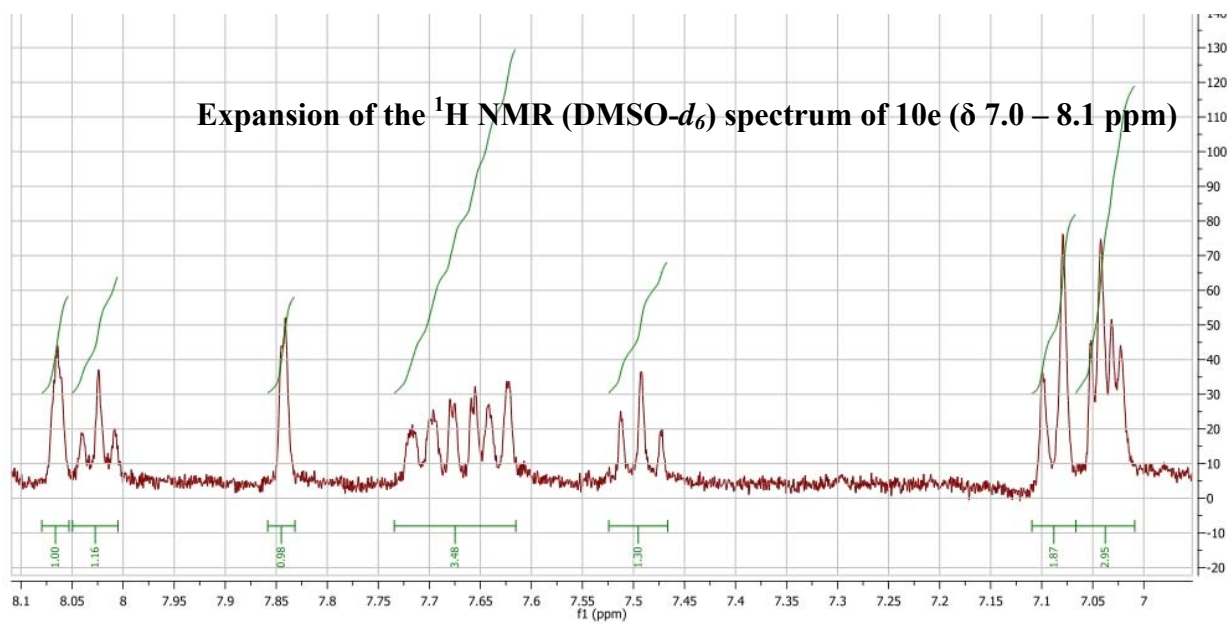

HPLC 10e

Area Percent Report

data\Yunting\YL1-165\System10-16-2007 5-18-38 PM.dat  
Acquired: 10/16/2007 5:19:13 PM

Page 1 of 2 Data File: C:\HPLC  
Printed: 10/16/2007 5:56:23 PM

Analyst: System  
Sample ID: YL1-165  
Vial: N/A  
Injection Volume: 0

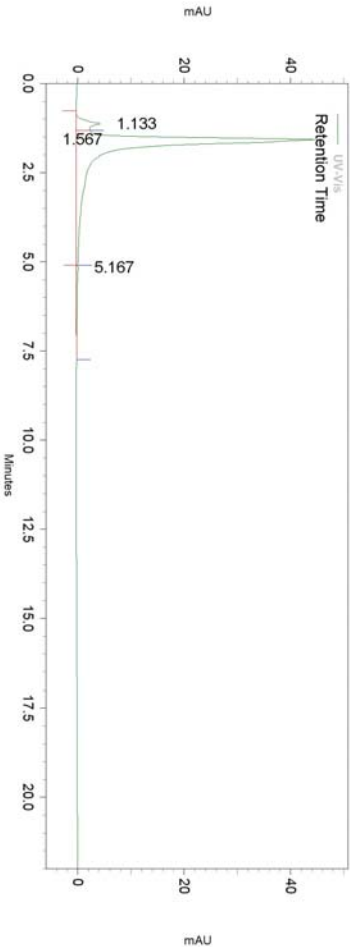

UV-Vis Results

| Name   | Retention Time | Area   | Area Percent | Integration Codes |
|--------|----------------|--------|--------------|-------------------|
|        | 1.133          | 57274  | 6.053        | BV                |
|        | 1.567          | 870590 | 92.007       | VV                |
|        | 5.167          | 18361  | 1.940        | VB                |
| Totals |                |        |              |                   |

Instrument Name: HPLC  
Acquisition Method: C:\EZStart\Projects\Default\Method\MeOH90CH3CN10for1.0-21min.met  
Sequence: C:\HPLC\data\Dan\abc.seq  
Software Version: Version 3.1.7



## HRMS 10e

## Empirical Formula Confirmation Report

Page 1 of 1

Sample Name: YL1-165 Sample Location: P1-E-06 Sample Id: YL1-165 Operator: EasyAccess  
Data File Name: D:\PE Sciex Data\Projects\chemist\03-08\Data\040308-NEG-00464.wiff Acq Time: March 04 2008, 03:04:31 PM  
Method: D:\TOF\_Data\damethods\EASY ACCESS2.ANM\efc.xml

One or more scans have failed IRM. Review the data file for details.

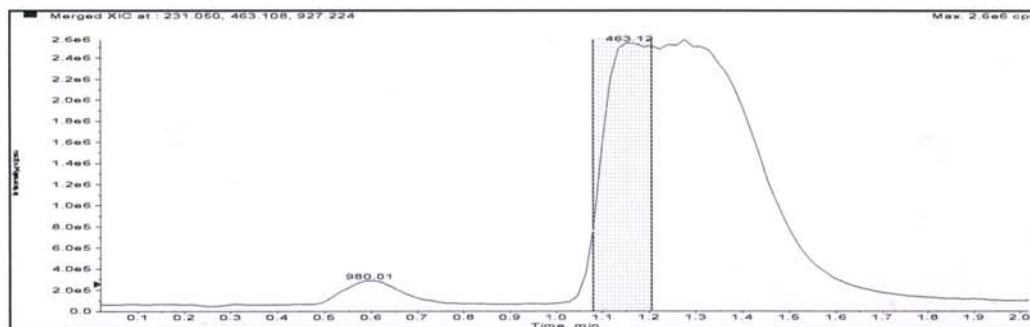

Merged XIC, Period#: 1 Experiment#: 1

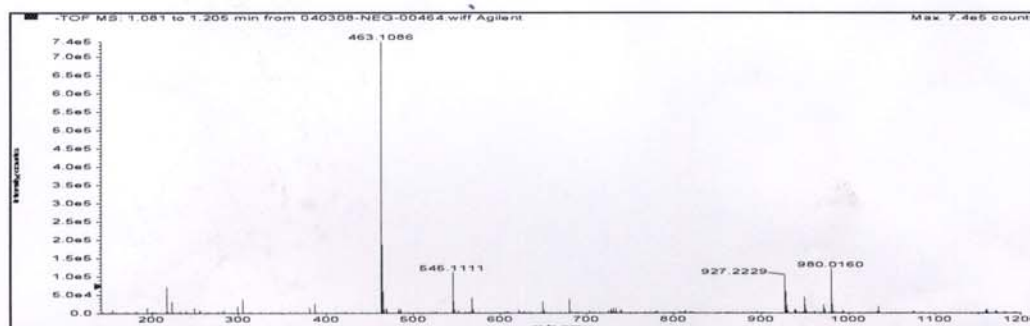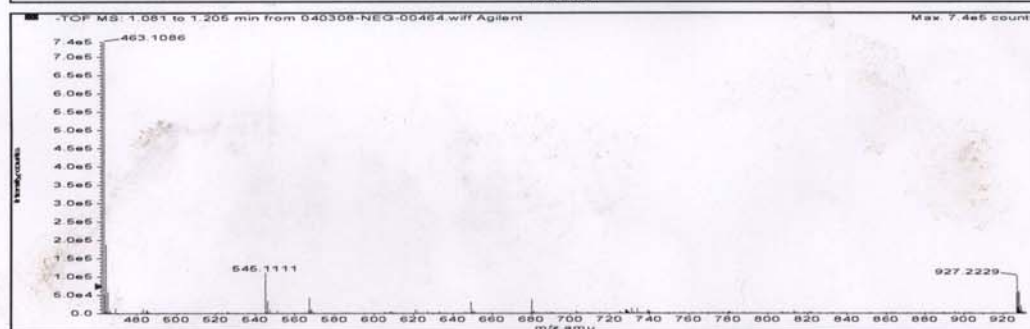

| Formula     | Compound name | Mass      | Peak RT (min) | Peak area  | Description |
|-------------|---------------|-----------|---------------|------------|-------------|
| C23H20N4O5S | --            | 464.11544 | 1.16          | 6.20222 E6 | --          |

| Species | Abundance (counts) | Ion Mass  | Measured Mass | Error (mDa) | Error (ppm) | Ret. Time Error (min) |
|---------|--------------------|-----------|---------------|-------------|-------------|-----------------------|
| [M-H]-  | 755869.66          | 463.10816 | 463.10865     | 0.48311     | 1.04        | --                    |
| [2M-H]- | 101897.20          | 927.22360 | 927.22291     | -0.69289    | -0.75       | --                    |

Tuesday, March 04, 2008

15:06:44 PM



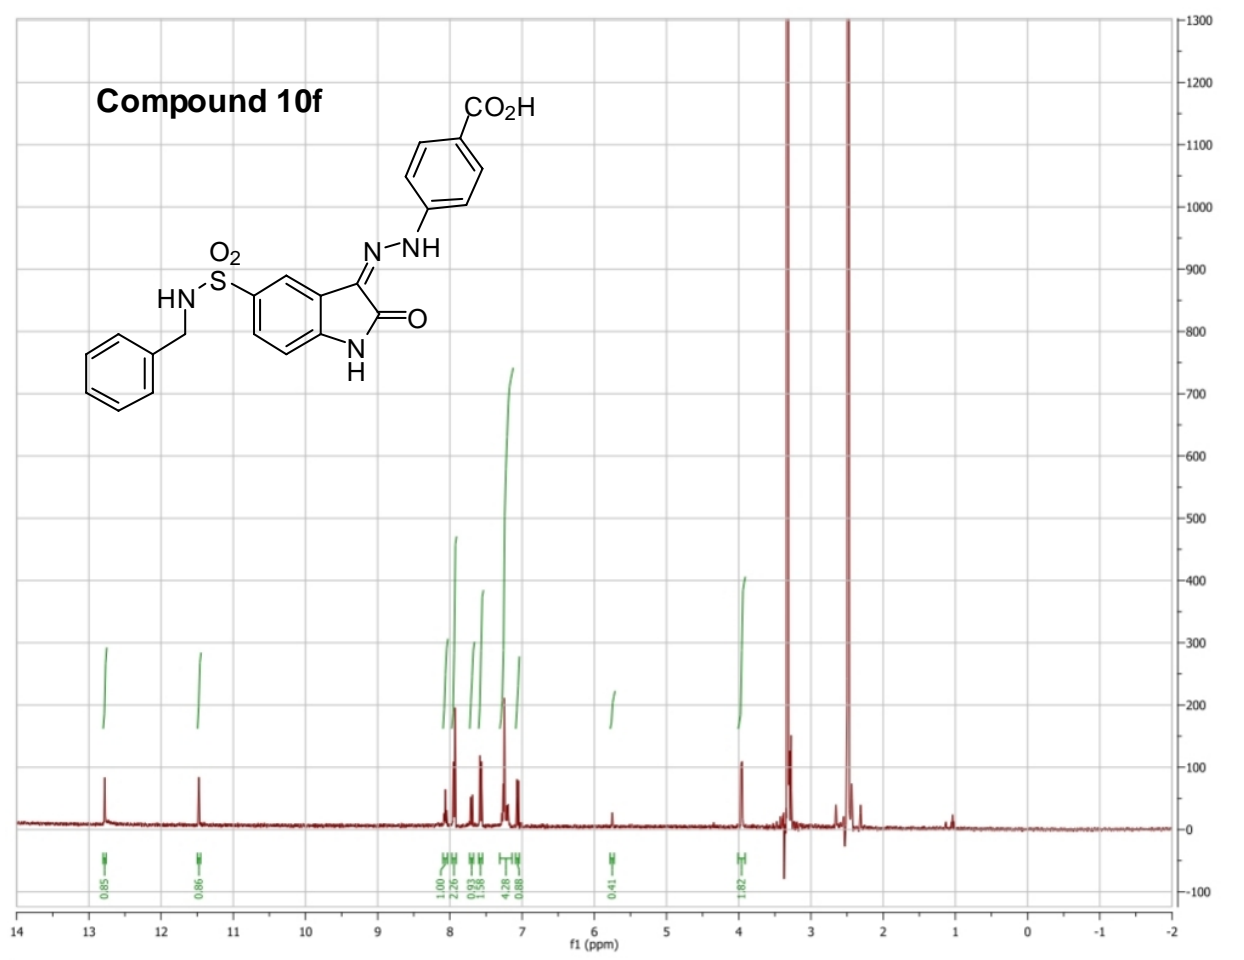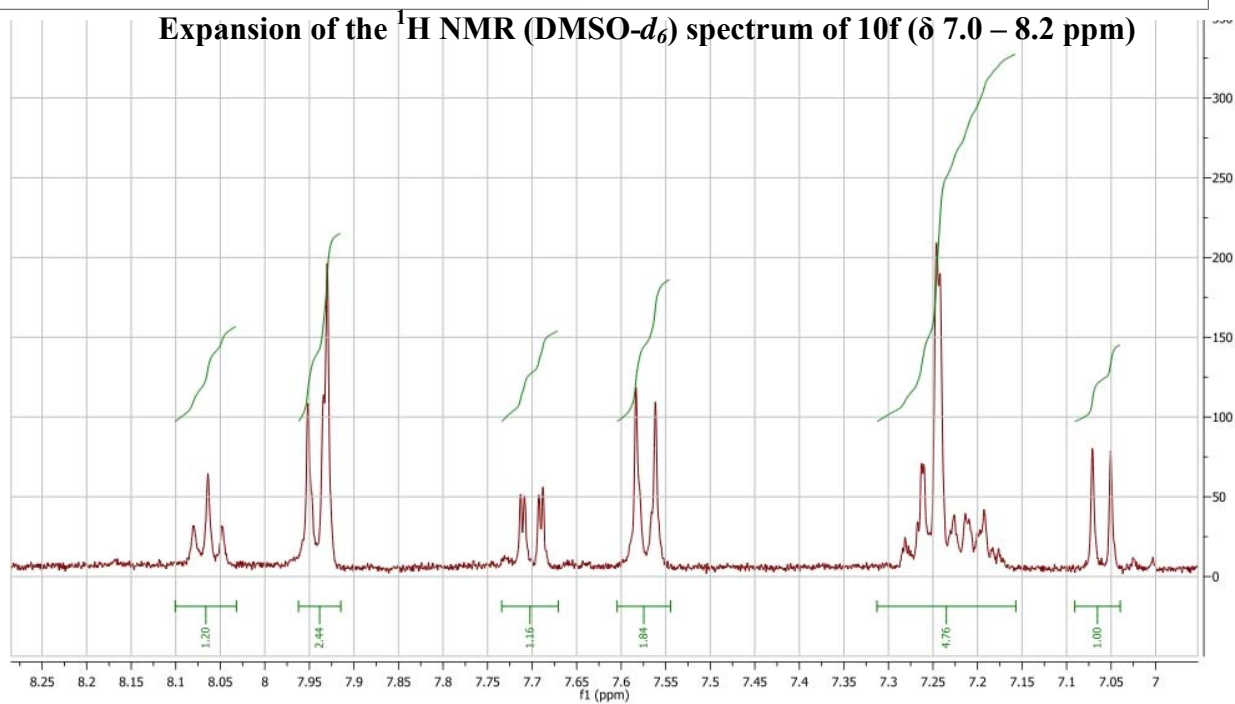

HPLC 10f

Area Percent Report

data\Yuning\YL1-162\System10-22-2007 4-26-48 PM.dat  
Acquired: 10/22/2007 4:27:15 PM

Page 1 of 2 Data File: C:\HPLC  
Printed: 10/22/2007 4:49:36 PM

Analyst: System  
Sample ID: YL1-162  
Vial: N/A  
Injection Volume: 0

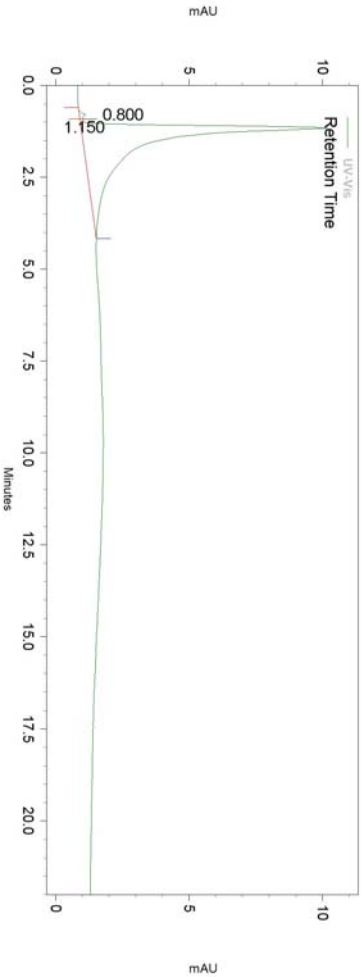

UV-Vis Results

| Name | Retention Time | Area   | Area Percent | Integration Codes |
|------|----------------|--------|--------------|-------------------|
|      | 0.800          | 1769   | 0.664        | BV                |
|      | 1.150          | 264762 | 99.336       | VB                |

|        |  |        |         |  |
|--------|--|--------|---------|--|
| Totals |  | 266531 | 100.000 |  |
|--------|--|--------|---------|--|

Instrument Name: HPLC  
Acquisition Method: C:\EZStart\Projects\Default\Method\McOH90CH3CN10fr1.5-21min.met  
Sequence: C:\HPLC\data\Danabc.seq  
Software Version: Version 3.1.7

## HRMS 10f

## Empirical Formula Confirmation Report

Page 1 of 1

Sample Name: YL1-162 Sample Location: P1-A-01 Sample Id: YL1-162 Operator: EasyAccess  
Data File Name: D:\PE Sciex Data\Projects\chemist\03-08\Data\040308-NEG-00423.wiff Acq Time: March 04 2008, 12:07:31 PM  
Method: D:\TOF\_Data\amethods\EASY ACCESS2.ANM\efc.xml

One or more scans have failed IRM. Review the data file for details.

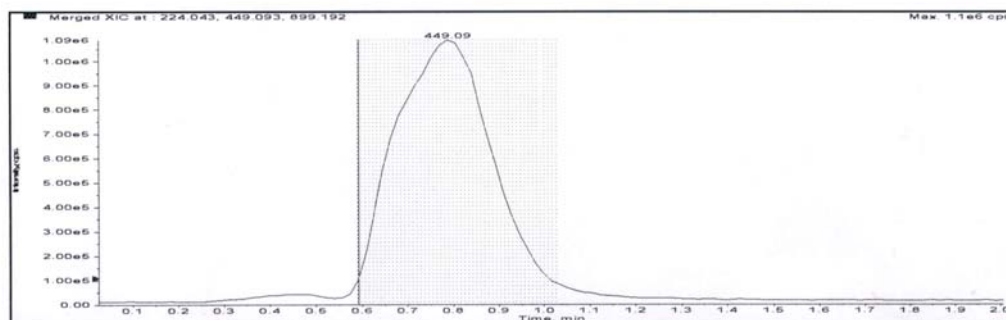

Merged XIC, Period#: 1 Experiment#: 1

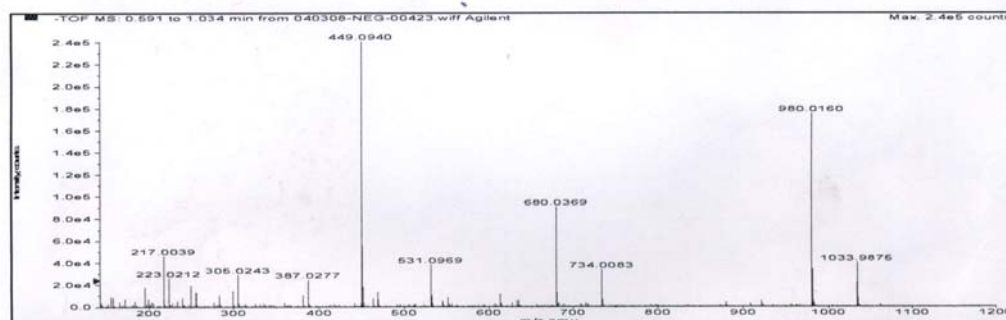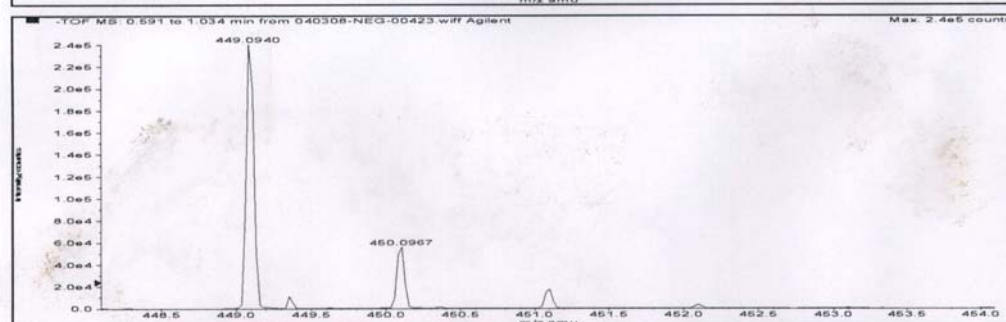

| Formula     | Compound name | Mass      | Peak RT (min) | Peak area  | Description |
|-------------|---------------|-----------|---------------|------------|-------------|
| C22H18N4O5S | --            | 450.09979 | 0.79          | 1.61046 E7 | --          |

| Species | Abundance (counts) | Ion Mass  | Measured Mass | Error (mDa) | Error (ppm) | Ret. Time Error (min) |
|---------|--------------------|-----------|---------------|-------------|-------------|-----------------------|
| [M-H]-  | 249165.16          | 449.09251 | 449.09404     | 1.52622     | 3.40        | --                    |

Tuesday, March 04, 2008

12:09:46 PM

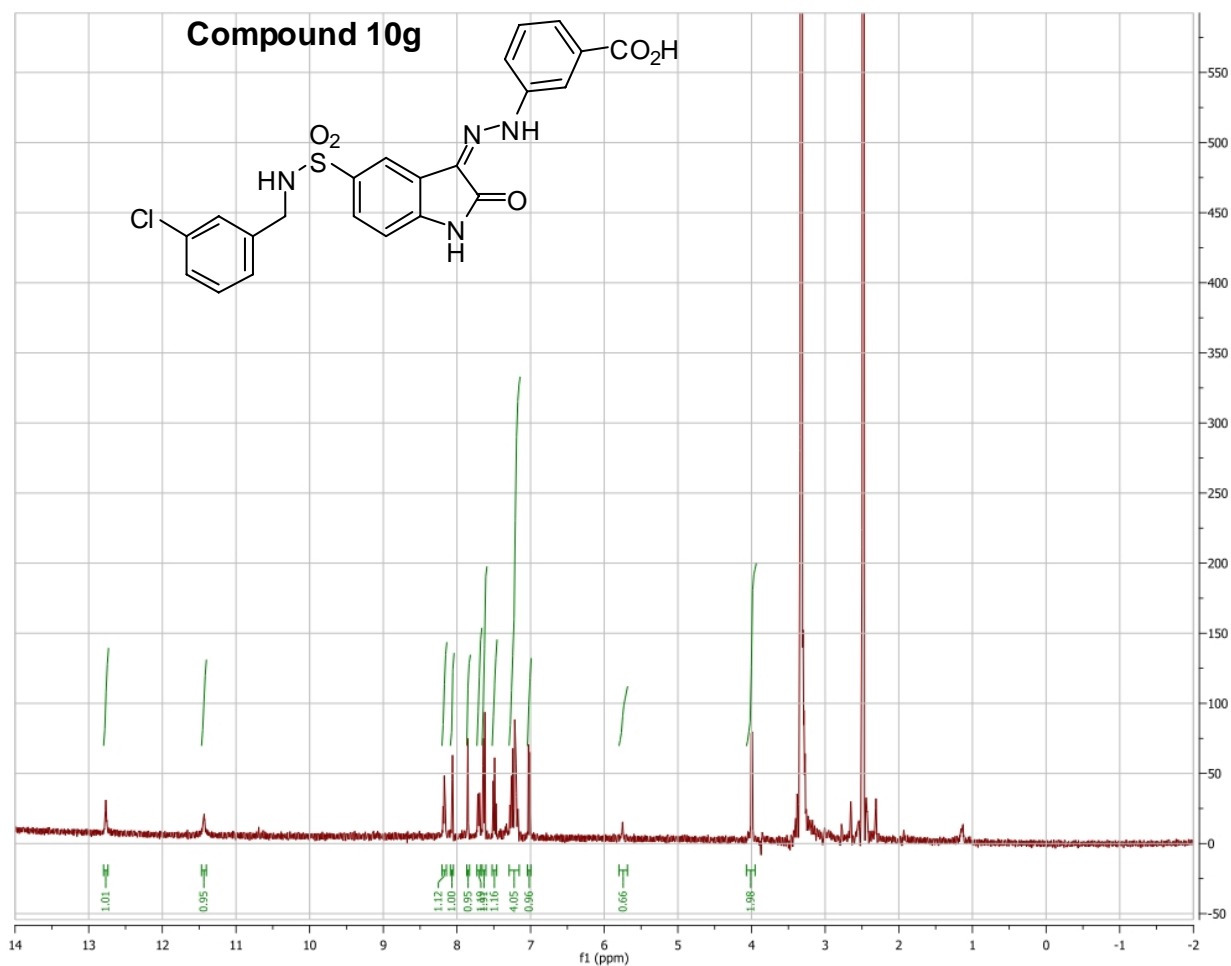

Expansion of the <sup>1</sup>H NMR (DMSO-*d*<sub>6</sub>) spectrum of 10g (δ 6.7 – 8.4 ppm)

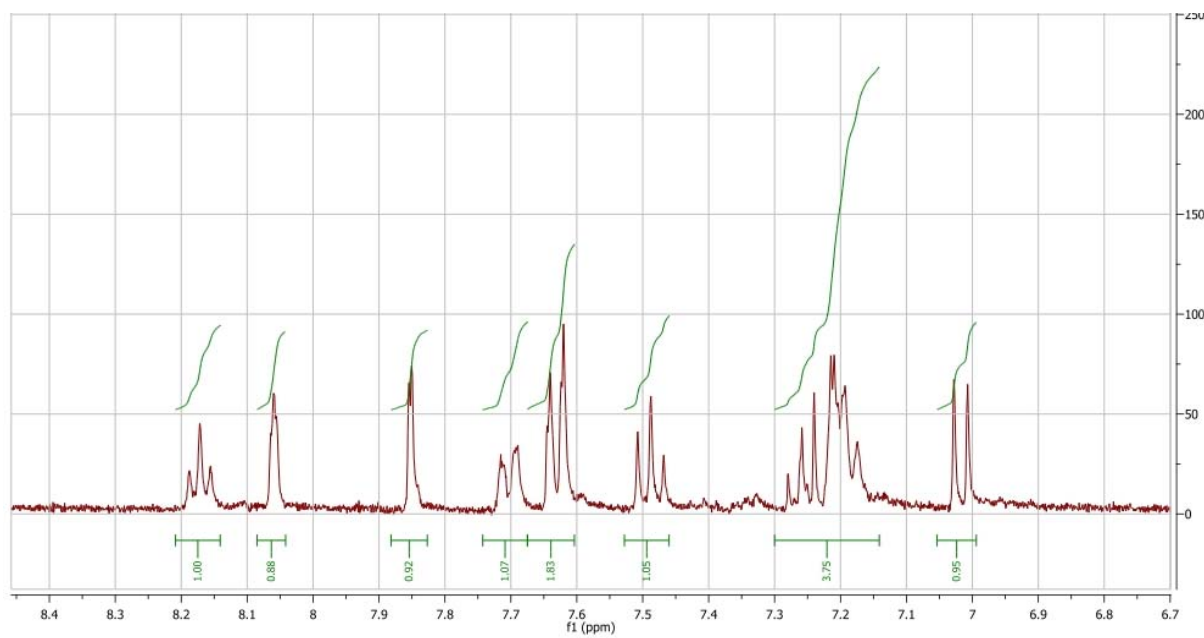

HPLC 10g

Area Percent Report

data\Yuning\YL1-168-2\System10-22-2007 2-48-50 PM.dat  
Acquired: 10/22/2007 2:49:29 PM

Page 1 of 2 Data File: C:\HPLC  
Printed: 10/22/2007 3:19:53 PM

Analyst: System  
Sample ID: YL1-168-2      Vial: N/A      Injection Volume: 0

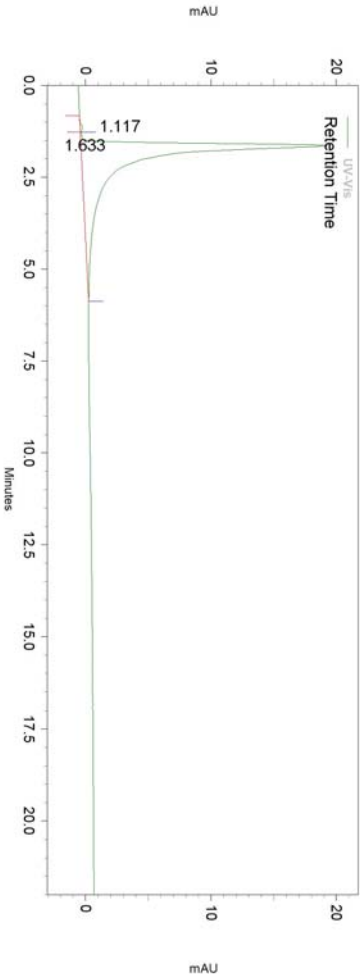

UV-Vis Results

| Name | Retention Time | Area   | Area Percent | Integration Codes |
|------|----------------|--------|--------------|-------------------|
|      | 1.117          | 2100   | 0.395        | BV                |
|      | 1.633          | 529752 | 99.605       | VB                |

|        |  |        |         |  |
|--------|--|--------|---------|--|
| Totals |  | 531852 | 100.000 |  |
|--------|--|--------|---------|--|

Instrument Name: HPLC      Software Version: Version 3.1.7  
Acquisition Method: C:\EZStart\Projects\Default\Method\MeOH90CH3CN10Fr1.0-21min.met  
Sequence: C:\HPLC\data\Danabc.seq

## HRMS 10g

## Empirical Formula Confirmation Report

Page 1 of 1

Sample Name: YL1-168-2 Sample Location: P1-A-99 Sample Id: YL1-168-2 Operator: EasyAccess  
Data File Name: D:\PE Sciex Data\Projects\chemist\10-07\Data\231007-NEG-01610.wiff Acq Time: October 23 2007, 11:01:41 AM  
Method: D:\TOF\_Data\damethods\EASY ACCESS2.ANM\efc.xml

One or more scans have failed IRM. Review the data file for details.

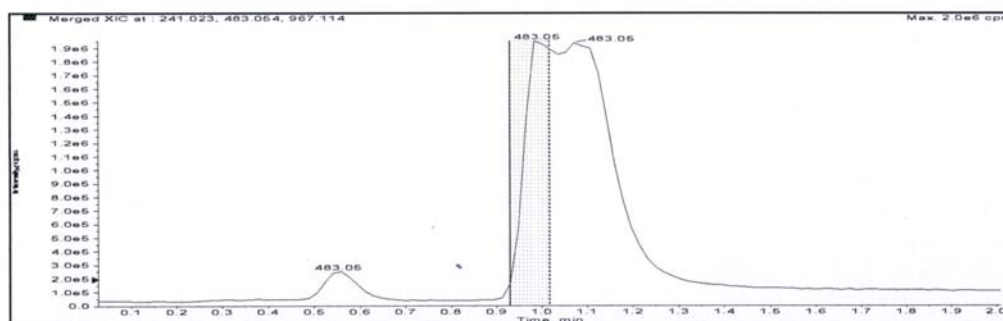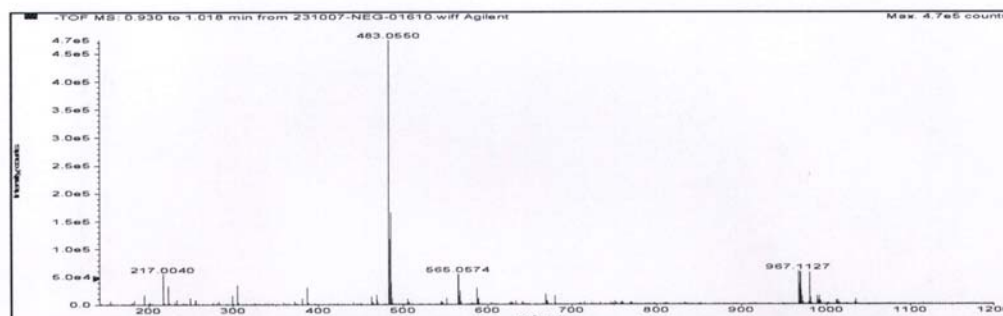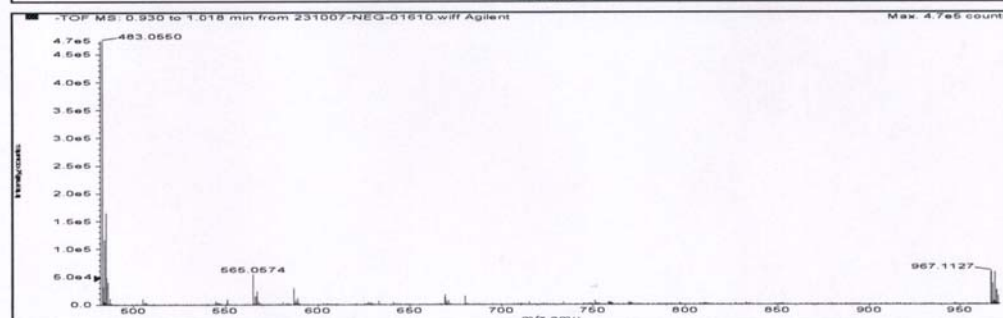

| Formula       | Compound name | Mass      | Peak RT (min) | Peak area  | Description |
|---------------|---------------|-----------|---------------|------------|-------------|
| C22H17CIN4O5S | --            | 484.06082 | 0.99          | 8.92037 E6 | --          |

| Species | Abundance (counts) | Ion Mass  | Measured Mass | Error (mDa) | Error (ppm) | Ret. Time Error (min) |
|---------|--------------------|-----------|---------------|-------------|-------------|-----------------------|
| [M-H]-  | 477852.28          | 483.05354 | 483.05504     | 1.50313     | 3.11        | --                    |
| [2M-H]- | 60135.58           | 967.11436 | 967.11270     | -1.65583    | -1.71       | --                    |

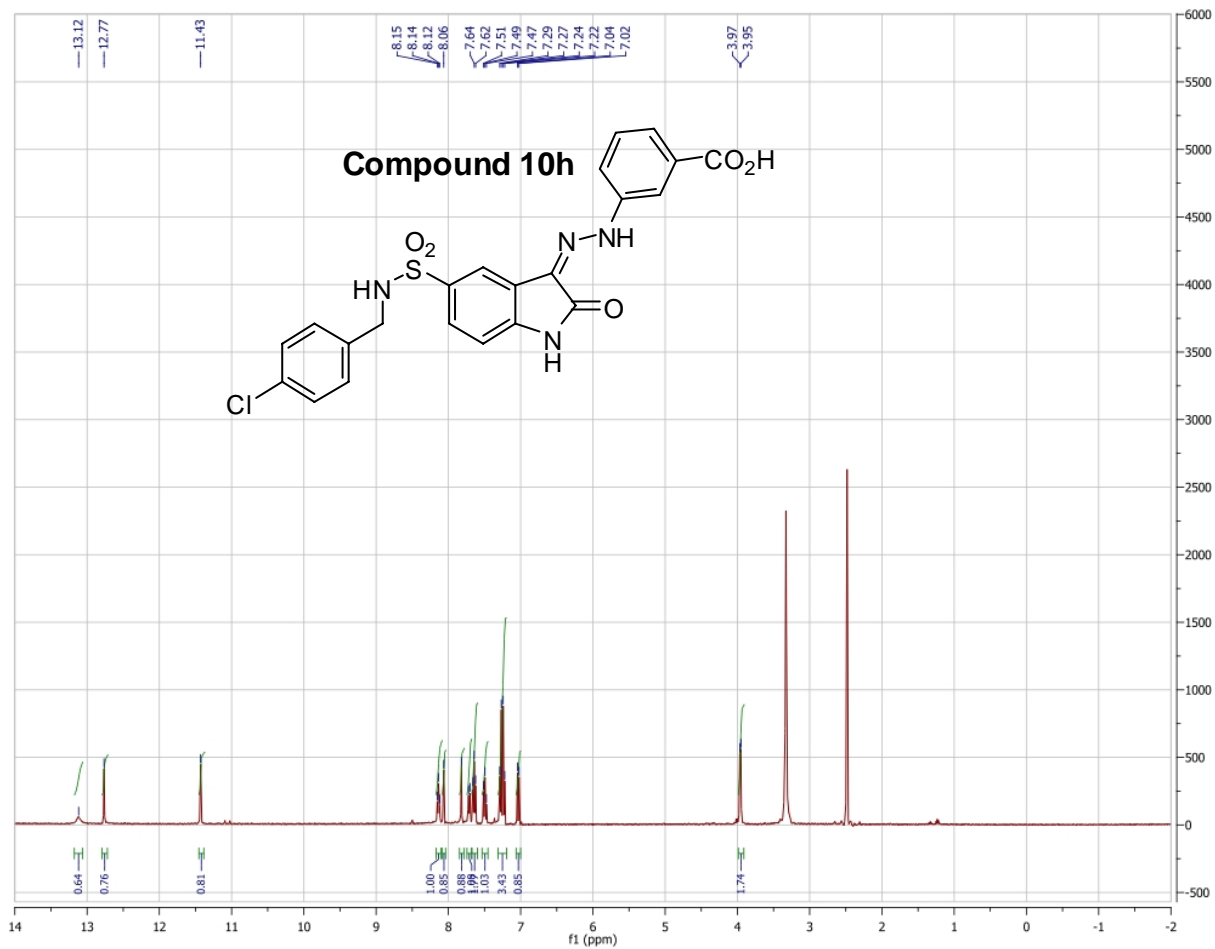

Expansion of the  $^1\text{H}$  NMR ( $\text{DMSO}-d_6$ ) spectrum of 10h ( $\delta$  7.0 – 8.2 ppm)

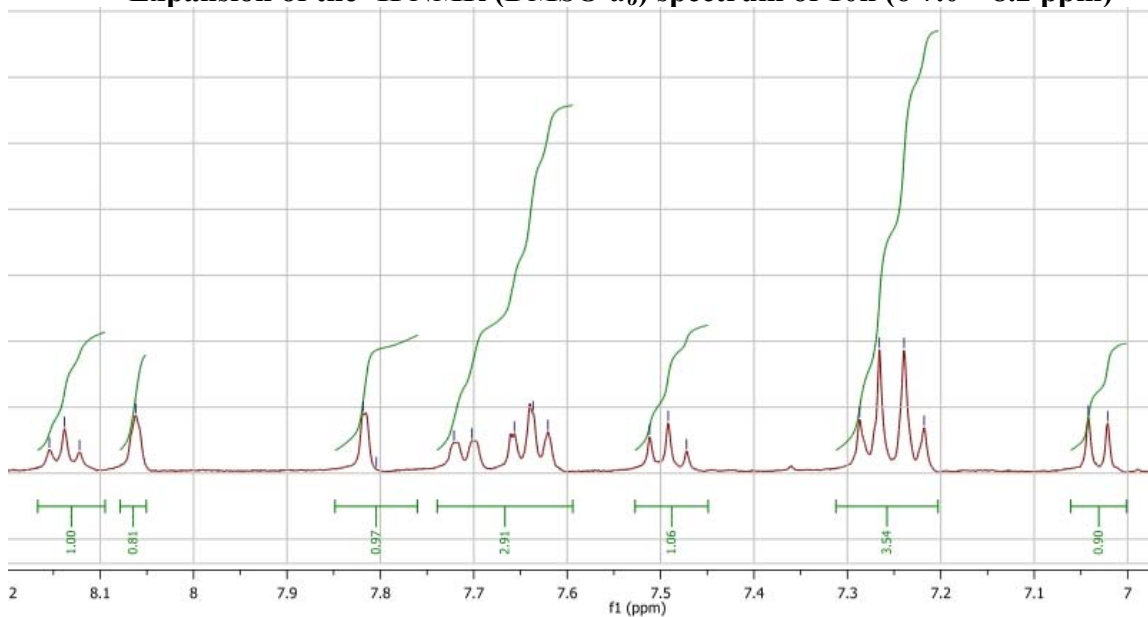



## HPLC 10h

## Area Percent Report

Page 1 of 2 Data File: C:\HPLC

data\Roberta\RPMT744a\System11-27-2007 6-08-22 PM.dat  
Acquired: 11/27/2007 6:09:02 PM

Printed: 11/27/2007 6:33:42 PM

Analyst: System  
Sample ID: RPMT744a

Vial: N/A

Injection Volume: 0

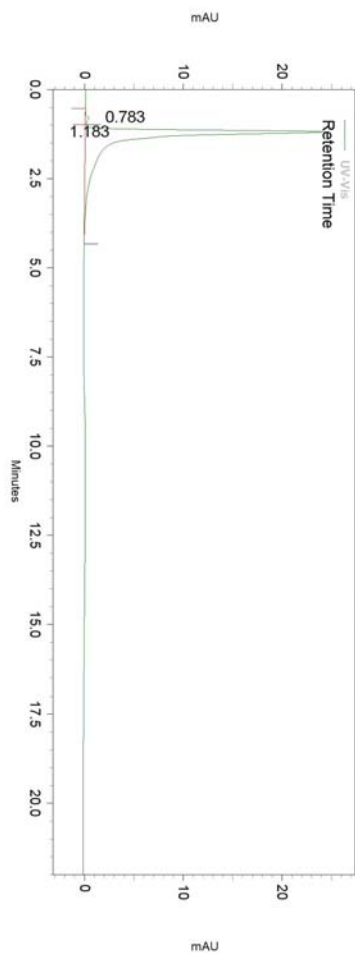

## UV-Vis Results

| Name   | Retention Time | Area   | Area Percent | Integration Codes |
|--------|----------------|--------|--------------|-------------------|
|        | 0.783          | 3580   | 1.013        | BV                |
|        | 1.183          | 349753 | 98.987       | VB                |
| Totals |                | 353333 | 100.000      |                   |

Instrument Name: HPLC  
Acquisition Method: C:\EZStart\Projects\Default\Method\MeOH90CH3CN10fr1.5-21min.met  
Sequence: C:\HPLC\data\Dan\abc.seq  
Software Version: Version 3.1.7



## HRMS 10h

## Empirical Formula Confirmation Report

Page 1 of 1

Sample Name: YL1-170-2 Sample Location: P1-E-04 Sample Id: YL1-170-2 Operator: EasyAccess  
Data File Name: D:\PE Sciex Data\Projects\chemist\03-08\Data\040308-NEG-00462.wiff Acq Time: March 04 2008, 02:58:32 PM  
Method: D:\TOF\_Data\damethods\EASY ACCESS2.ANM\efc.xml

One or more scans have failed IRM. Review the data file for details.

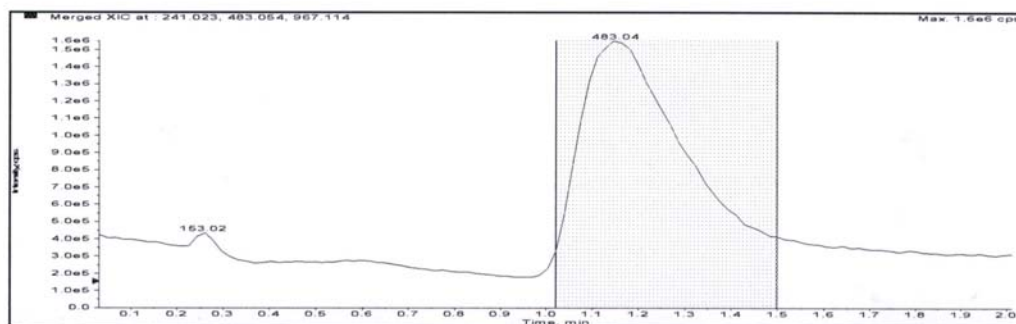

Merged XIC, Period# : 1 Experiment# : 1

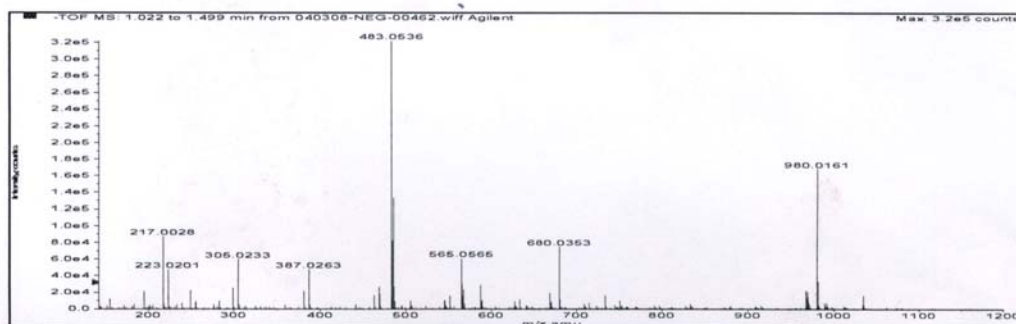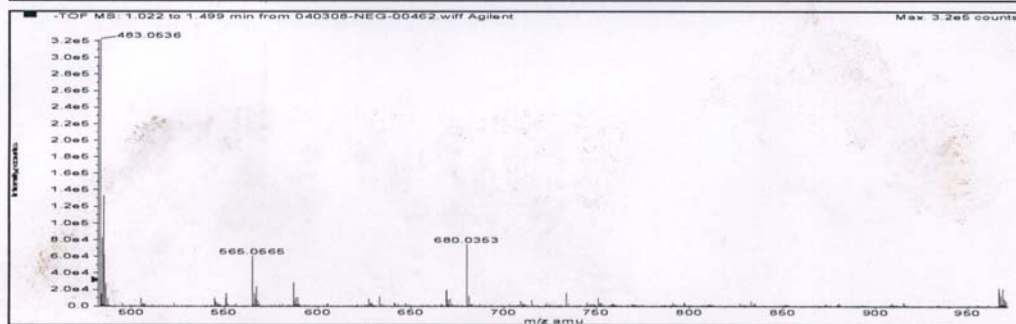

| Formula       | Compound name | Mass      | Peak RT (min) | Peak area  | Description |
|---------------|---------------|-----------|---------------|------------|-------------|
| C22H17CIN4O5S | --            | 484.06082 | 1.15          | 2.01392 E7 | --          |

| Species | Abundance (counts) | Ion Mass  | Measured Mass | Error (mDa) | Error (ppm) | Ret. Time Error (min) |
|---------|--------------------|-----------|---------------|-------------|-------------|-----------------------|
| [M-H]-  | 349261.54          | 483.05354 | 483.05360     | 0.05352     | 0.11        | --                    |
| [2M-H]- | 22423.29           | 967.11436 | 967.11369     | -0.66943    | -0.69       | --                    |

Tuesday, March 04, 2008

15:00:44 PM

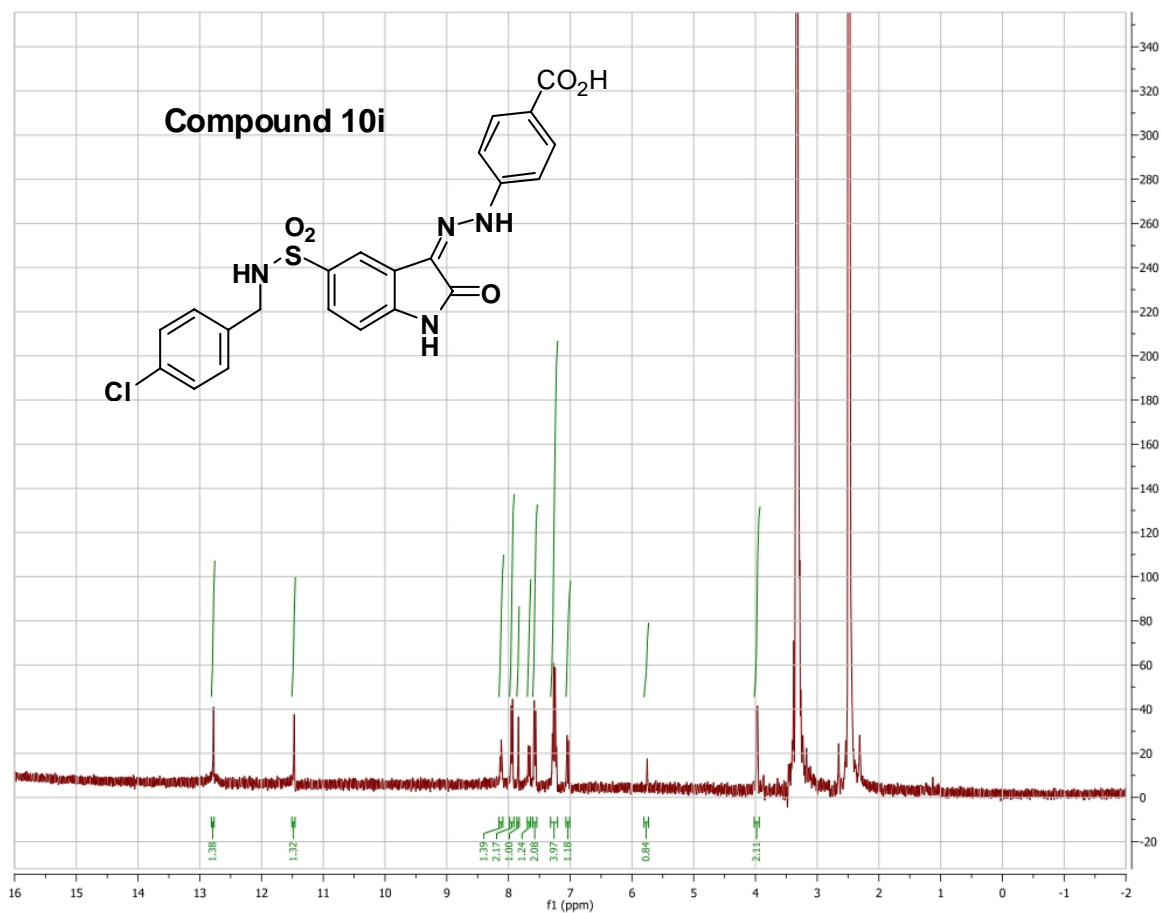

Expansion of the  $^1\text{H}$  NMR (DMSO- $d_6$ ) spectrum of 10i ( $\delta$  6.9 – 8.2 ppm)

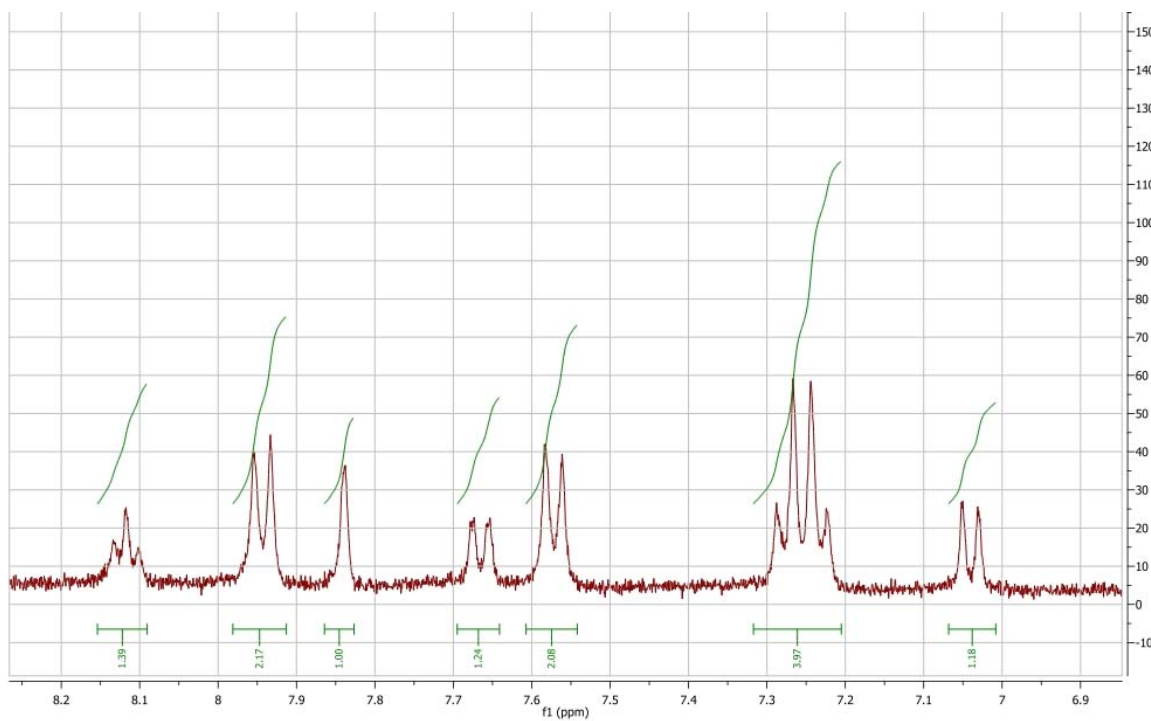

## HRMS of 10i

## Empirical Formula Confirmation Report

Page 1 of 1

Sample Name: YL1-170-1 Sample Location: P1-E-03 Sample Id: YL1-170-1 Operator: EasyAccess  
Data File Name: D:\PE Sciex Data\Projects\chemist\03-08\Data\040308-NEG-00461.wiff Acq Time: March 04 2008, 02:55:32 PM  
Method: D:\TOF\_Data\damethods\EASY ACCESS2.ANM\efc.xml

One or more scans have failed IRM. Review the data file for details.

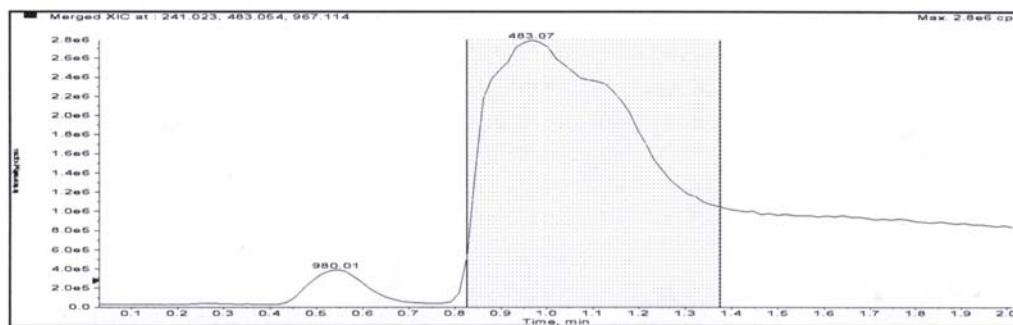

Merged XIC, Period# : 1 Experiment# : 1

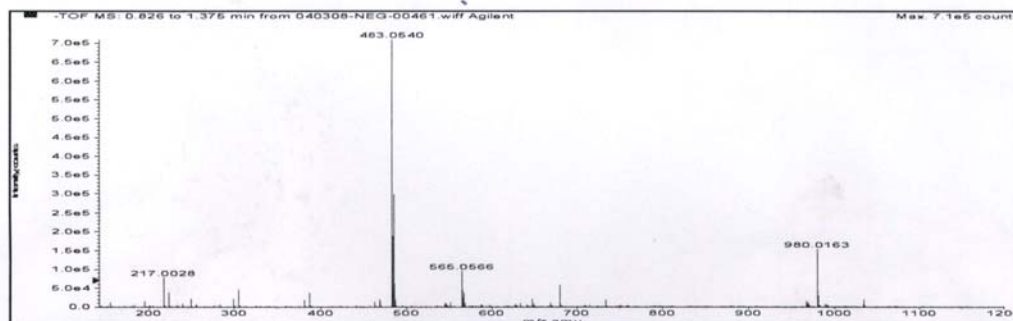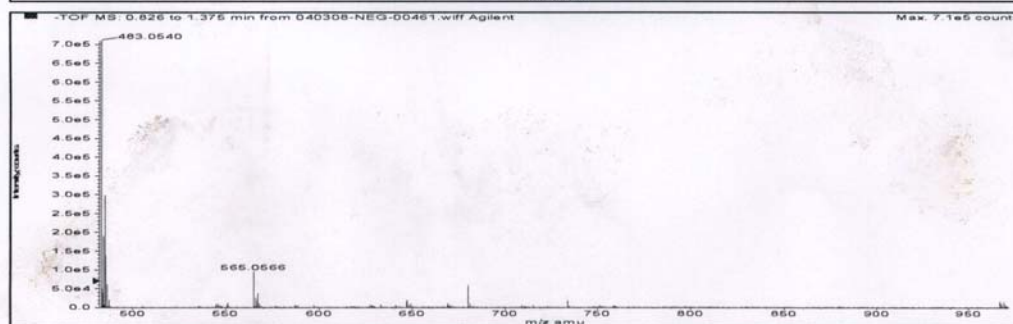

| Formula       | Compound name | Mass      | Peak RT (min) | Peak area  | Description |
|---------------|---------------|-----------|---------------|------------|-------------|
| C22H17ClN4O5S | --            | 484.06082 | 0.97          | 5.43854 E7 | --          |

| Species | Abundance (counts) | Ion Mass  | Measured Mass | Error (mDa) | Error (ppm) | Ret. Time Error (min) |
|---------|--------------------|-----------|---------------|-------------|-------------|-----------------------|
| [M-H]-  | 763172.58          | 483.05354 | 483.05402     | 0.48099     | 1.00        | --                    |
| [2M-H]- | 15788.34           | 967.11436 | 967.11382     | -0.54284    | -0.56       | --                    |

Tuesday, March 04, 2008

14:57:44 PM

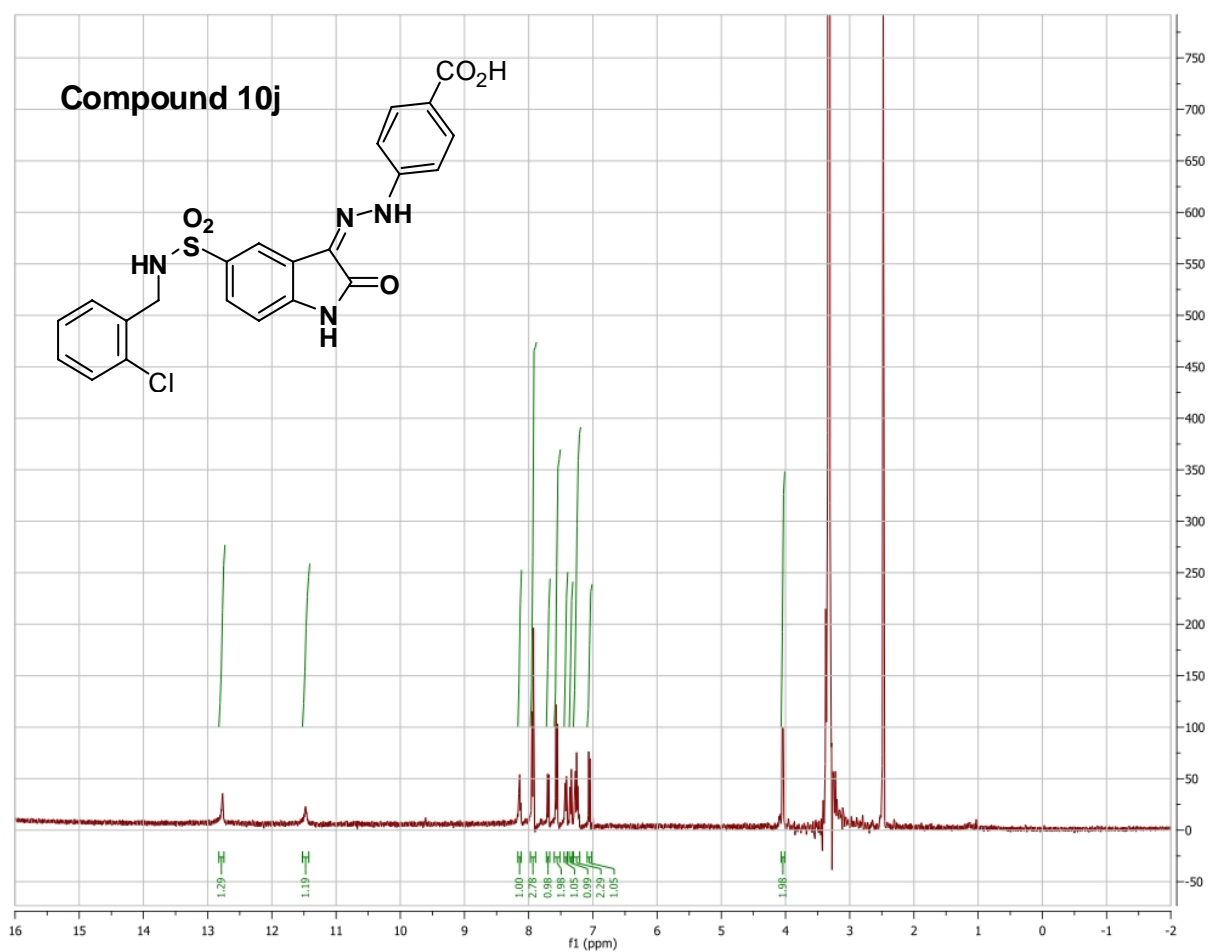

Expansion of the <sup>1</sup>H NMR (DMSO-*d*<sub>6</sub>) spectrum of 10j (δ 6.9 – 8.3 ppm)

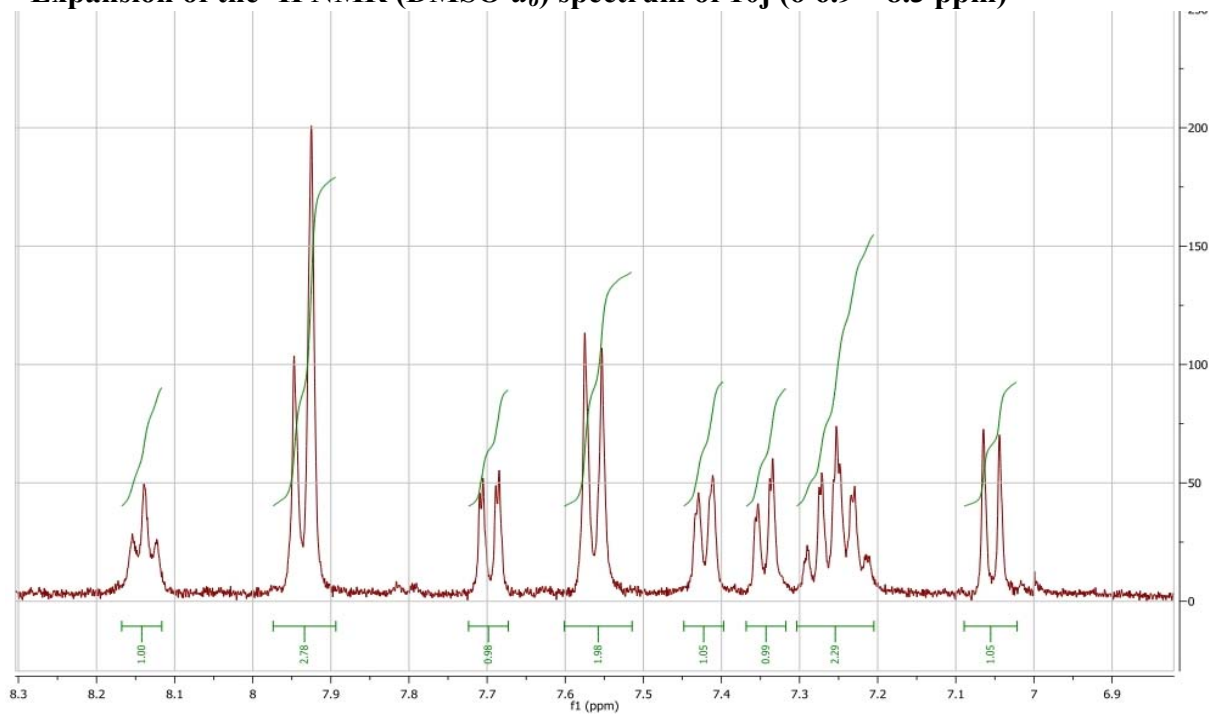

## HRMS 10j

## Empirical Formula Confirmation Report

Page 1 of 1

Sample Name: YL1-173-3 Sample Location: P1-A-07 Sample Id: YL1-173-3 Operator: EasyAccess  
Data File Name: D:\PE Sciex Data\Projects\chemist\08-07\Data\300807-NEG-01200.wiff Acq Time: August 30 2007, 09:51:08 AM  
Method: D:\TOF\_Data\damethods\EASY ACCESS2.ANMefc.xml

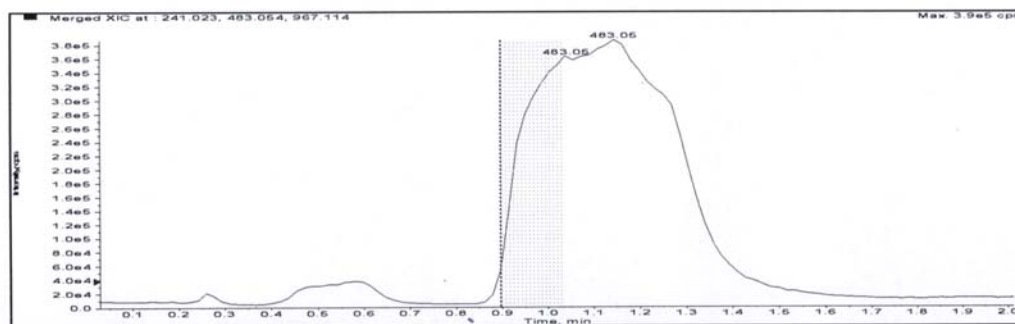

Merged XIC, Period# : 1 Experiment# : 1

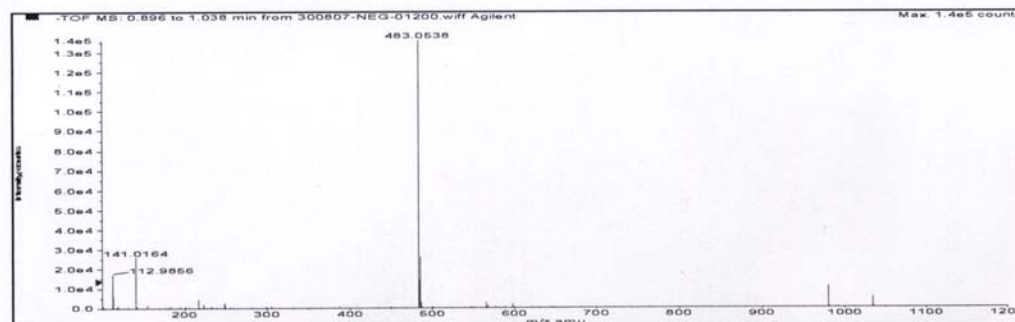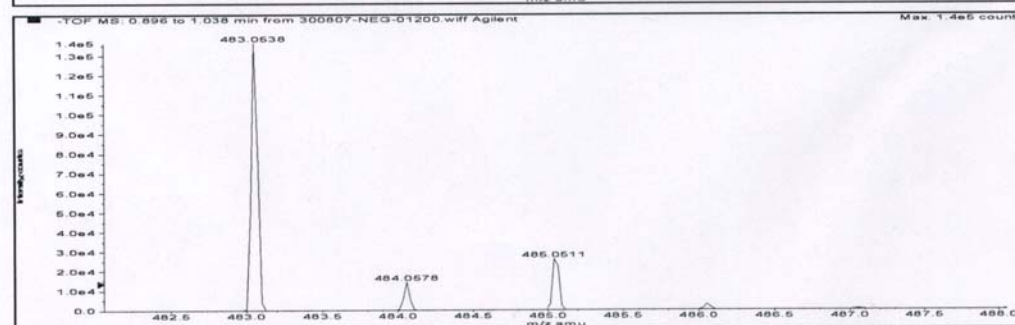

| Formula       | Compound name | Mass      | Peak RT (min) | Peak area  | Description |
|---------------|---------------|-----------|---------------|------------|-------------|
| C22H17CIN4O5S | --            | 484.06082 | 1.04          | 2.67366 E6 | --          |

| Species | Abundance (counts) | Ion Mass  | Measured Mass | Error (mDa) | Error (ppm) | Ret. Time Error (min) |
|---------|--------------------|-----------|---------------|-------------|-------------|-----------------------|
| [M-H]-  | 137020.08          | 483.05354 | 483.05376     | 0.22260     | 0.46        | --                    |



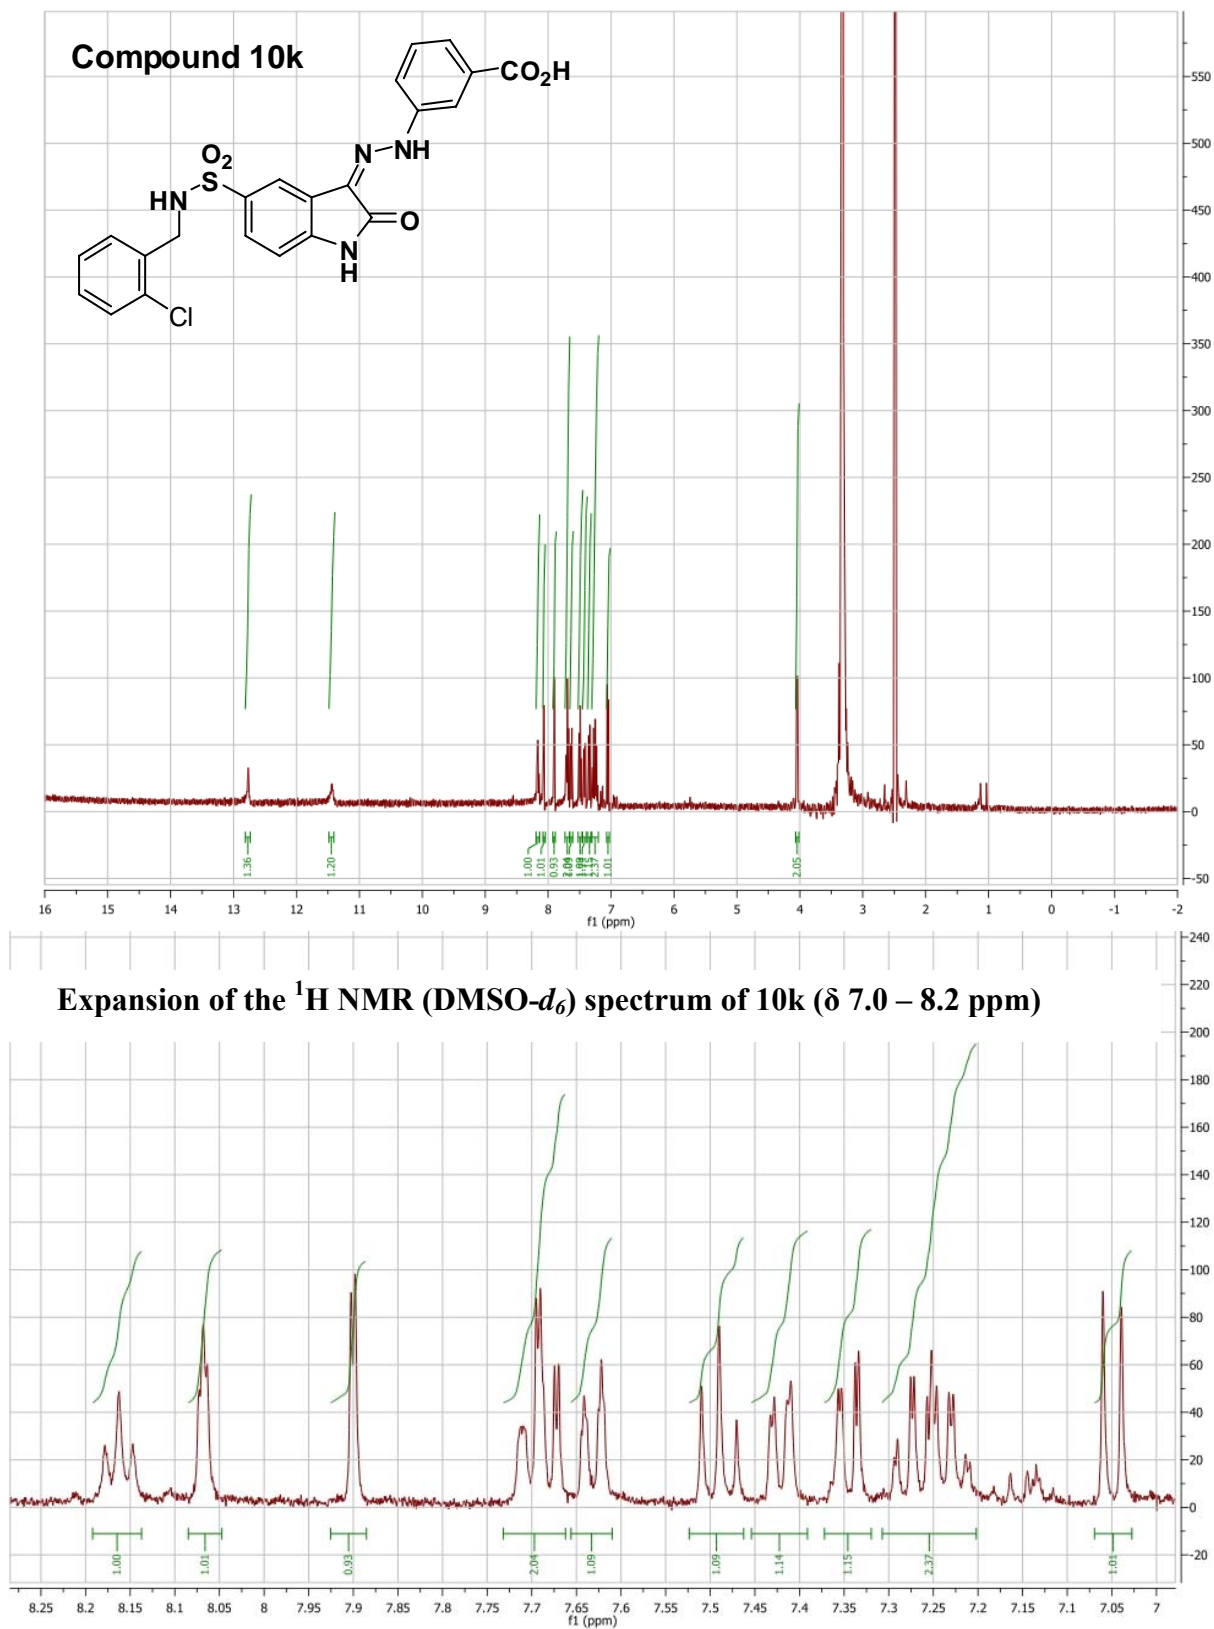

## HRMS of 10k

Sample Name: YL1-173-4 Sample Location: P1-C-06 Sample Id: YL1-173-4 Operator: EasyAccess  
Data File Name: D:\PE Sciex Data\Projects\chemist\08-07\Data\170807-NEG-01163.wiff Acq Time: August 17 2007, 04:15:47 PM  
Method: D:\TOF\_Data\damethods\EASY ACCESS2.ANM\efc.xml

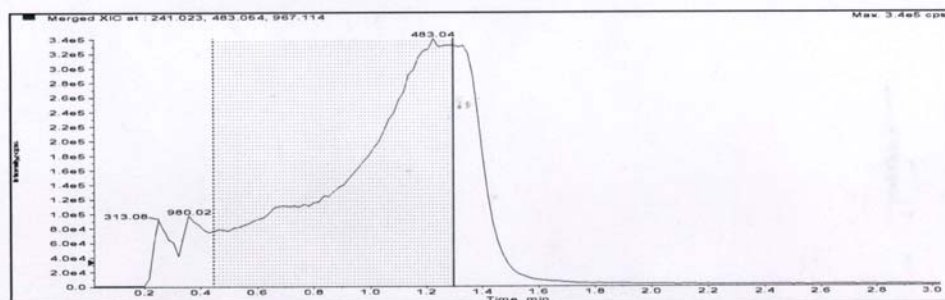

Merged XIC, Period# : 1 Experiment# : 1

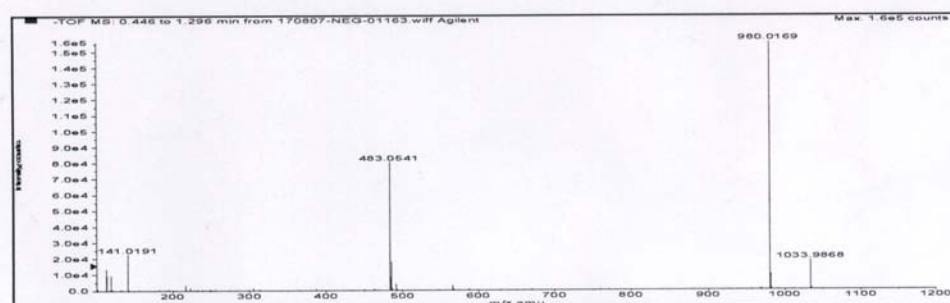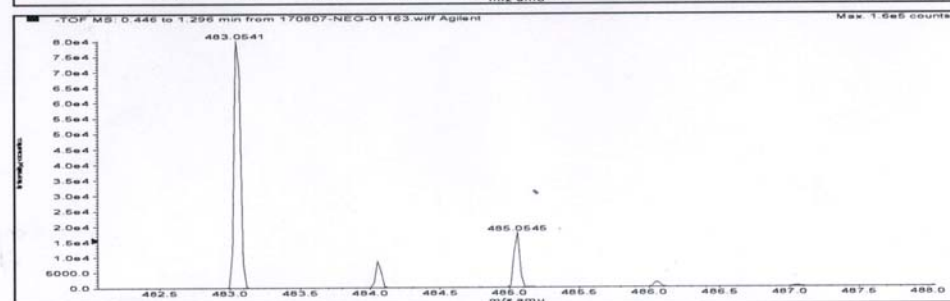

| Formula       | Compound name | Mass      | Peak RT (min) | Peak area  | Description |
|---------------|---------------|-----------|---------------|------------|-------------|
| C22H17CIN4O5S | --            | 484.06082 | 1.23          | 1.50413 E6 | --          |

| Species | Abundance (counts) | Ion Mass  | Measured Mass | Error (mDa) | Error (ppm) | Ret. Time Error (min) |
|---------|--------------------|-----------|---------------|-------------|-------------|-----------------------|
| [M-H]-  | 85713.38           | 483.05354 | 483.05406     | 0.51764     | 1.07        | --                    |

Friday, August 17, 2007

16:19:00 PM



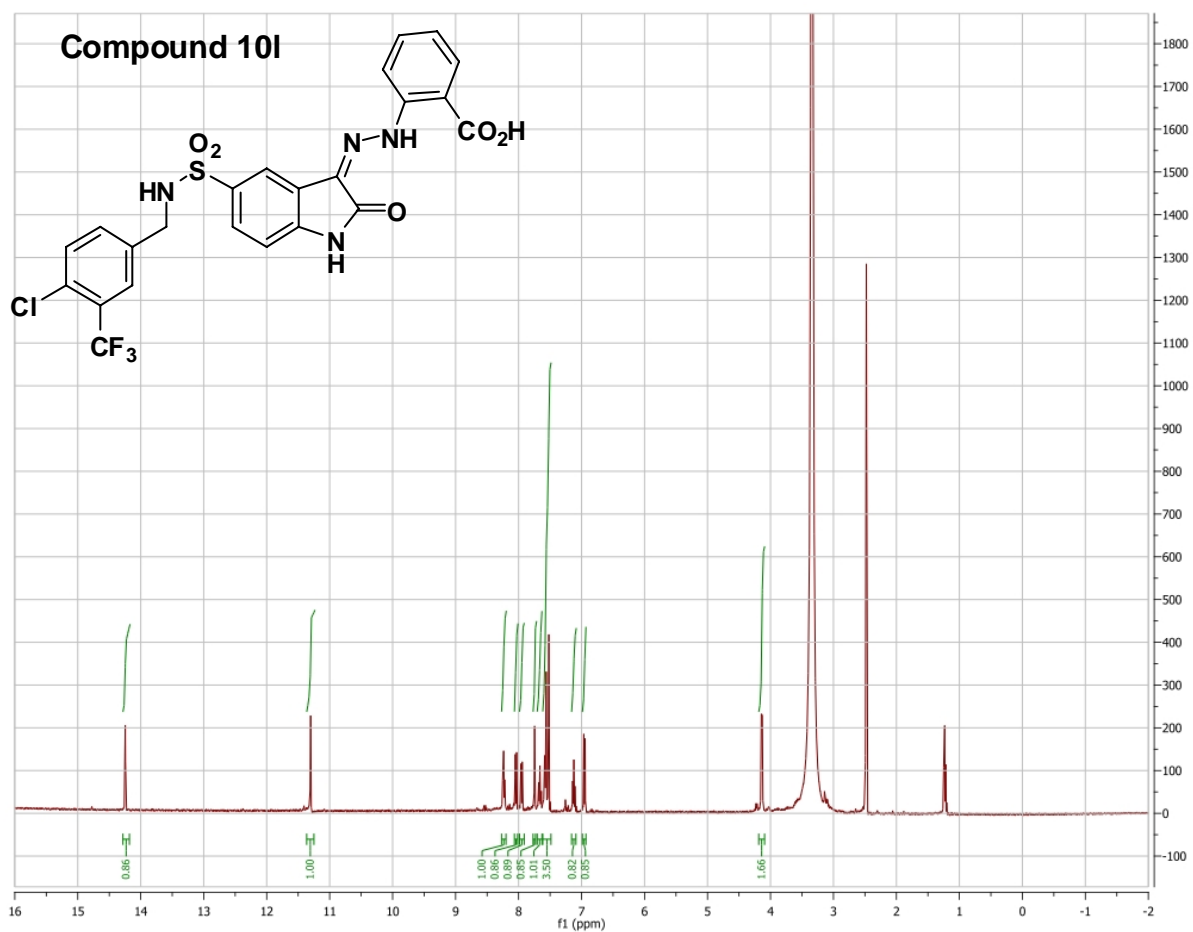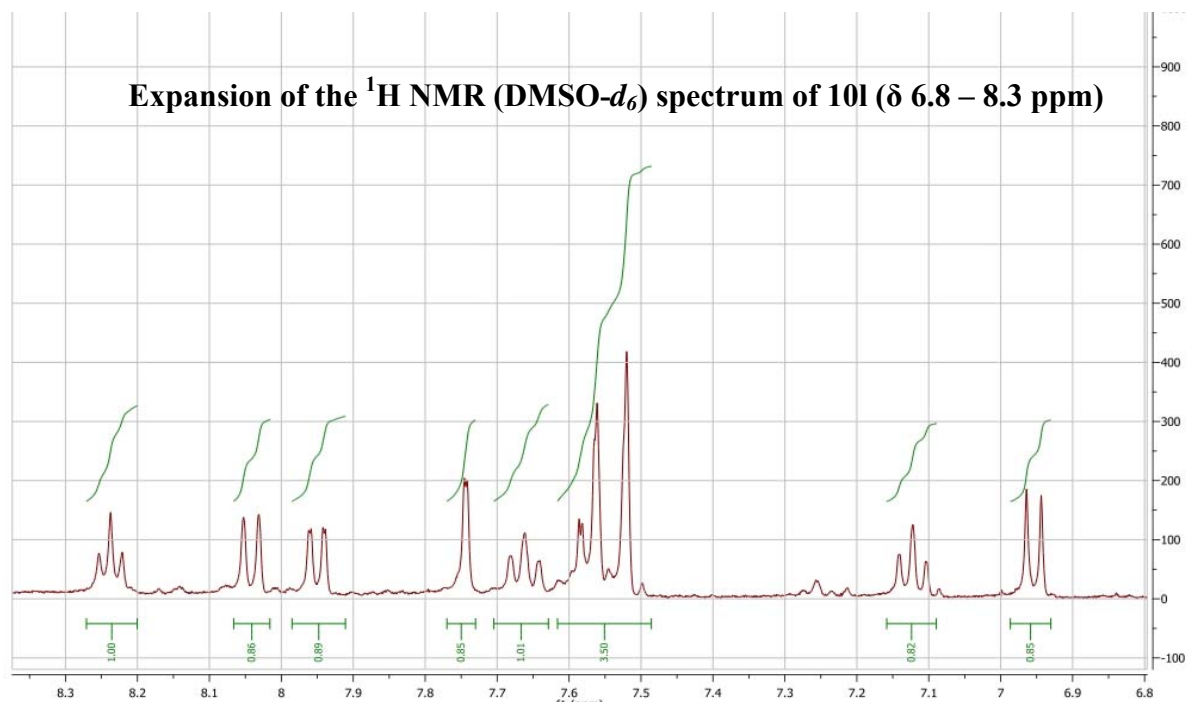

## HRMS 101

## Empirical Formula Confirmation Report

Page 1 of 1

Sample Name: YL2-008-3 Sample Location: P1-A-02 Sample Id: YL2-008-3 Operator: EasyAccess  
Data File Name: D:\PE Sciex Data\Projects\chemist\10-07\Data\051007-NEG-01530.wiff Acq Time: October 05 2007, 09:43:19 AM  
Method: D:\TOF\_Data\damethods\EASY ACCESS2.ANM\efc.xml

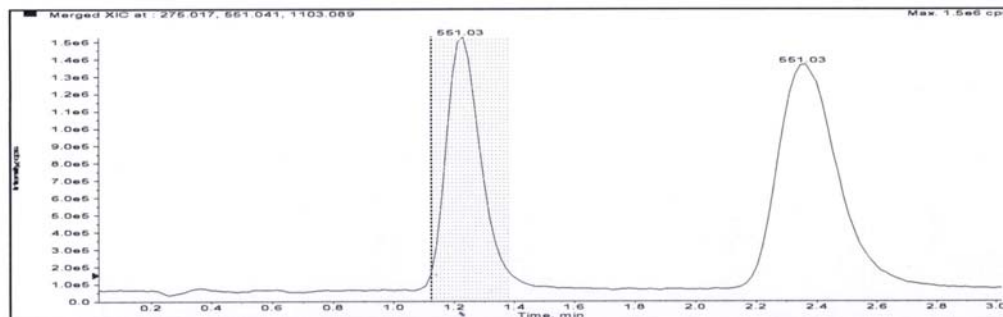

Merged XIC, Period# : 1 Experiment# : 1

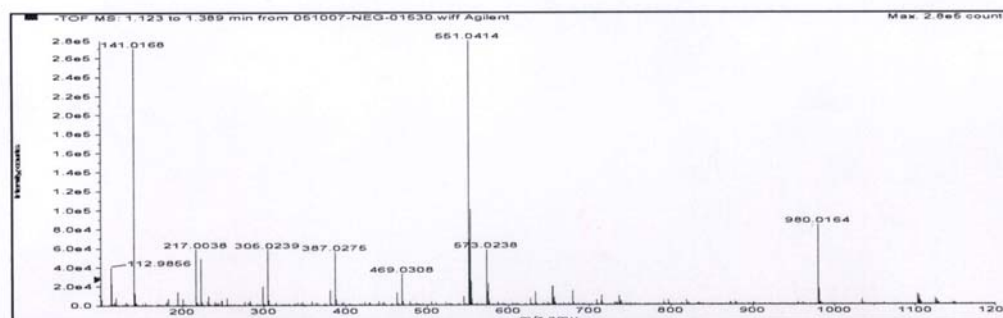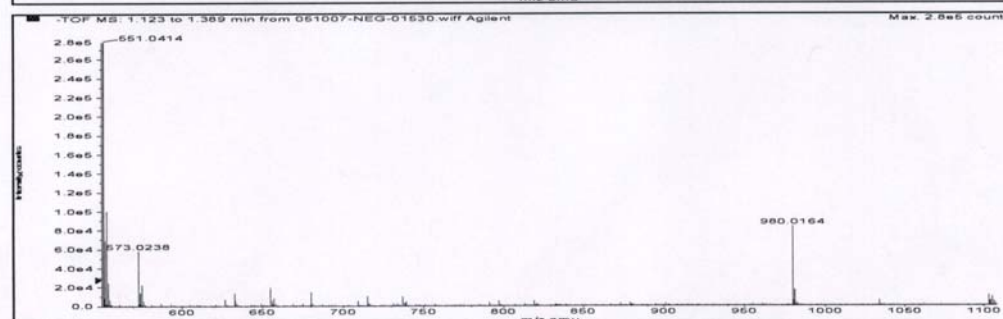

| Formula         | Compound name | Mass      | Peak RT (min) | Peak area  | Description |
|-----------------|---------------|-----------|---------------|------------|-------------|
| C23H16ClF3N4O5S | --            | 552.04820 | 1.22          | 1.16791 E7 | --          |

| Species | Abundance (counts) | Ion Mass   | Measured Mass | Error (mDa) | Error (ppm) | Ret. Time Error (min) |
|---------|--------------------|------------|---------------|-------------|-------------|-----------------------|
| [M-H]-  | 292933.00          | 551.04093  | 551.04141     | 0.48694     | 0.88        | --                    |
| [2M-H]- | 10834.40           | 1103.08913 | 1103.08750    | -1.63381    | -1.48       | --                    |

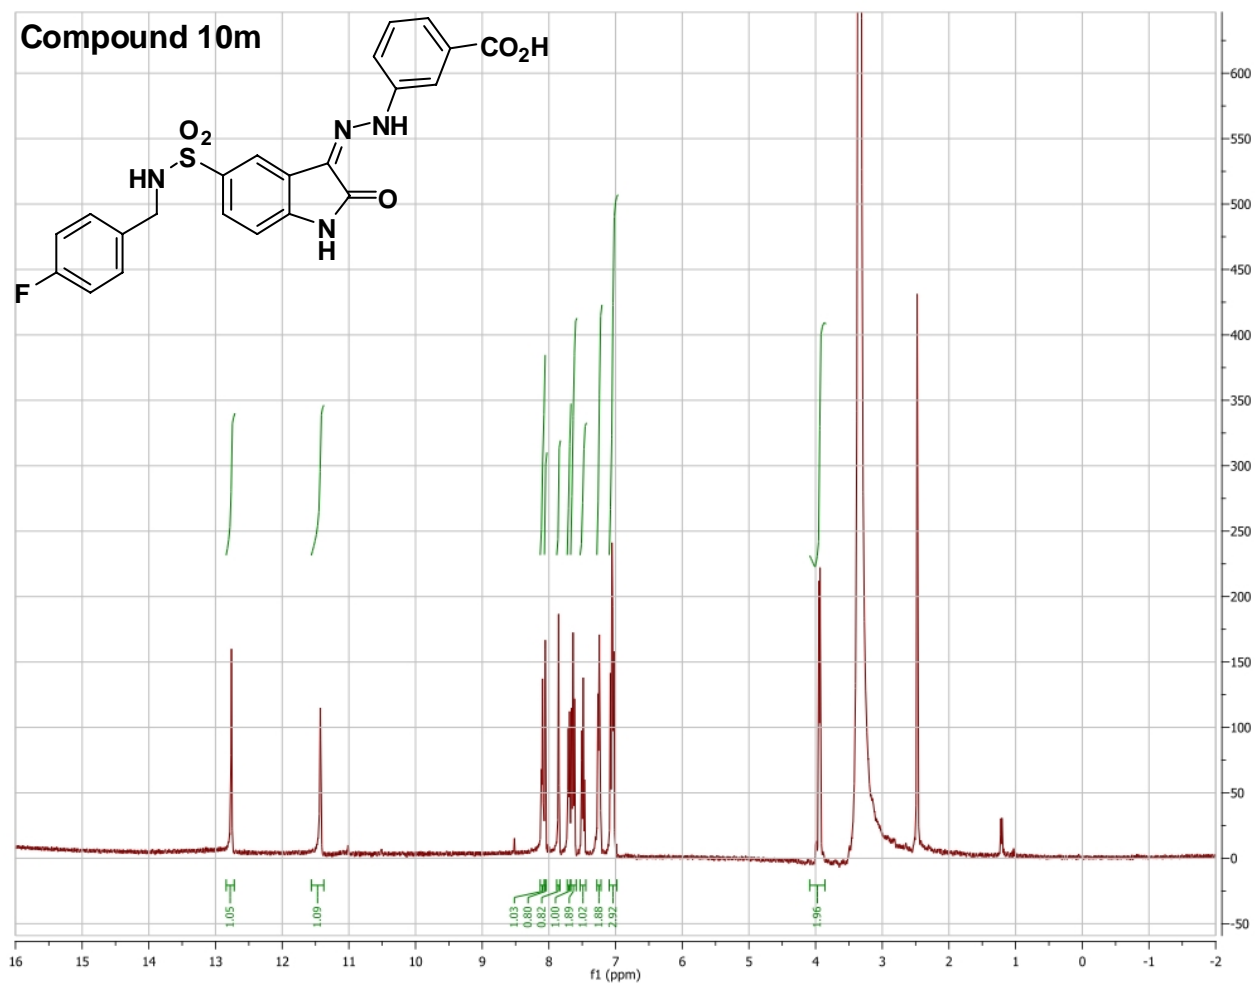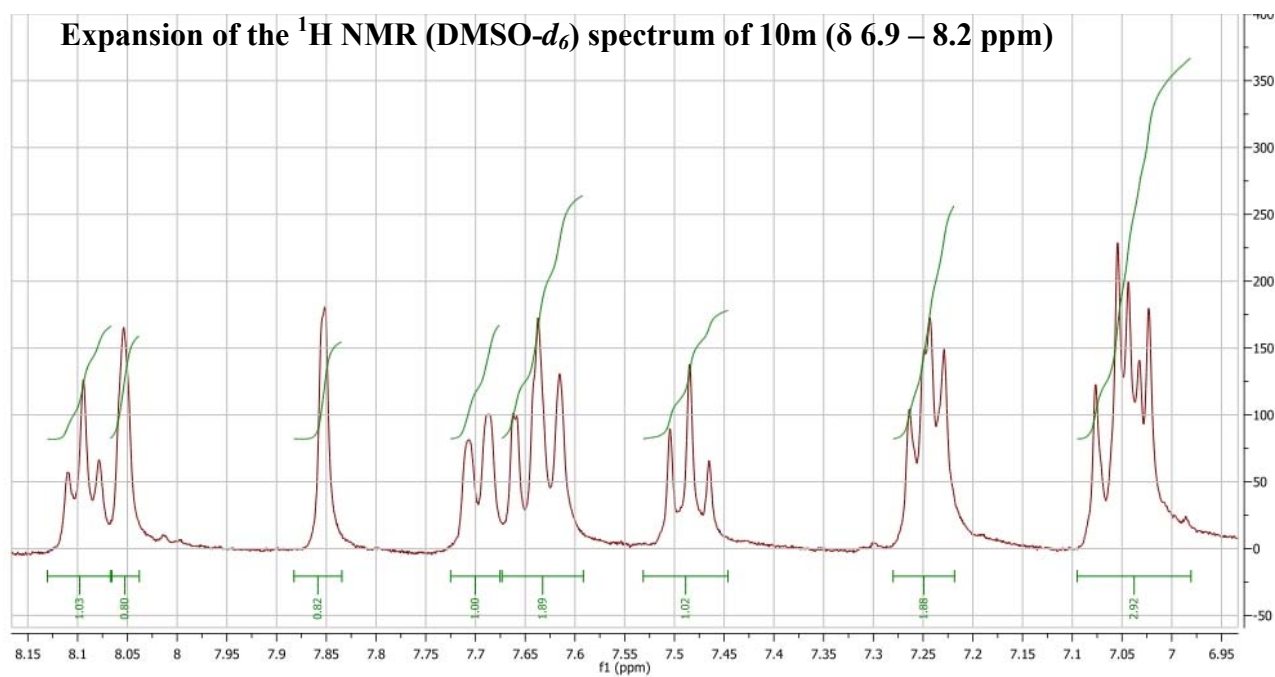

HPLC 10m

Area Percent Report

data\Yunting\YL2-011-2\System10-16-2007 4-37-18 PM.dat  
Acquired: 10/16/2007 4:37:53 PM

Page 1 of 2 Data File: C:\HPLC

Printed: 10/16/2007 5:00:13 PM

Analyst: System  
Sample ID: YL2-011-2

Vial: N/A

Injection Volume: 0

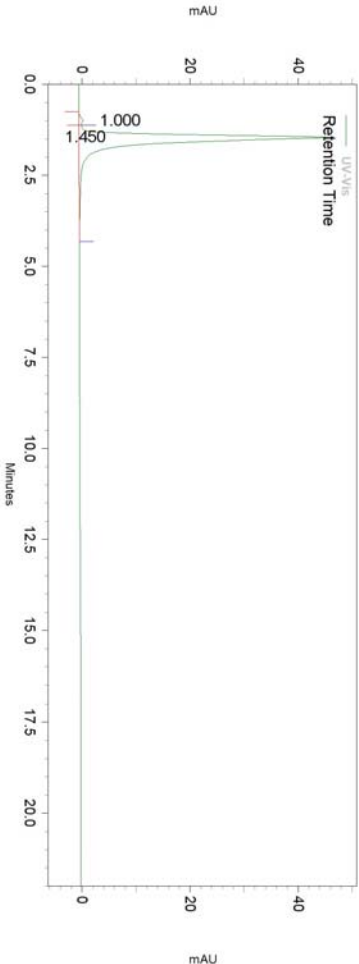

UV-Vis Results

| Name | Retention Time | Area   | Area Percent | Integration Codes |
|------|----------------|--------|--------------|-------------------|
|      | 1.000          | 7985   | 1.189        | BV                |
|      | 1.450          | 663469 | 98.811       | VB                |

|        |  |        |         |  |
|--------|--|--------|---------|--|
| Totals |  | 671454 | 100.000 |  |
|--------|--|--------|---------|--|

Instrument Name: HPLC  
Acquisition Method: C:\EZStart\Projects\Default\Method\McOH90CH3CN10fr1.0-21min.met  
Sequence: C:\HPLC\data\Dan\abc.seq  
Software Version: Version 3.1.7

## HRMS 10m

## Empirical Formula Confirmation Report

Page 1 of 1

Sample Name: YL2-011-2 Sample Location: P1-A-04 Sample Id: YL2-011-2 Operator: EasyAccess  
Data File Name: D:\PE Sciex Data\Projects\chemist\10-07\Data\051007-NEG-01532.wiff Acq Time: October 05 2007, 09:51:19 AM  
Method: D:\TOF\_Data\damethods\EASY ACCESS2.AN\mefc.xml

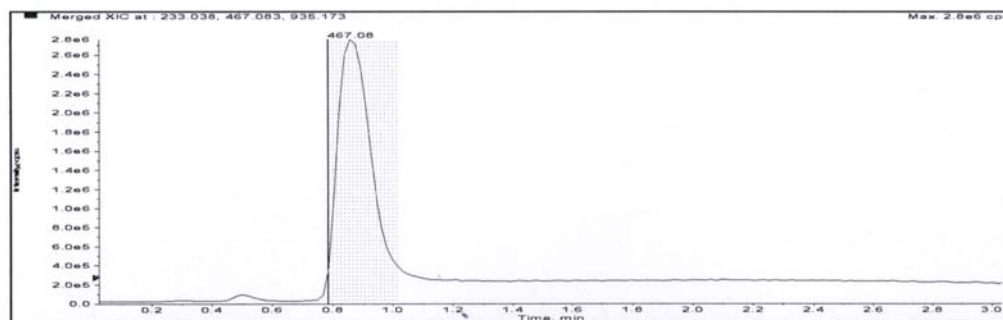

Merged XIC, Period#: 1 Experiment#: 1

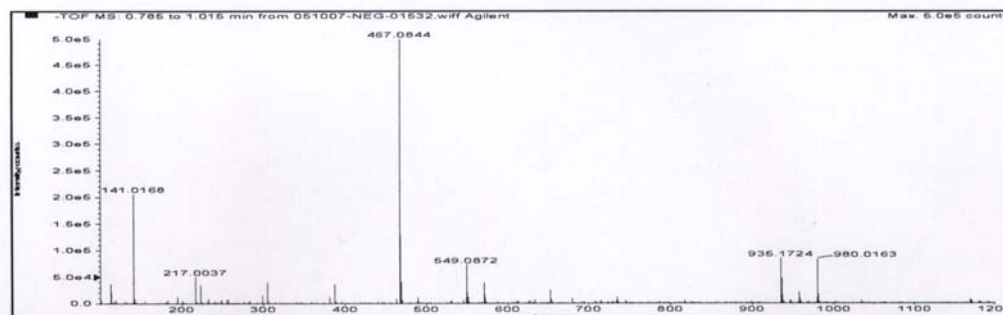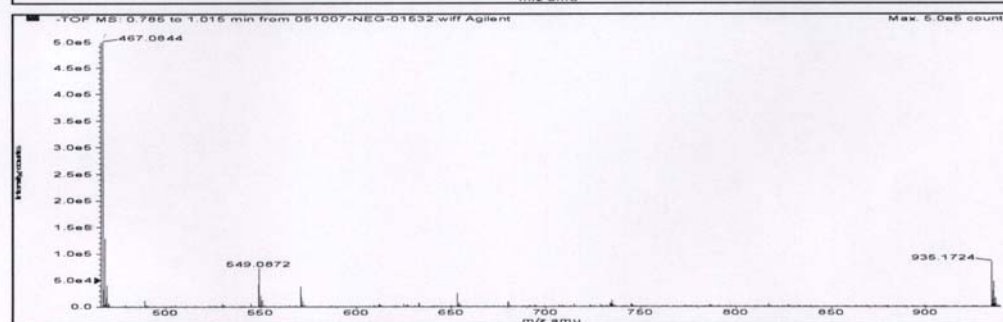

| Formula      | Compound name | Mass      | Peak RT (min) | Peak area  | Description |
|--------------|---------------|-----------|---------------|------------|-------------|
| C22H17FN4O5S | --            | 468.09037 | 0.86          | 2.27549 E7 | --          |

| Species | Abundance (counts) | Ion Mass  | Measured Mass | Error (mDa) | Error (ppm) | Ret. Time Error (min) |
|---------|--------------------|-----------|---------------|-------------|-------------|-----------------------|
| [M-H]-  | 518389.03          | 467.08309 | 467.08437     | 1.27969     | 2.74        | --                    |
| [2M-H]- | 86810.82           | 935.17346 | 935.17241     | -1.04910    | -1.12       | --                    |

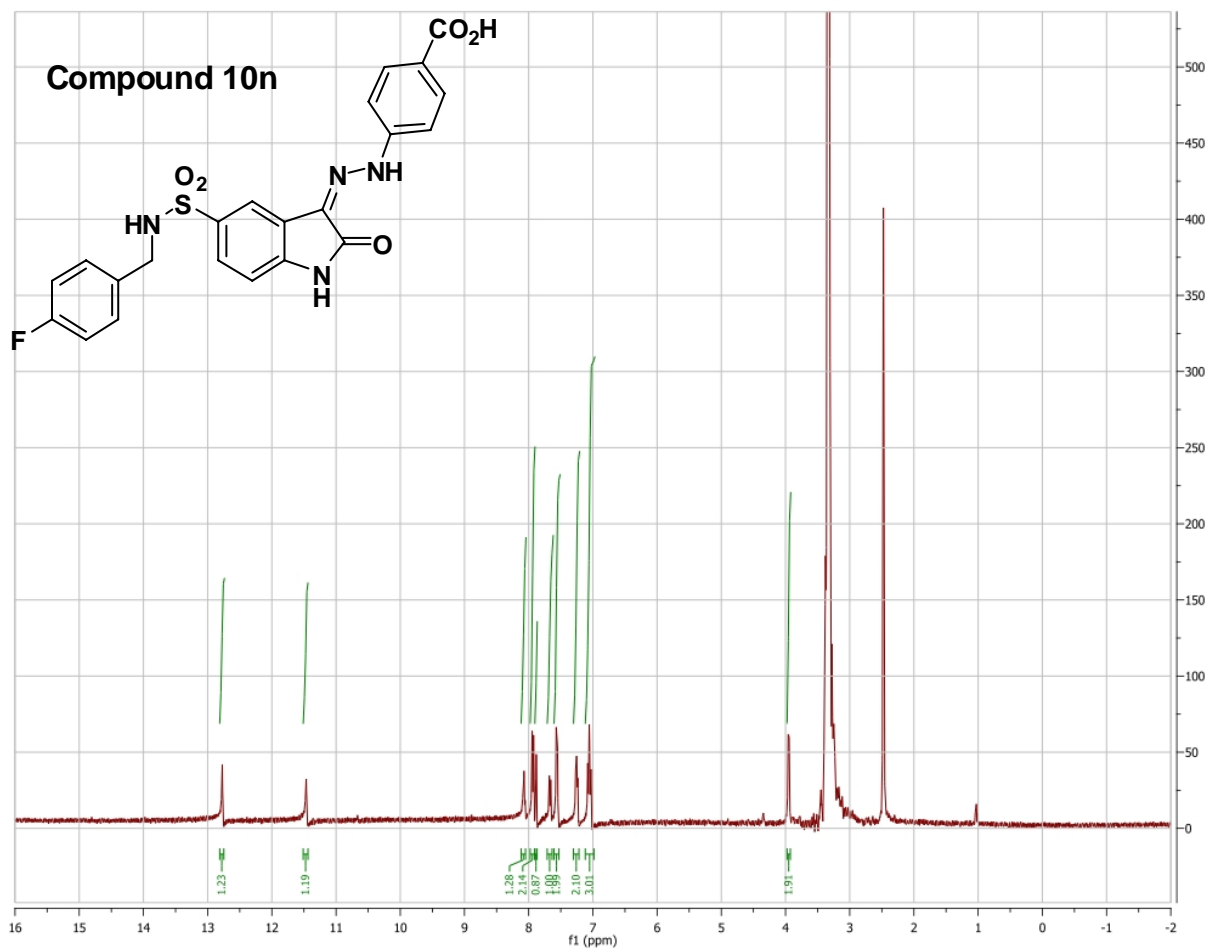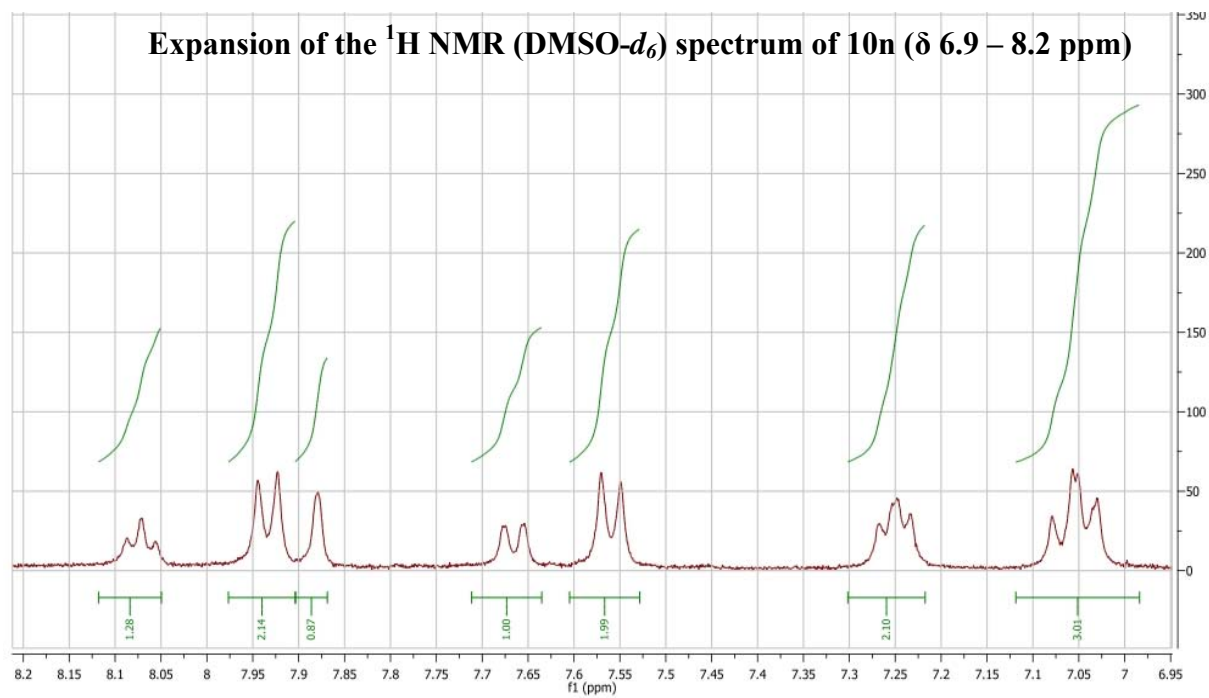

HPLC 10n

Area Percent Report

data\Yunting\YL2-011-1\System10-16-2007 3-46-52 PM.dat  
Acquired: 10/16/2007 3:47:39 PM

Page 1 of 2 Data File: C:\HPLC

Printed: 10/16/2007 4:11:55 PM

Analyst: System  
Sample ID: YL2-011-1 Vial: N/A Injection Volume: 0

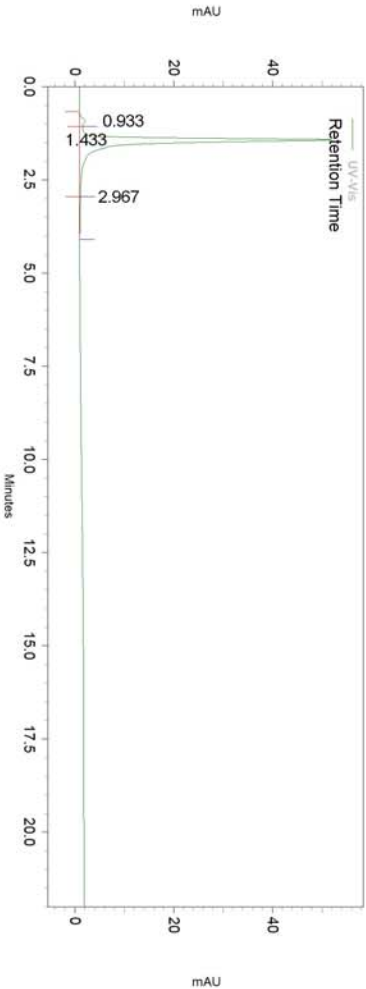

| UV-Vis Results                                                                      |                |        |              |                   |
|-------------------------------------------------------------------------------------|----------------|--------|--------------|-------------------|
| Name                                                                                | Retention Time | Area   | Area Percent | Integration Codes |
|                                                                                     | 0.933          | 13006  | 2.608        | BV                |
|                                                                                     | 1.433          | 481586 | 96.566       | VV                |
|                                                                                     | 2.967          | 4122   | 0.827        | VB                |
| Totals                                                                              |                |        |              |                   |
| Instrument Name: HPLC Software Version: Version 3.1.7                               |                |        |              |                   |
| Acquisition Method: C:\EZStart\Projects\Default\Method\MeOH90CH3CN10fr1.0-21min.met |                |        |              |                   |
| Sequence: C:\HPLC\data\Dan\abc.seq                                                  |                |        |              |                   |



## HRMS 10n

## Empirical Formula Confirmation Report

Page 1 of 1

Sample Name: YL2-011-1 Sample Location: P1-A-03 Sample Id: YL2-011-1 Operator: EasyAccess  
Data File Name: D:\PE Sciex Data\Projects\chemist10-07\Data\051007-NEG-01531.wiff Acq Time: October 05 2007, 09:47:19 AM  
Method: D:\TOF\_Data\damethods\EASY ACCESS2.ANM\efc.xml

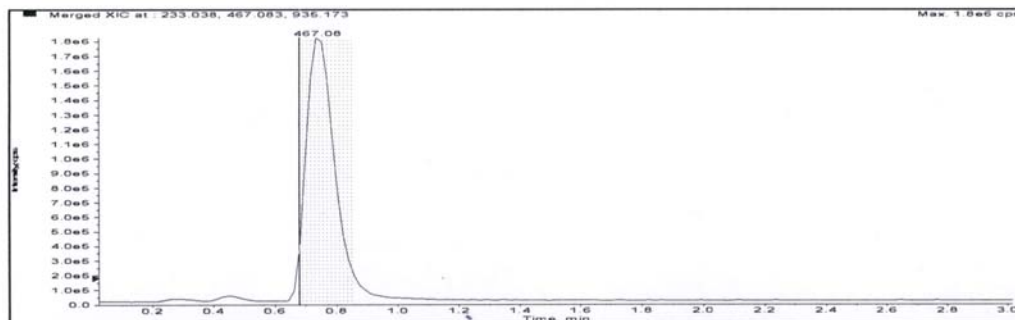

Merged XIC, Period# : 1 Experiment# : 1

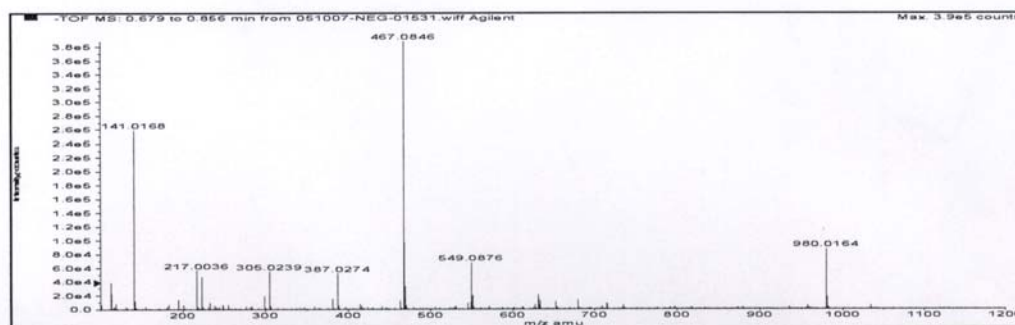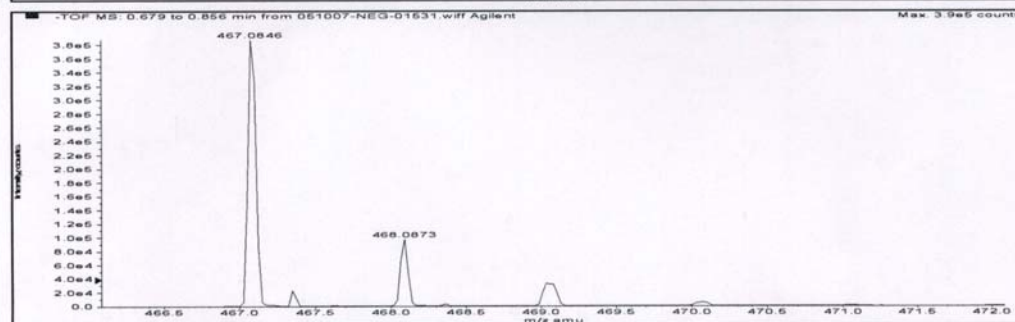

| Formula      | Compound name | Mass      | Peak RT (min) | Peak area  | Description |
|--------------|---------------|-----------|---------------|------------|-------------|
| C22H17FN4O5S | --            | 468.09037 | 0.74          | 1.16284 E7 | --          |

| Species | Abundance (counts) | Ion Mass  | Measured Mass | Error (mDa) | Error (ppm) | Ret. Time Error (min) |
|---------|--------------------|-----------|---------------|-------------|-------------|-----------------------|
| [M-H]-  | 401403.69          | 467.08309 | 467.08458     | 1.49158     | 3.19        | --                    |

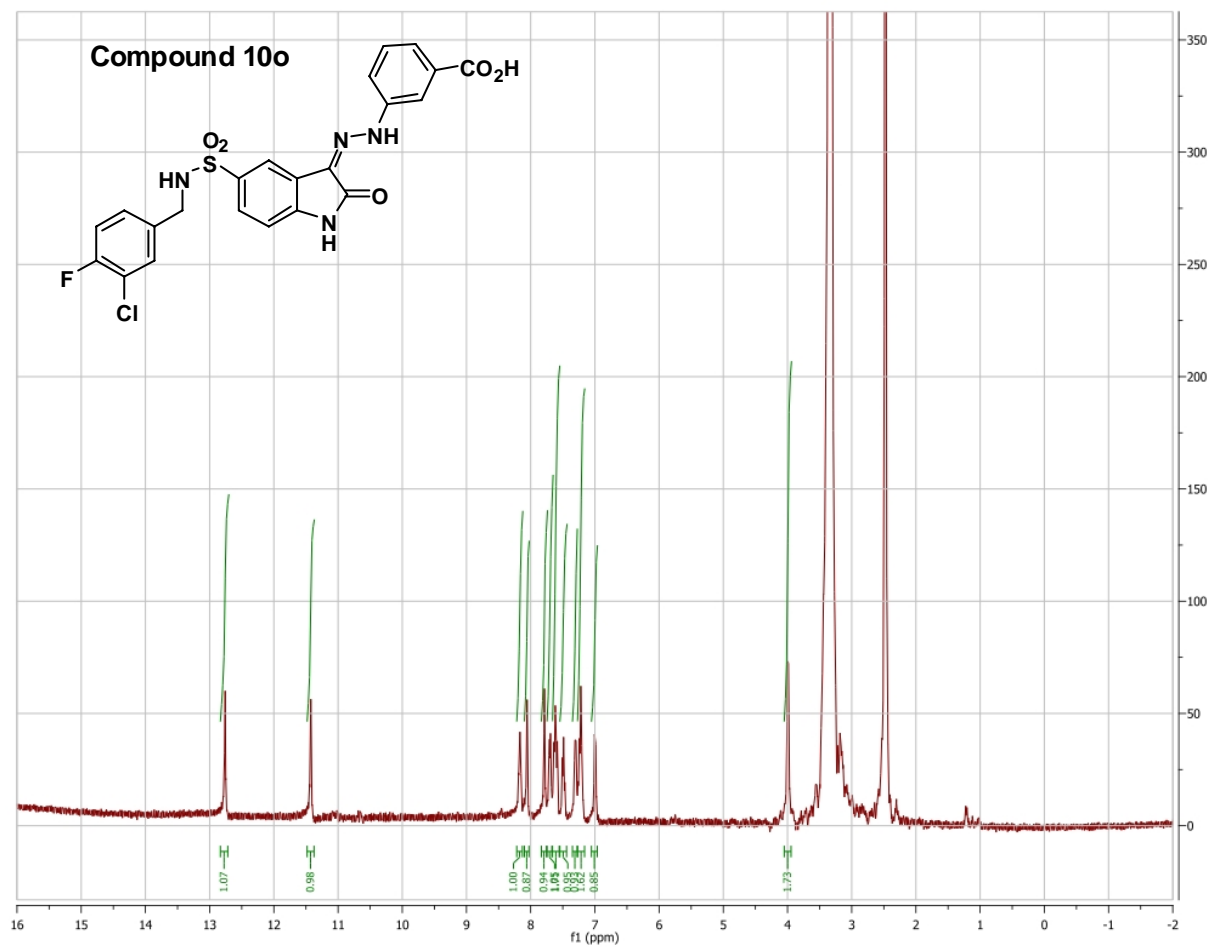

Expansion of the  $^1\text{H}$  NMR (DMSO- $d_6$ ) spectrum of 10o ( $\delta$  6.9 – 8.3 ppm)

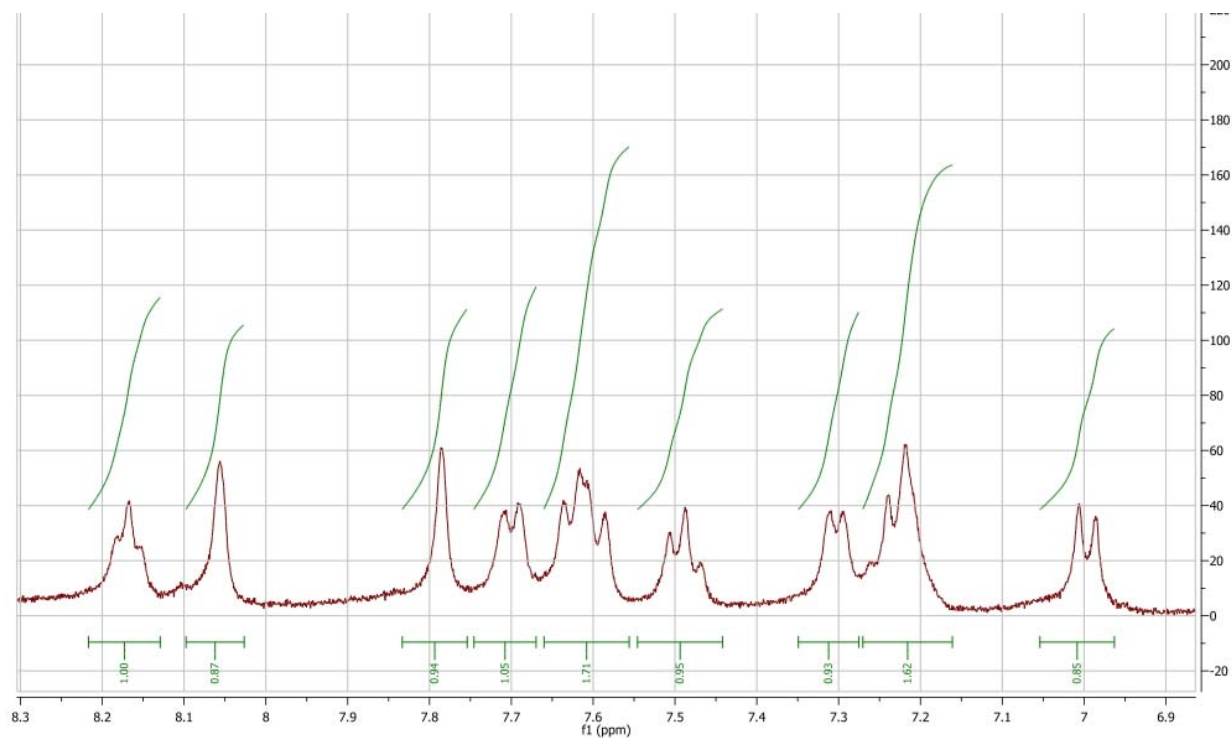

## HRMS 100

## Empirical Formula Confirmation Report

Page 1 of 1

Sample Name: YL2-005-2 Sample Location: P1-A-06 Sample Id: YL2-005-2 Operator: EasyAccess  
Data File Name: D:\PE Sciex Data\Projects\chemist\09-07\Data\130907-NEG-01317.wiff Acq Time: September 13 2007, 03:52:28 PM  
Method: D:\TOF\_Data\damethods\EASY ACCESS2.ANM\efc.xml

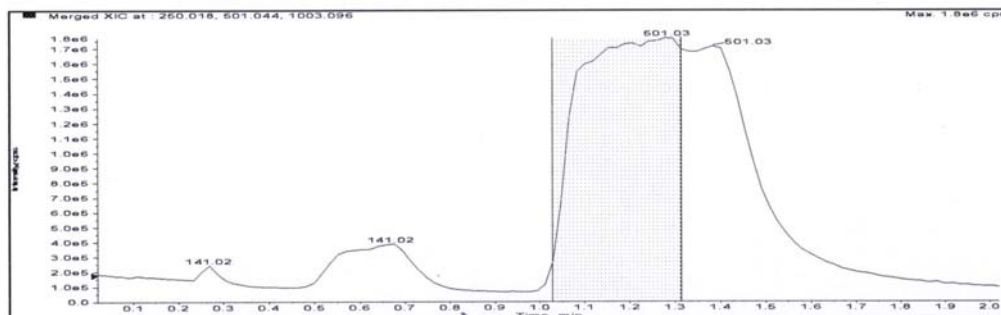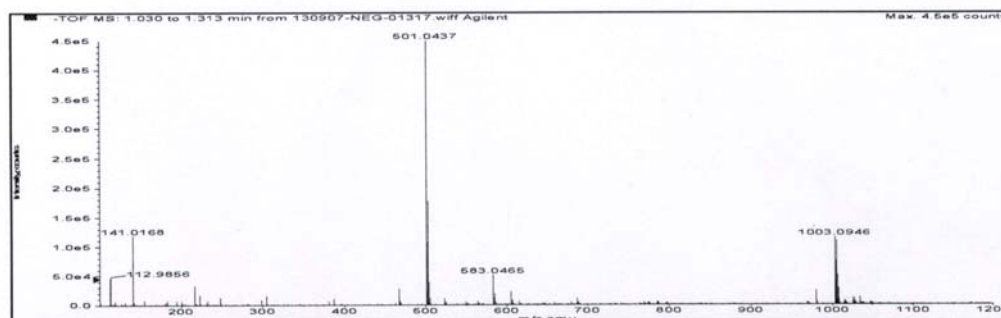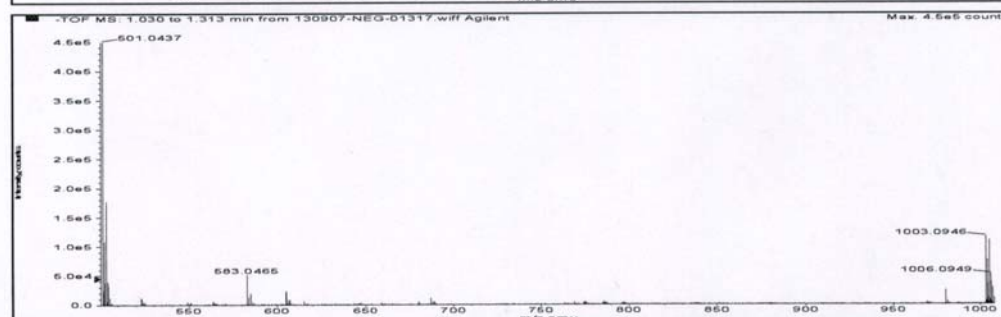

| Formula        | Compound name | Mass      | Peak RT (min) | Peak area  | Description |
|----------------|---------------|-----------|---------------|------------|-------------|
| C22H16ClFN4O5S | --            | 502.05140 | 1.28          | 2.66757 E7 | --          |

| Species | Abundance (counts) | Ion Mass   | Measured Mass | Error (mDa) | Error (ppm) | Ret. Time Error (min) |
|---------|--------------------|------------|---------------|-------------|-------------|-----------------------|
| [M-H]-  | 484092.05          | 501.04412  | 501.04369     | -0.42702    | -0.85       | --                    |
| [2M-H]- | 123767.98          | 1003.09552 | 1003.09459    | -0.92370    | -0.92       | --                    |

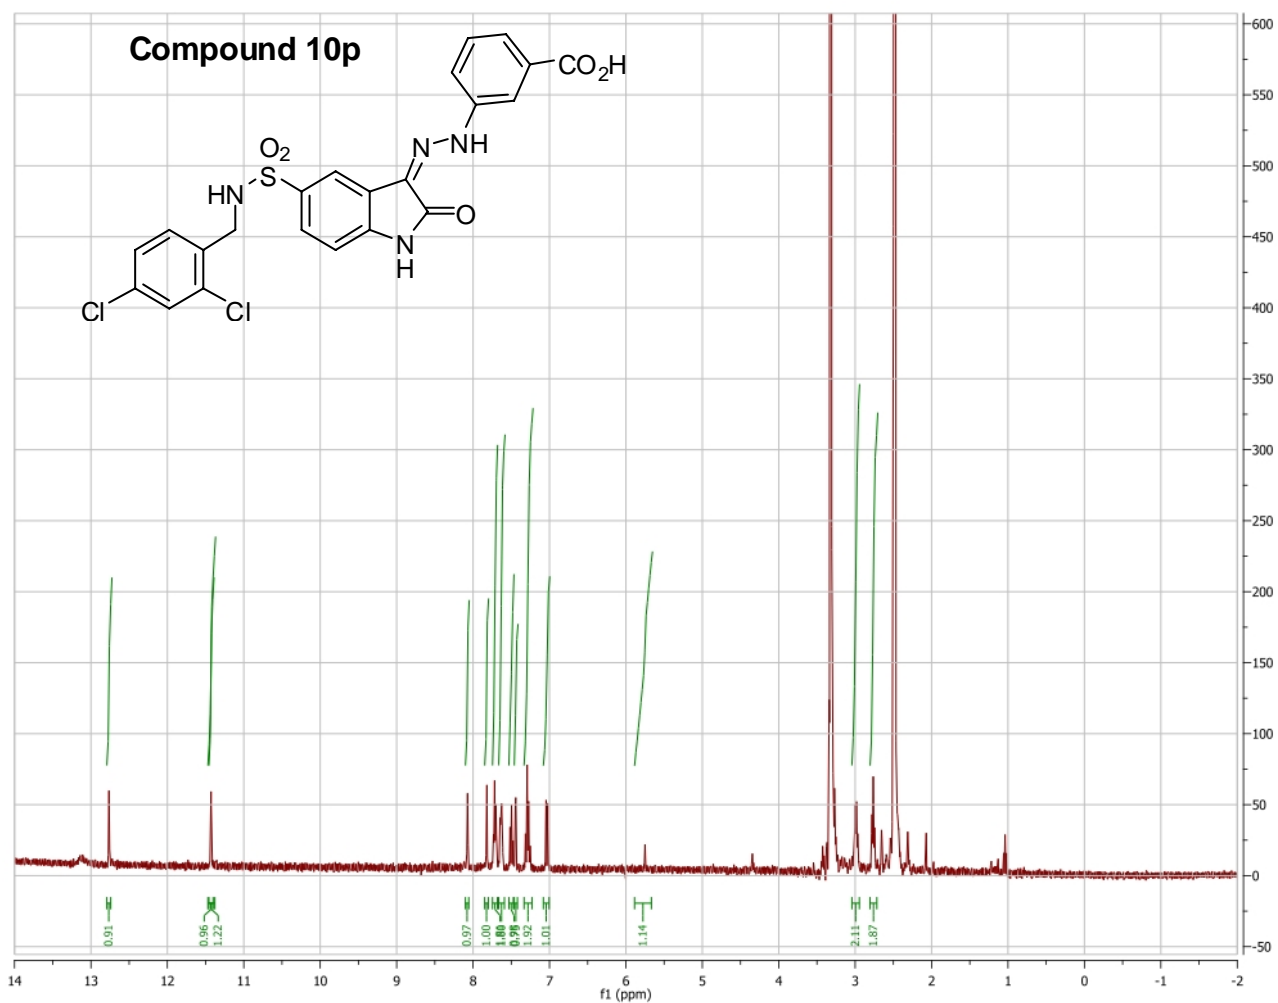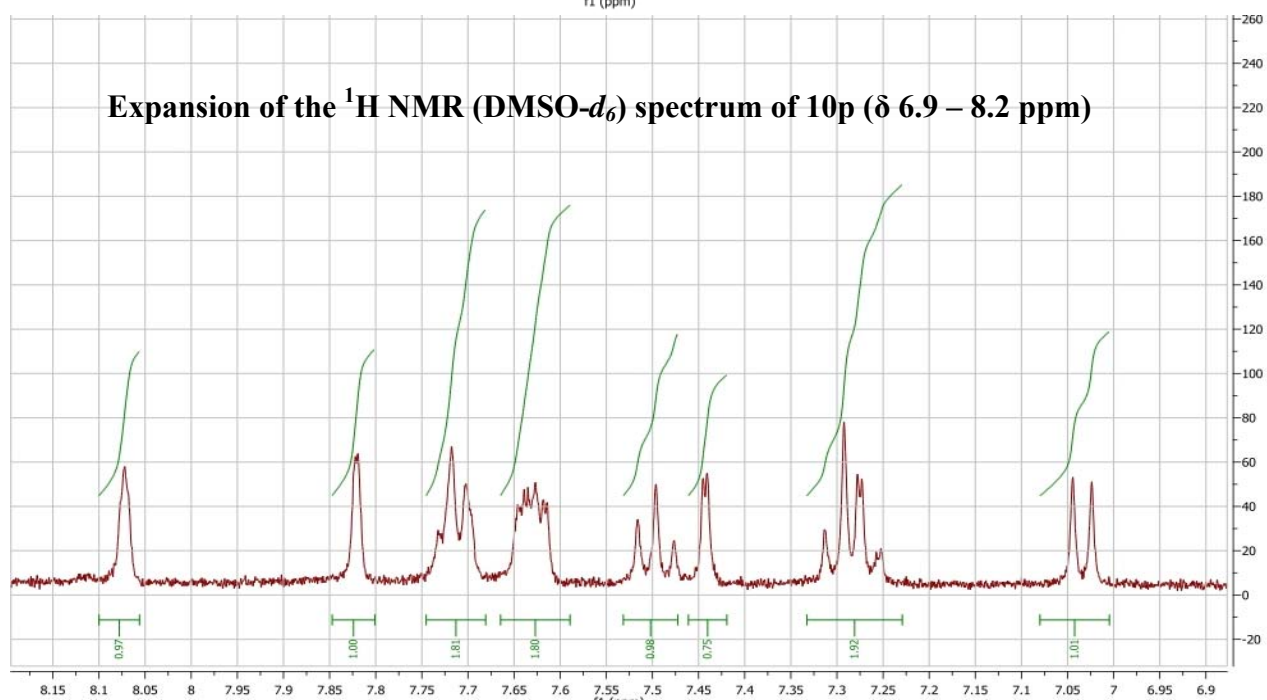

## HRMS 10p

Empirical Formula Confirmation Report

Page 1 of 1

Sample Name: YL1-164 Sample Location: P1-E-01 Sample ID: YL1-164 Operator: EasyAccess  
Data File Name: D:\PE Sciex Data\Projects\chemist\03-08\Data\040308-NEG-00459.wiff Acq Time: March 04 2008, 02:45:46 PM  
Method: D:\TOF\_Data\damethods\EASY ACCESS2.ANM\efc.xml

One or more scans have failed IRM. Review the data file for details.

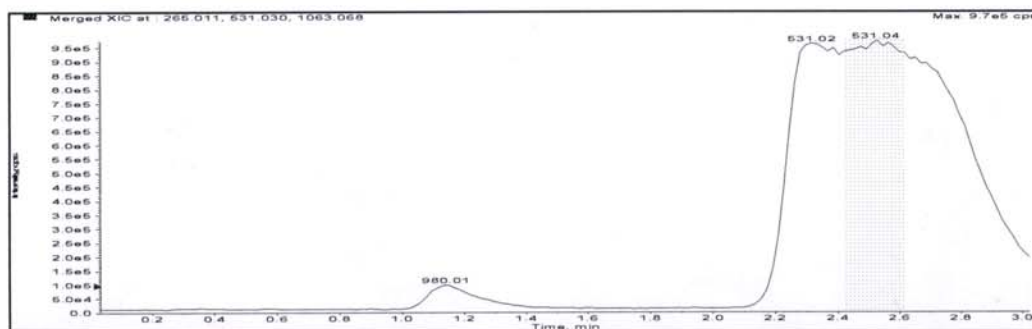

Merged XIC, Period# : 1 Experiment# : 1

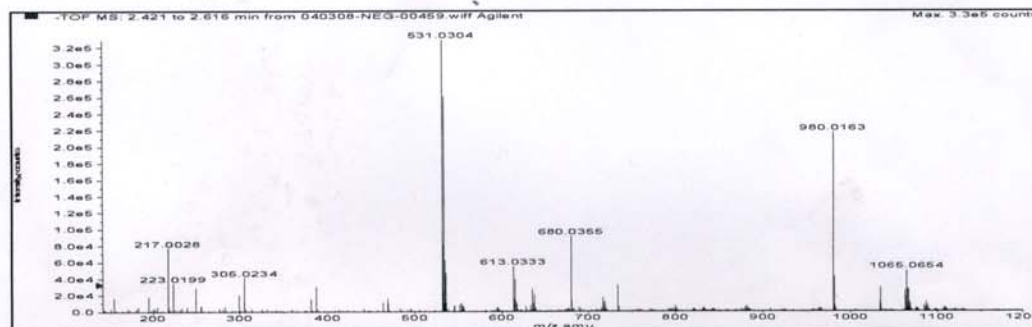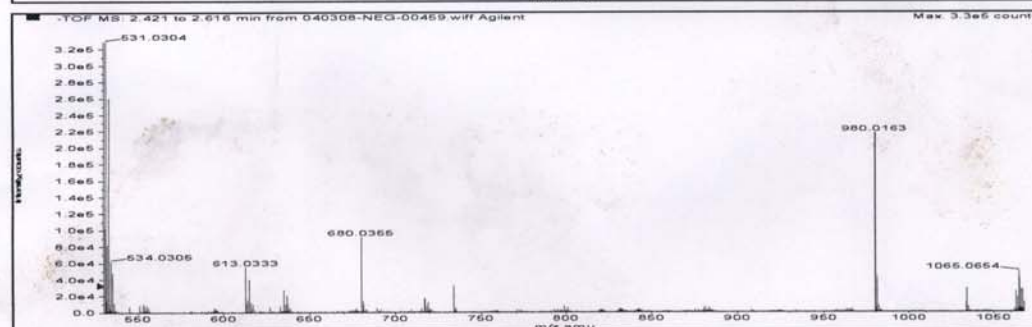

| Formula        | Compound name | Mass      | Peak RT (min) | Peak area  | Description |
|----------------|---------------|-----------|---------------|------------|-------------|
| C23H18Cl2N4O5S | --            | 532.03750 | 2.52          | 3.38104 E6 | --          |

| Species | Abundance (counts) | Ion Mass   | Measured Mass | Error (mDa) | Error (ppm) | Ret. Time Error (min) |
|---------|--------------------|------------|---------------|-------------|-------------|-----------------------|
| [M-H]-  | 354811.37          | 531.03022  | 531.03038     | 0.15894     | 0.30        | --                    |
| [2M-H]- | 26601.81           | 1063.06772 | 1063.06609    | -1.62414    | -1.53       | --                    |

Tuesday, March 04, 2008

14:49:00 PM

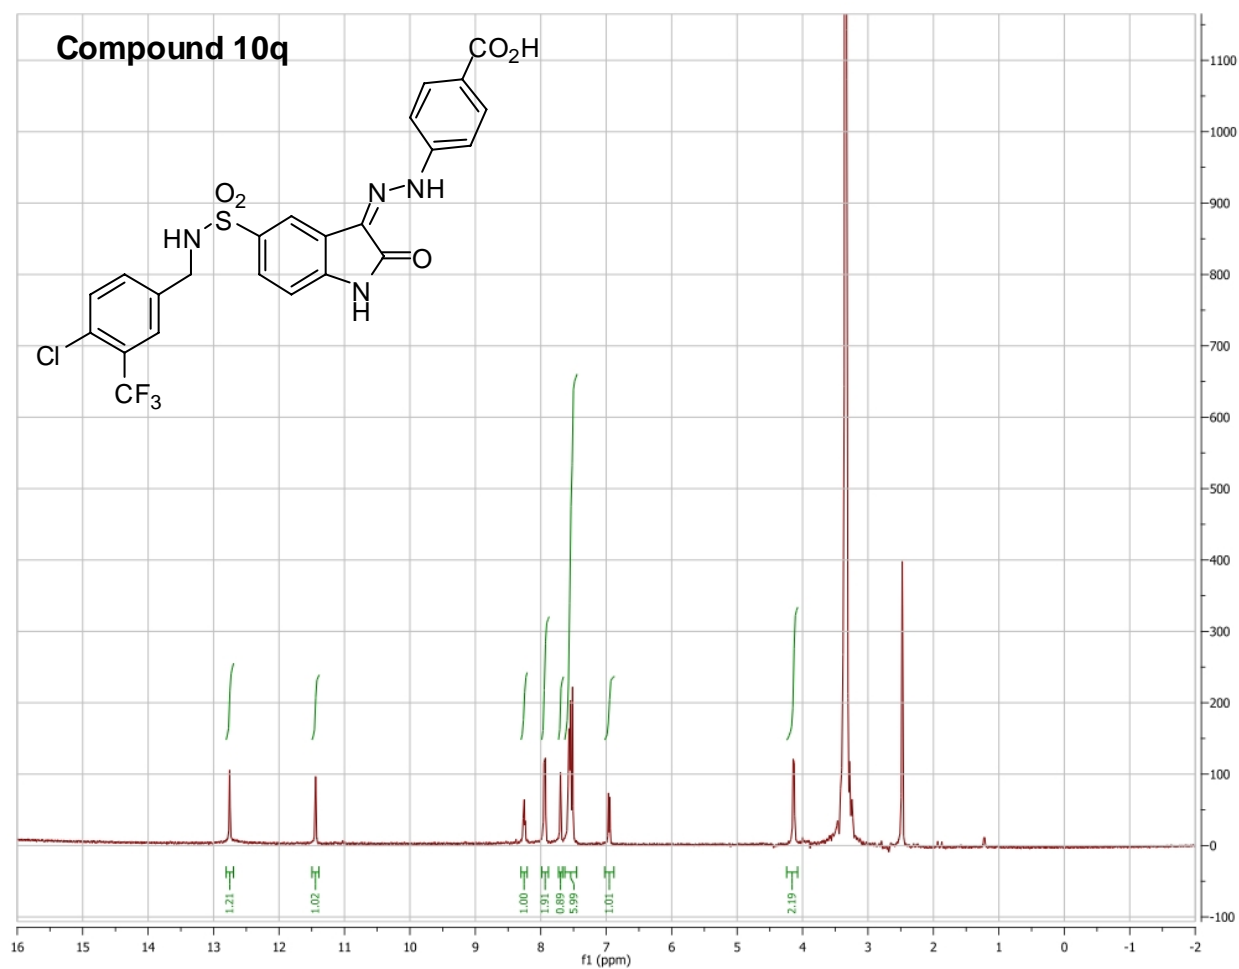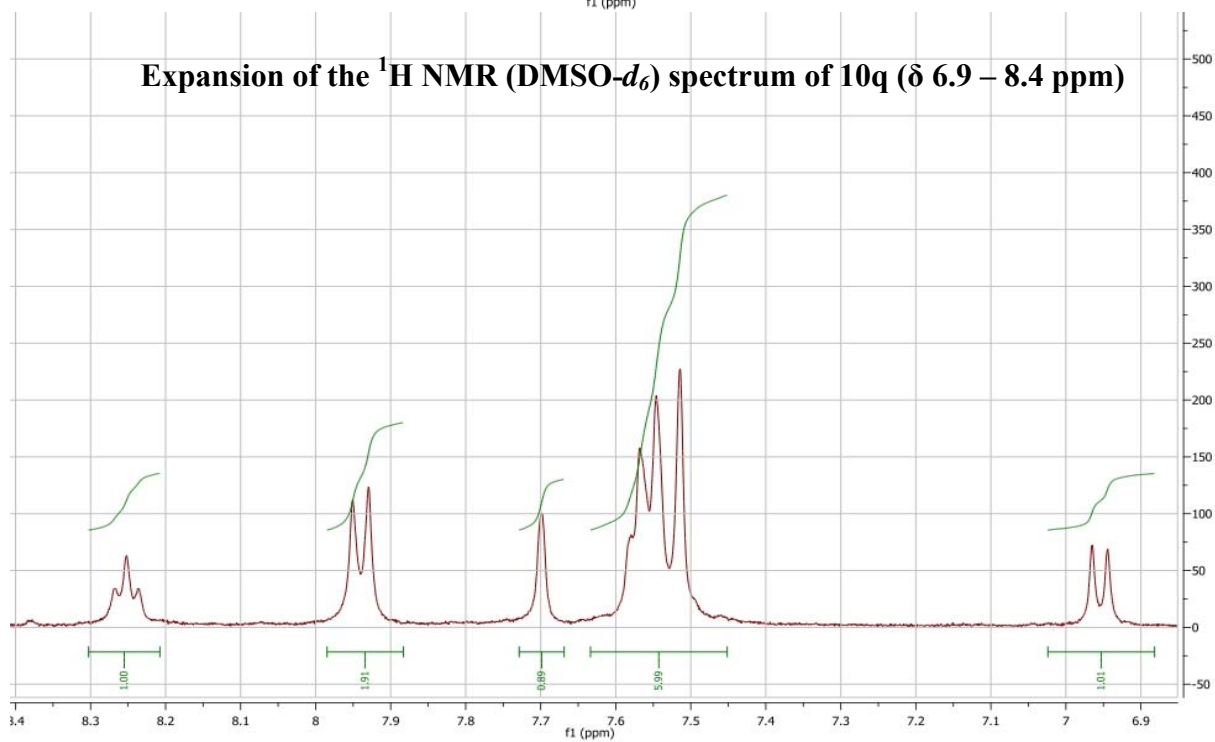



## HRMS 10q

Empirical Formula Confirmation Report

Page 1 of 1

Sample Name: YL2-008-1 Sample Location: P1-A-08 Sample Id: YL2-008-1 Operator: EasyAccess  
Data File Name: D:\PE Sciex Data\Projects\chemist\09-07\Data\130907-NEG-01319.wiff Acq Time: September 13 2007, 03:58:32 PM  
Method: D:\TOF\_Data\damethods\EASY ACCESS2.ANM\efc.xml

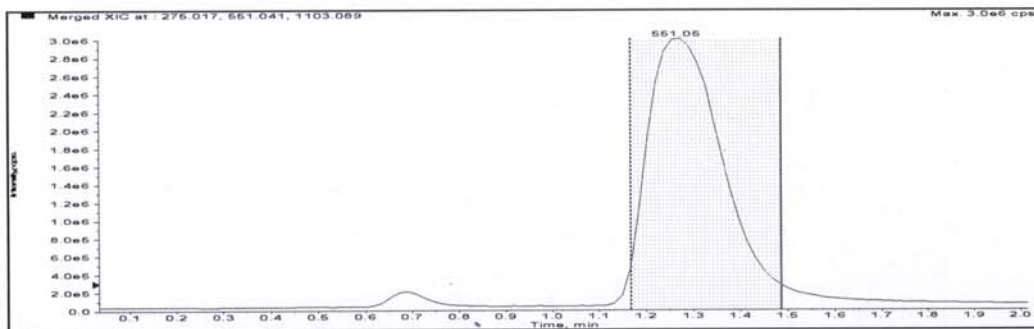

Merged XIC, Period#: 1 Experiment#: 1

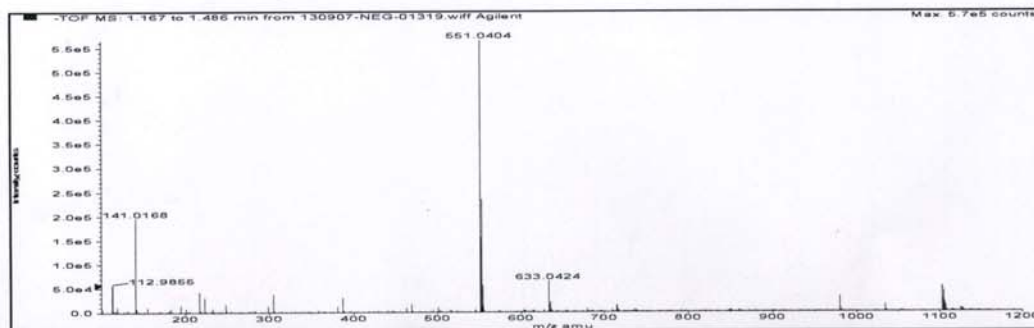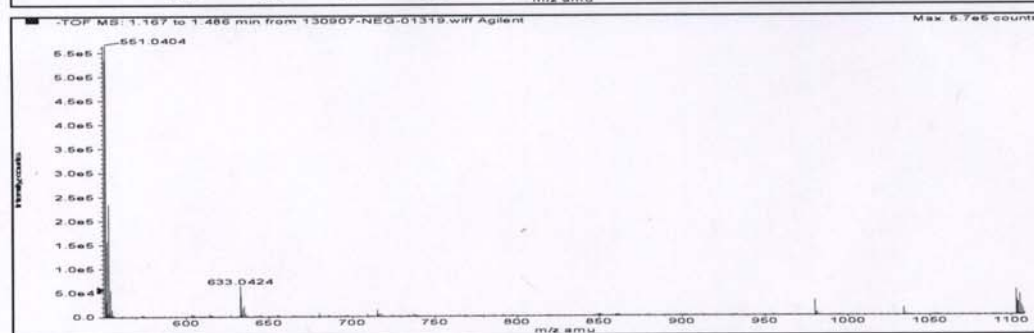

| Formula         | Compound name | Mass      | Peak RT (min) | Peak area  | Description |
|-----------------|---------------|-----------|---------------|------------|-------------|
| C23H16ClF3N4O5S | --            | 552.04820 | 1.27          | 3.23246 E7 | --          |

| Species | Abundance (counts) | Ion Mass   | Measured Mass | Error (mDa) | Error (ppm) | Ret. Time Error (min) |
|---------|--------------------|------------|---------------|-------------|-------------|-----------------------|
| [M-H]-  | 598517.13          | 551.04093  | 551.04040     | -0.52870    | -0.96       | --                    |
| [2M-H]- | 53284.80           | 1103.08913 | 1103.08760    | -1.52897    | -1.39       | --                    |



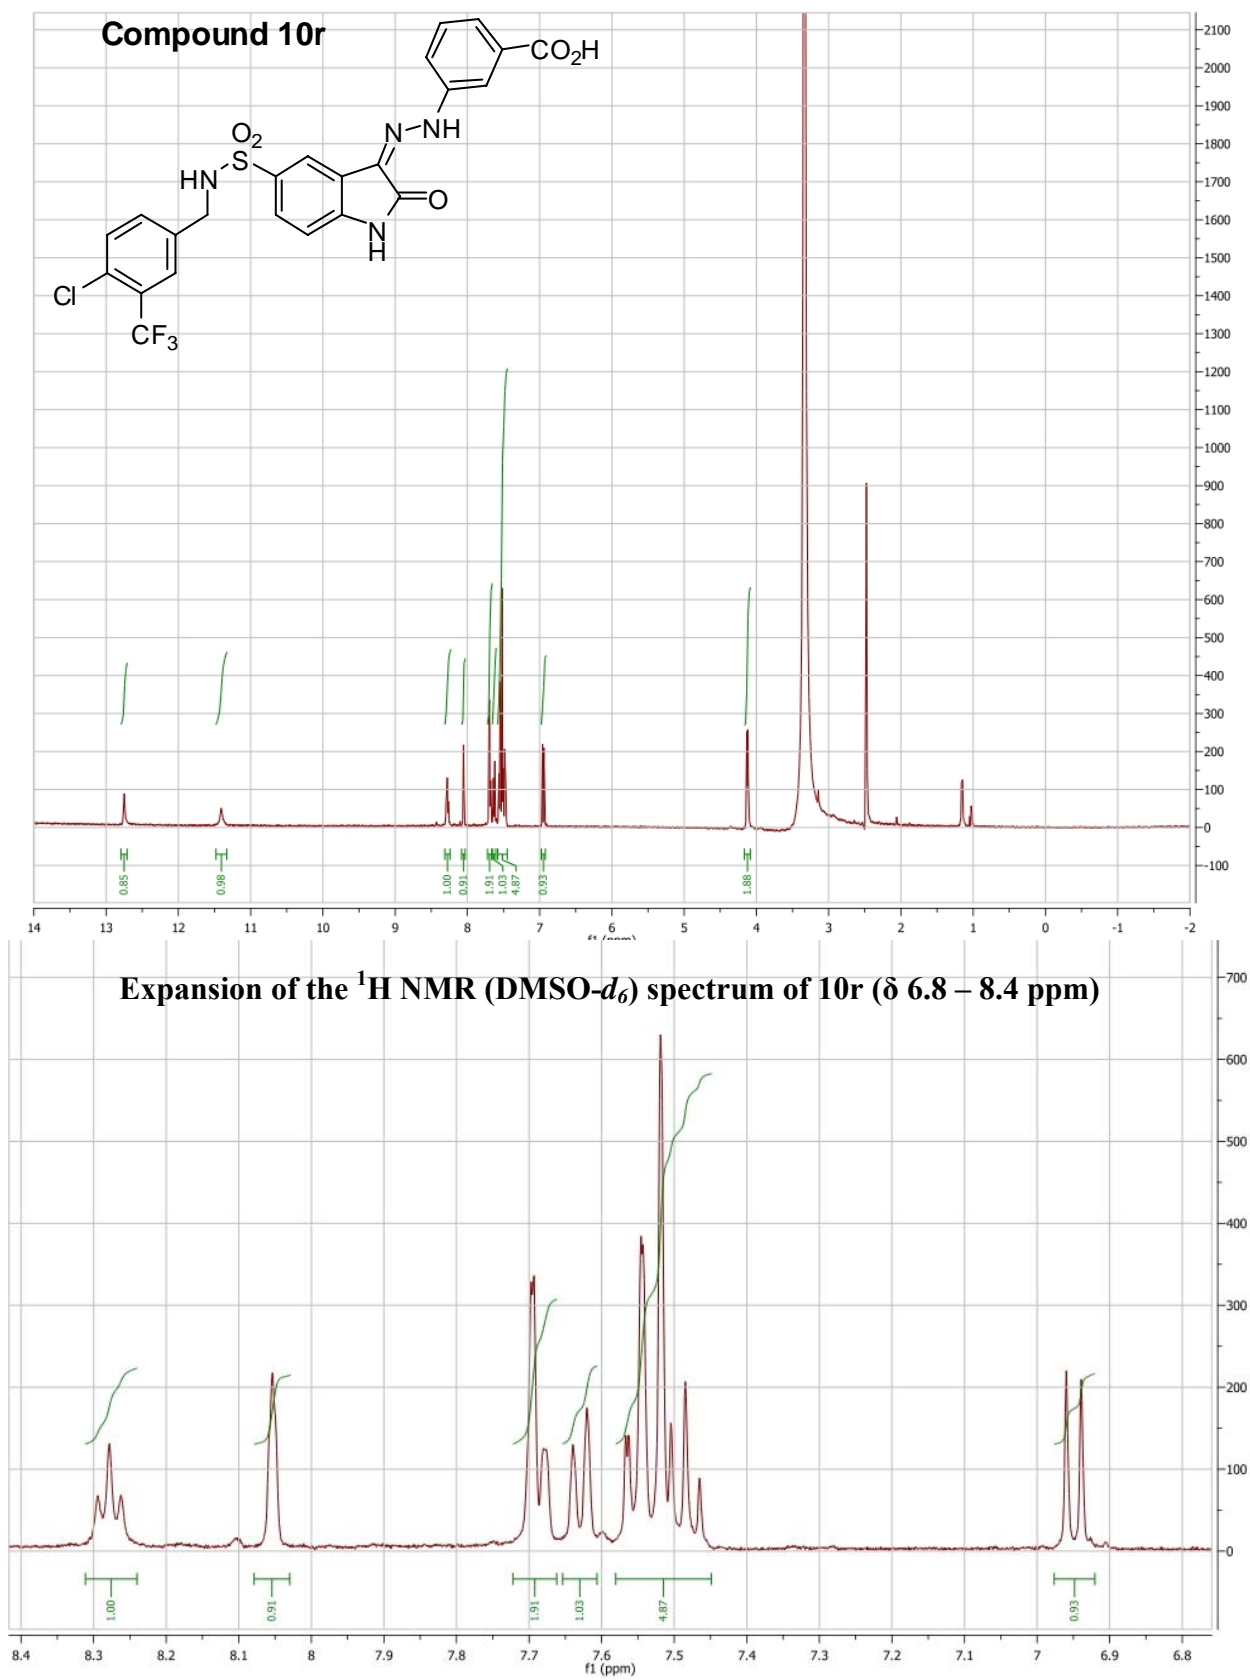

## HRMS 10r

## Empirical Formula Confirmation Report

Page 1 of 1

Sample Name: YL2-008-2 Sample Location: P1-A-01 Sample Id: YL2-008-2 Operator: EasyAccess  
Data File Name: D:\PE Sciex Data\Projects\chemist\10-07\Data\051007-NEG-01529.wiff Acq Time: October 05 2007, 09:39:20 AM  
Method: D:\TOF\_Data\damethods\EASY ACCESS2.ANM\efc.xml

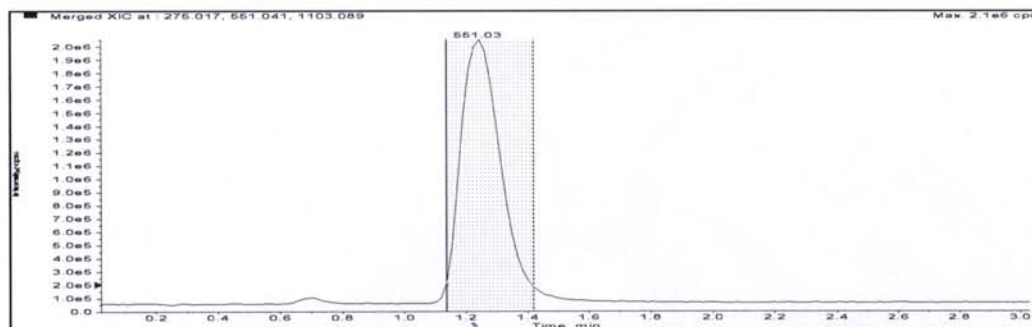

Merged XIC, Period# : 1 Experiment# : 1

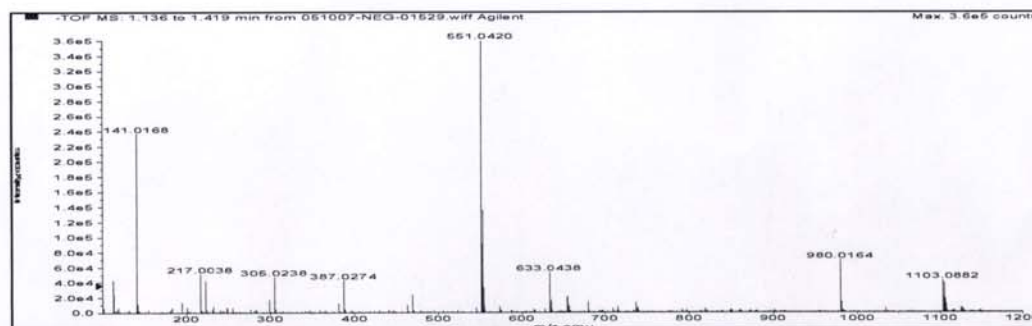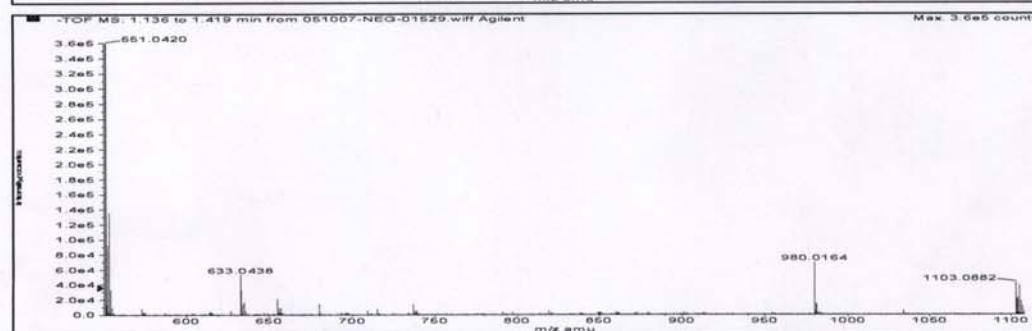

| Formula         | Compound name | Mass      | Peak RT (min) | Peak area  | Description |
|-----------------|---------------|-----------|---------------|------------|-------------|
| C23H16ClF3N4O5S | --            | 552.04820 | 1.24          | 1.79072 E7 | --          |

| Species | Abundance (counts) | Ion Mass   | Measured Mass | Error (mDa) | Error (ppm) | Ret. Time Error (min) |
|---------|--------------------|------------|---------------|-------------|-------------|-----------------------|
| [M-H]-  | 379744.59          | 551.04093  | 551.04199     | 1.05953     | 1.92        | --                    |
| [2M-H]- | 42931.11           | 1103.08913 | 1103.08822    | -0.90894    | -0.82       | --                    |

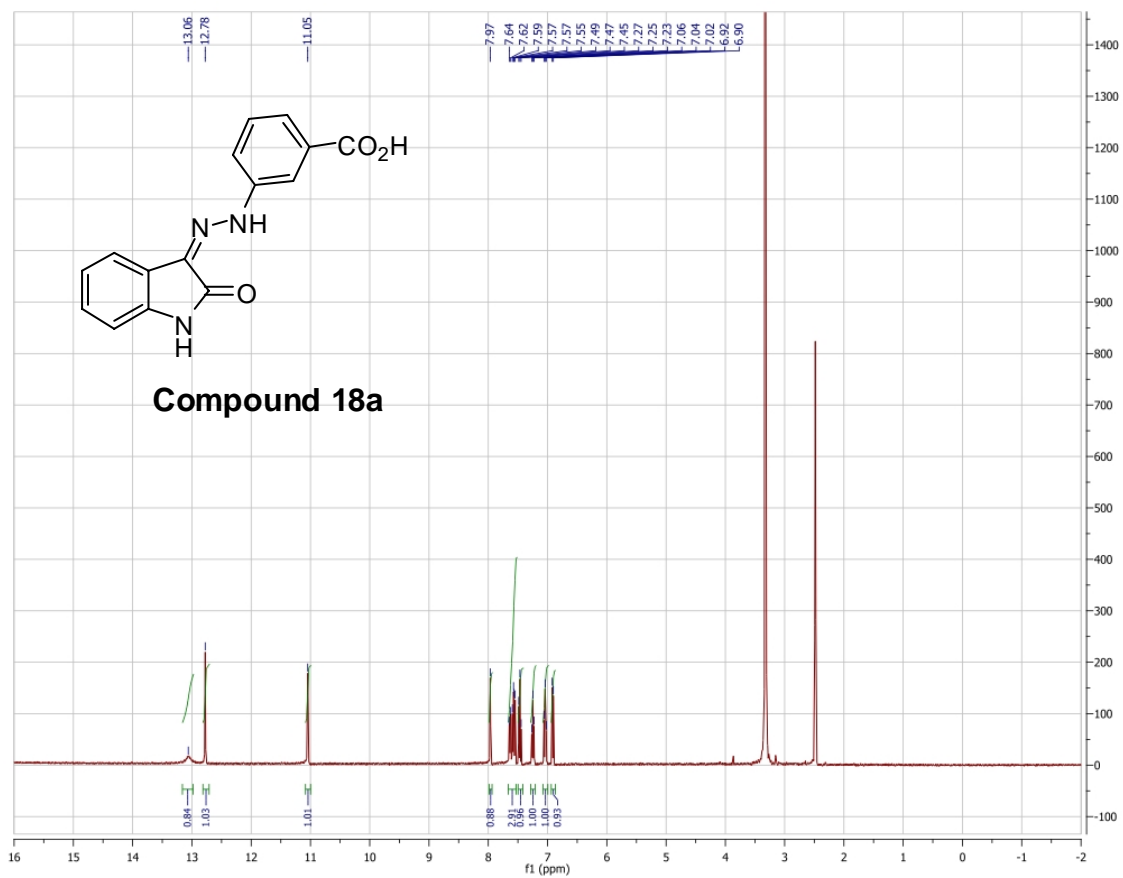

Expansion of the  $^1\text{H}$  NMR (DMSO- $d_6$ ) spectrum of 18a ( $\delta$  6.85 – 8.05 ppm)

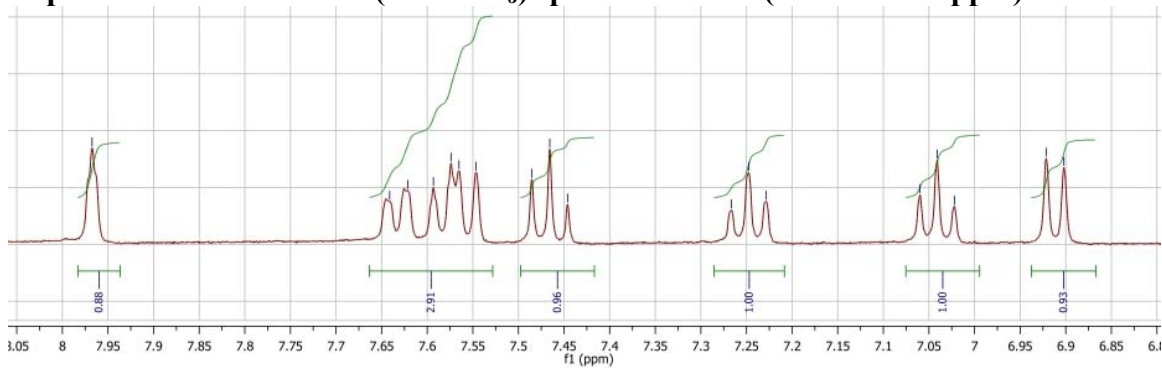

## HRMS 18a

## Empirical Formula Confirmation Report

Page 1 of 1

Compound 15a

Sample Name: RPM720-15a Sample Location: P1-F-01 Sample Id: RPM720-15a Operator: EasyAccess  
Data File Name: D:\PE Sciex Data\Projects\chemist\03-08\Data\040308-NEG-00468.wiff Acq Time: March 04 2008, 03:16:32 PM  
Method: D:\TOF\_Data\damethods\EASY ACCESS2.ANM\efc.xml

One or more scans have failed IRM. Review the data file for details.

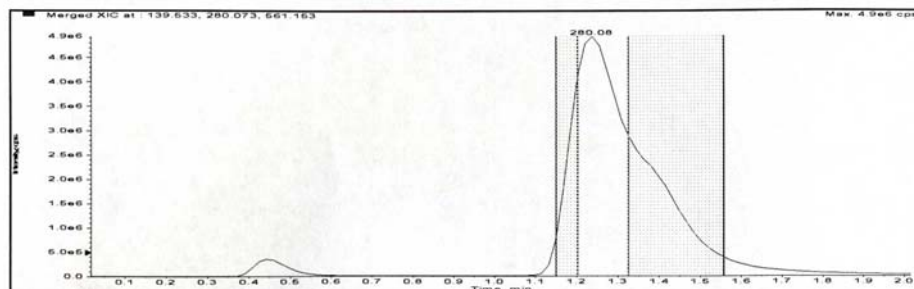

Merged XIC, Period# : 1 Experiment# : 1

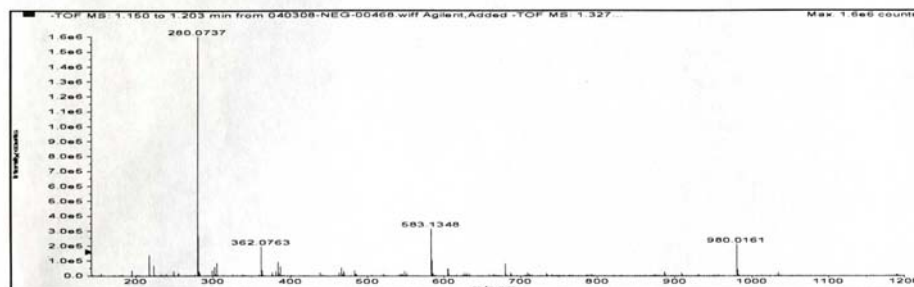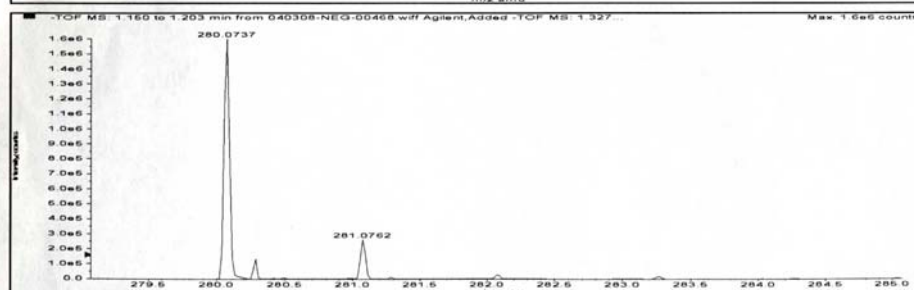

| Formula    | Compound name | Mass      | Peak RT (min) | Peak area  | Description |
|------------|---------------|-----------|---------------|------------|-------------|
| C15H11N3O3 | --            | 281.08004 | 1.24          | 5.99959 E7 | --          |

| Species | Abundance (counts) | Ion Mass  | Measured Mass | Error (mDa) | Error (ppm) | Ret. Time Error (min) |
|---------|--------------------|-----------|---------------|-------------|-------------|-----------------------|
| [M-H]-  | 1612220.70         | 280.07276 | 280.07366     | 0.89710     | 3.20        | --                    |

Tuesday, March 04, 2008

15:18:46 PM

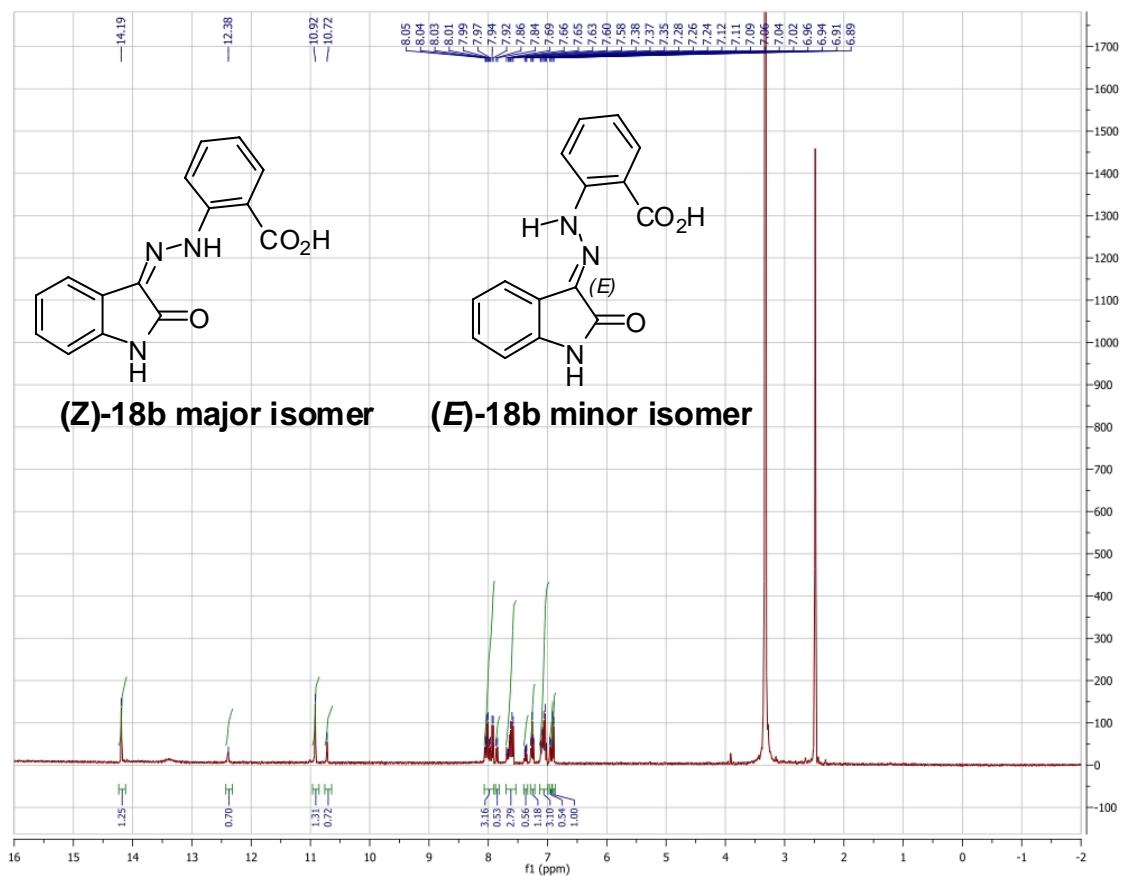

Expansion of the  $^1\text{H}$  NMR ( $\text{DMSO-}d_6$ ) spectrum of (*E*) and (*Z*)-18b ( $\delta$  6.80 – 8.2 ppm)

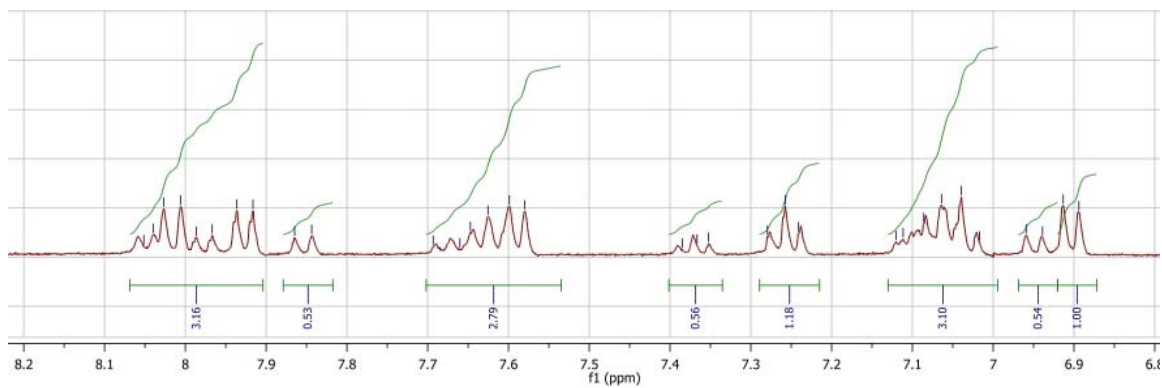

## HRMS (E) and (Z)-18b

Empirical Formula Confirmation Report

Compound 15b

Page 1 of 1

Sample Name: RPM718-15b Sample Location: P1-F-03 Sample Id: RPM718-15b Operator: EasyAccess  
Data File Name: D:\PE\_Sciex\Data\Projects\chemist\03-08\Data\040308-NEG-00470.wiff Acq Time: March 04 2008, 03:22:29 PM  
Method: D:\TOF\_Data\amethods\EASY ACCESS2.ANM\efc.xml

One or more scans have failed IRM. Review the data file for details.

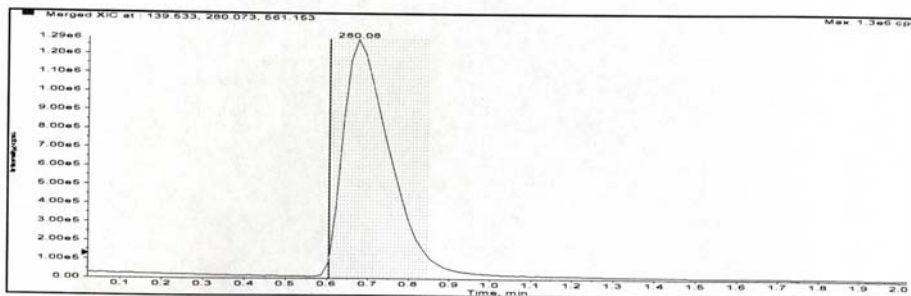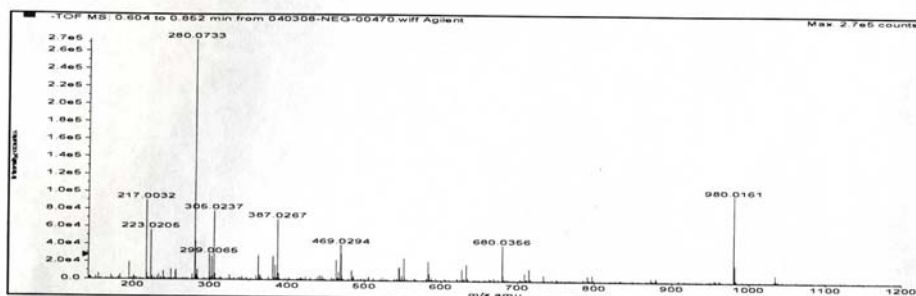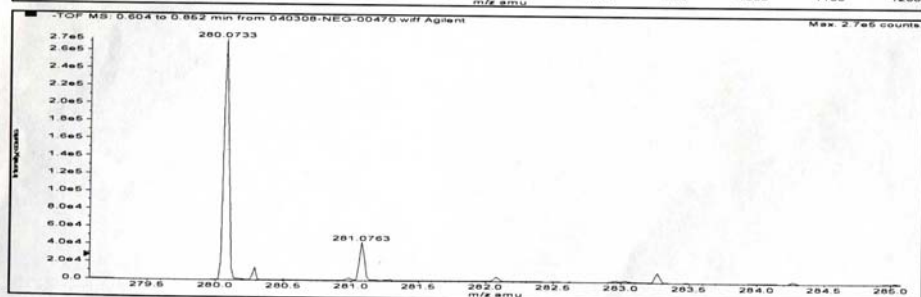

| Formula    | Compound name | Mass      | Peak RT (min) | Peak area  | Description |
|------------|---------------|-----------|---------------|------------|-------------|
| C15H11N3O3 | --            | 281.08004 | 0.68          | 9.96981 E6 | --          |

| Species | Abundance (counts) | Ion Mass  | Measured Mass | Error (mDa) | Error (ppm) | Ret. Time Error (min) |
|---------|--------------------|-----------|---------------|-------------|-------------|-----------------------|
| [M-H]-  | 275203.28          | 280.07276 | 280.07329     | 0.52316     | 1.87        | --                    |

Tuesday, March 04, 2008

15:24:40 PM

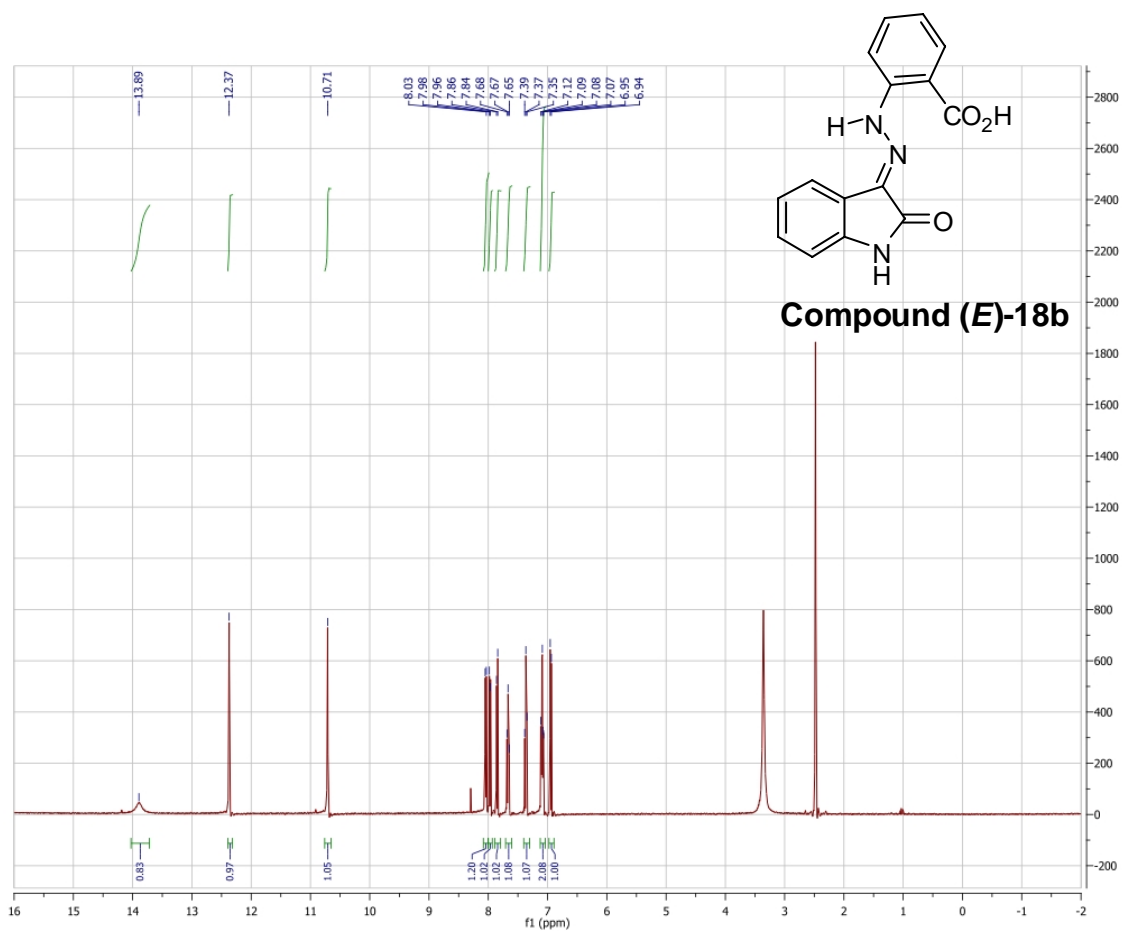

**Expansion of the  $^1\text{H}$  NMR ( $\text{DMSO}-d_6$ ) spectrum of (E)-18b ( $\delta$  6.8 – 8.1 ppm)**

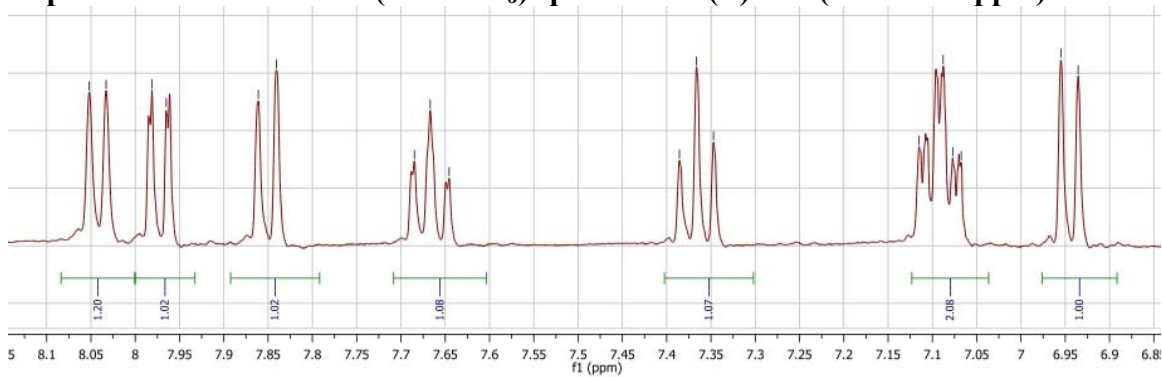



## HRMS (E)-18b

Empirical Formula Confirmation Report

Page 1 of 1

Compound 15c

Sample Name: RPM719-15c Sample Location: P1-F-05 Sample Id: RPM719-15c Operator: EasyAccess  
Data File Name: D:\PE Sciex Data\Projects\chemist\03-08\Data\040308-NEG-00472.wiff Acq Time: March 04 2008, 03:28:24 PM  
Method: D:\TOF\_Data\damethods\EASY ACCESS2.ANM\efc.xml

One or more scans have failed IRM. Review the data file for details.

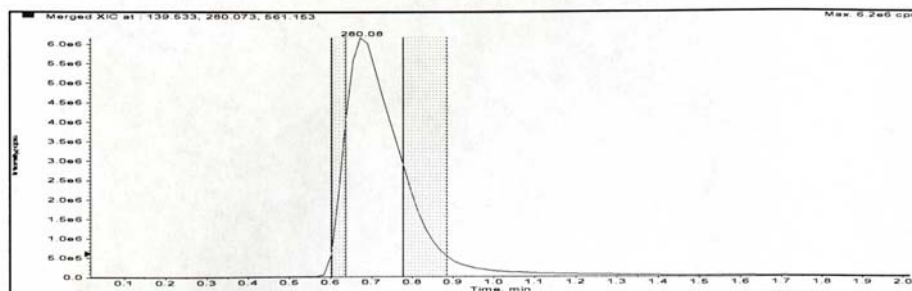

Merged XIC, Period#: 1 Experiment#: 1

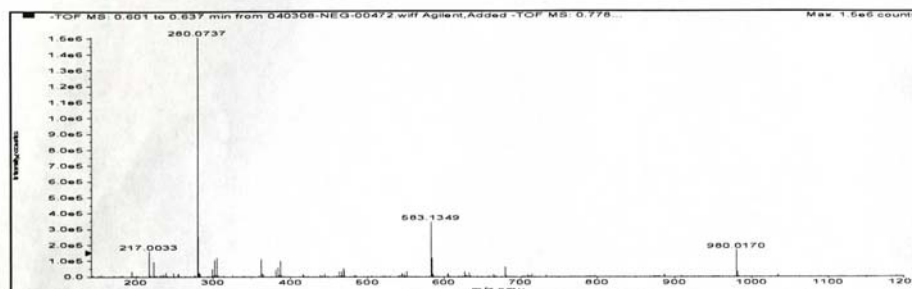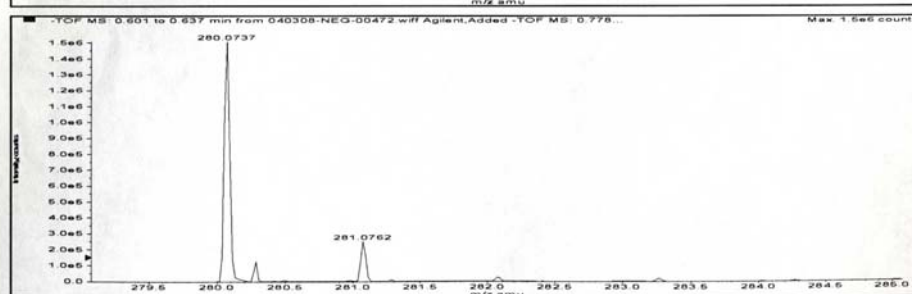

| Formula    | Compound name | Mass      | Peak RT (min) | Peak area  | Description |
|------------|---------------|-----------|---------------|------------|-------------|
| C15H11N3O3 | --            | 281.08004 | 0.68          | 5.61528 E7 | --          |

| Species | Abundance (counts) | Ion Mass  | Measured Mass | Error (mDa) | Error (ppm) | Ret. Time Error (min) |
|---------|--------------------|-----------|---------------|-------------|-------------|-----------------------|
| [M-H]-  | 1516453.47         | 280.07276 | 280.07368     | 0.91435     | 3.26        | --                    |

Tuesday, March 04, 2008

15:30:37 PM

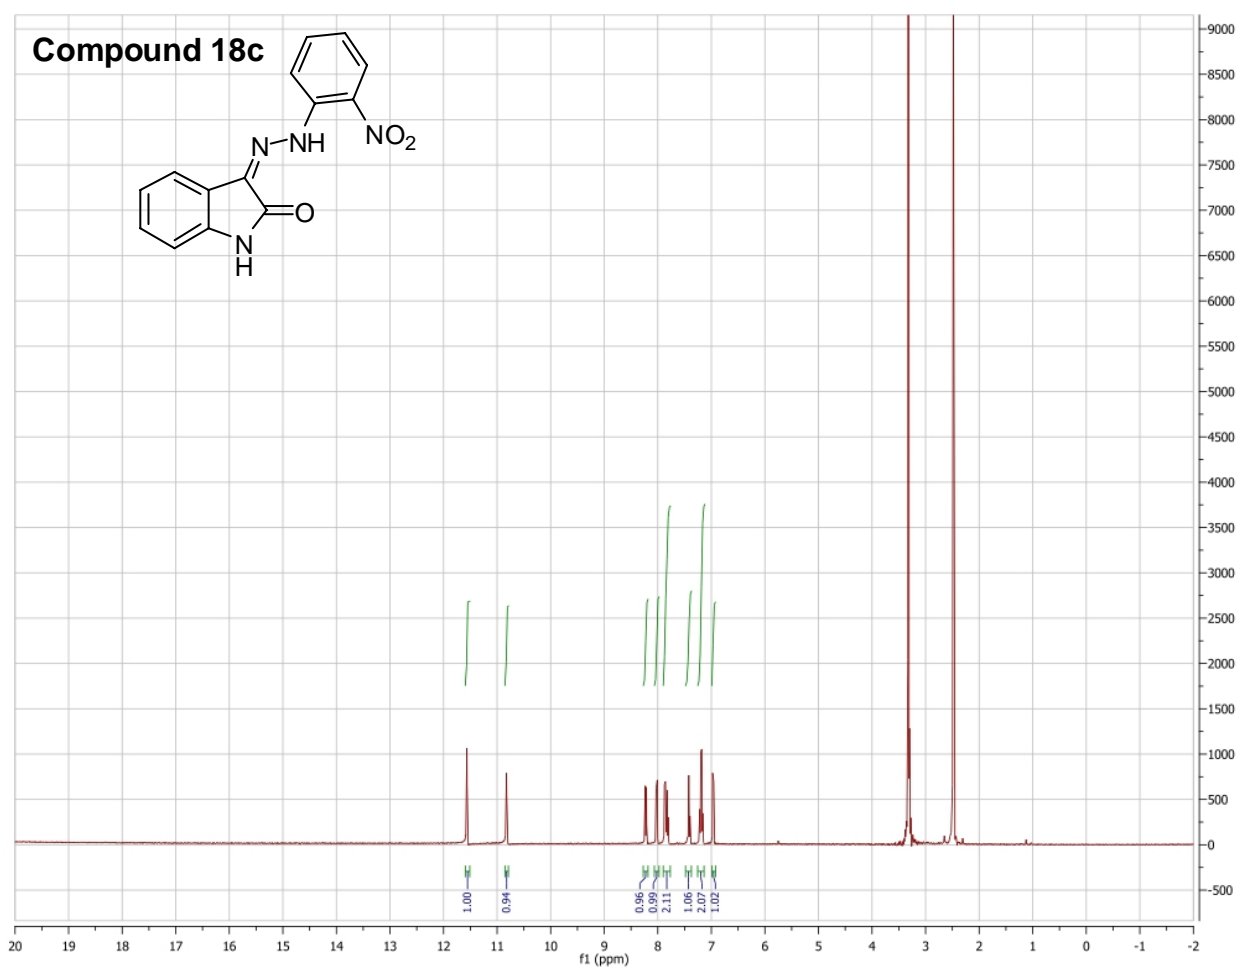

Expansion of the  $^1\text{H}$  NMR ( $\text{DMSO}-d_6$ ) spectrum of 18c ( $\delta$  6.8 – 8.4 ppm)

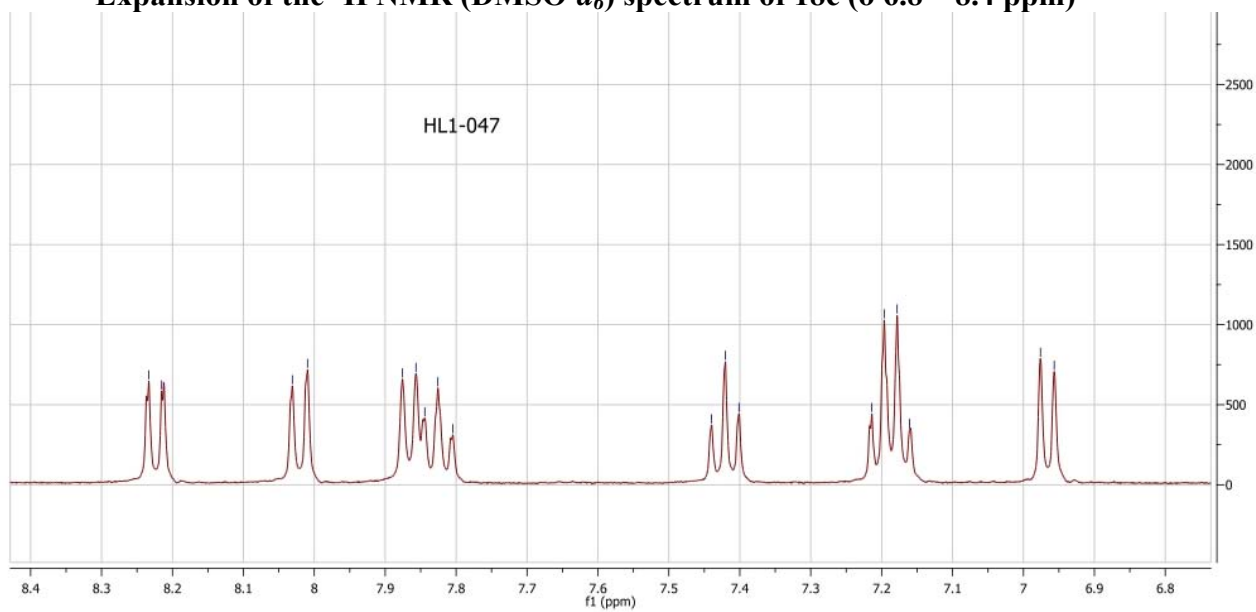

## HRMS 18c

## Empirical Formula Confirmation Report

Page 1 of 1

Sample Name: HL1-047 Sample Location: P1-F-04 Sample ID: HL1-047 Operator: EasyAccess  
Data File Name: D:\PE Sciex Data\Projects\chemist\02-08\Data\260208-ESI\_POS2-00419.wiff Acq Time: February 26 2008 04:32:37 PM  
Method: D:\TOF\_Data\damethods\EASY ACCESS2.ANM\efc.xml

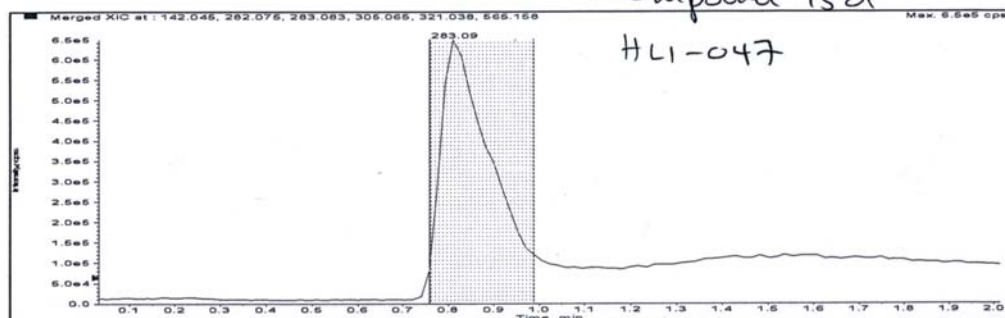

Merged XIC, Period# : 1 Experiment# : 1

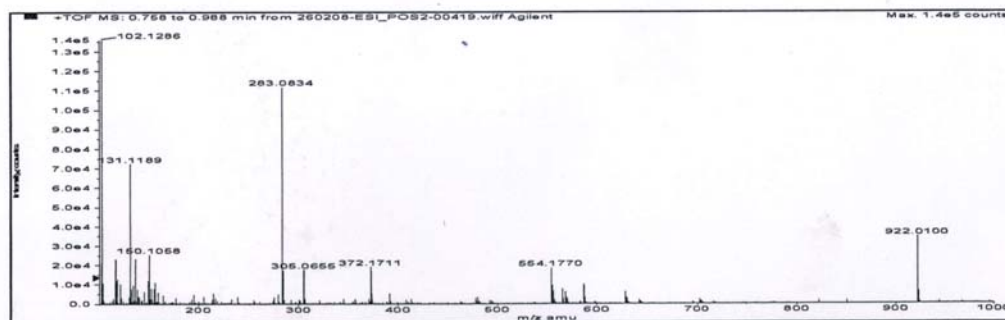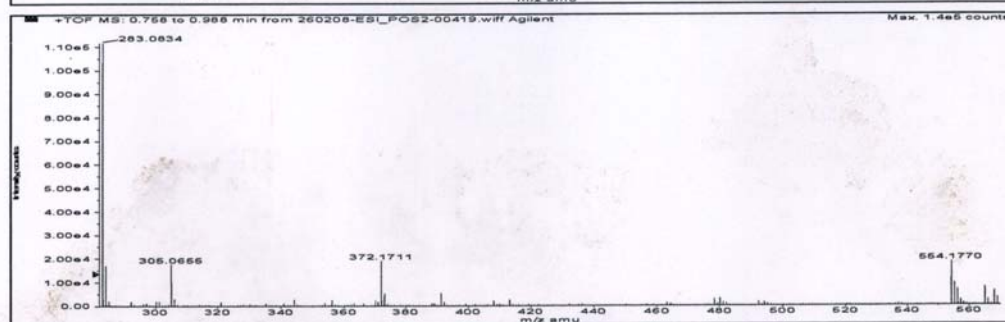

| Formula    | Compound name | Mass      | Peak RT (min) | Peak area  | Description |
|------------|---------------|-----------|---------------|------------|-------------|
| C14H10N4O3 | --            | 282.07529 | 0.82          | 4.79804 E6 | --          |

| Species             | Abundance (counts) | Ion Mass  | Measured Mass | Error (mDa) | Error (ppm) | Ret. Time Error (min) |
|---------------------|--------------------|-----------|---------------|-------------|-------------|-----------------------|
| [M+H] <sup>+</sup>  | 118777.78          | 283.08257 | 283.08339     | 0.82447     | 2.91        | --                    |
| [M+Na] <sup>+</sup> | 19002.25           | 305.06451 | 305.06553     | 1.02053     | 3.35        | --                    |
| [M+K] <sup>+</sup>  | 1849.26            | 321.03845 | 321.03889     | 0.44339     | 1.38        | --                    |
| [2M+H] <sup>+</sup> | 7703.38            | 565.15786 | 565.15836     | 0.50136     | 0.89        | --                    |

Tuesday, February 26, 2008

16:34:50 PM

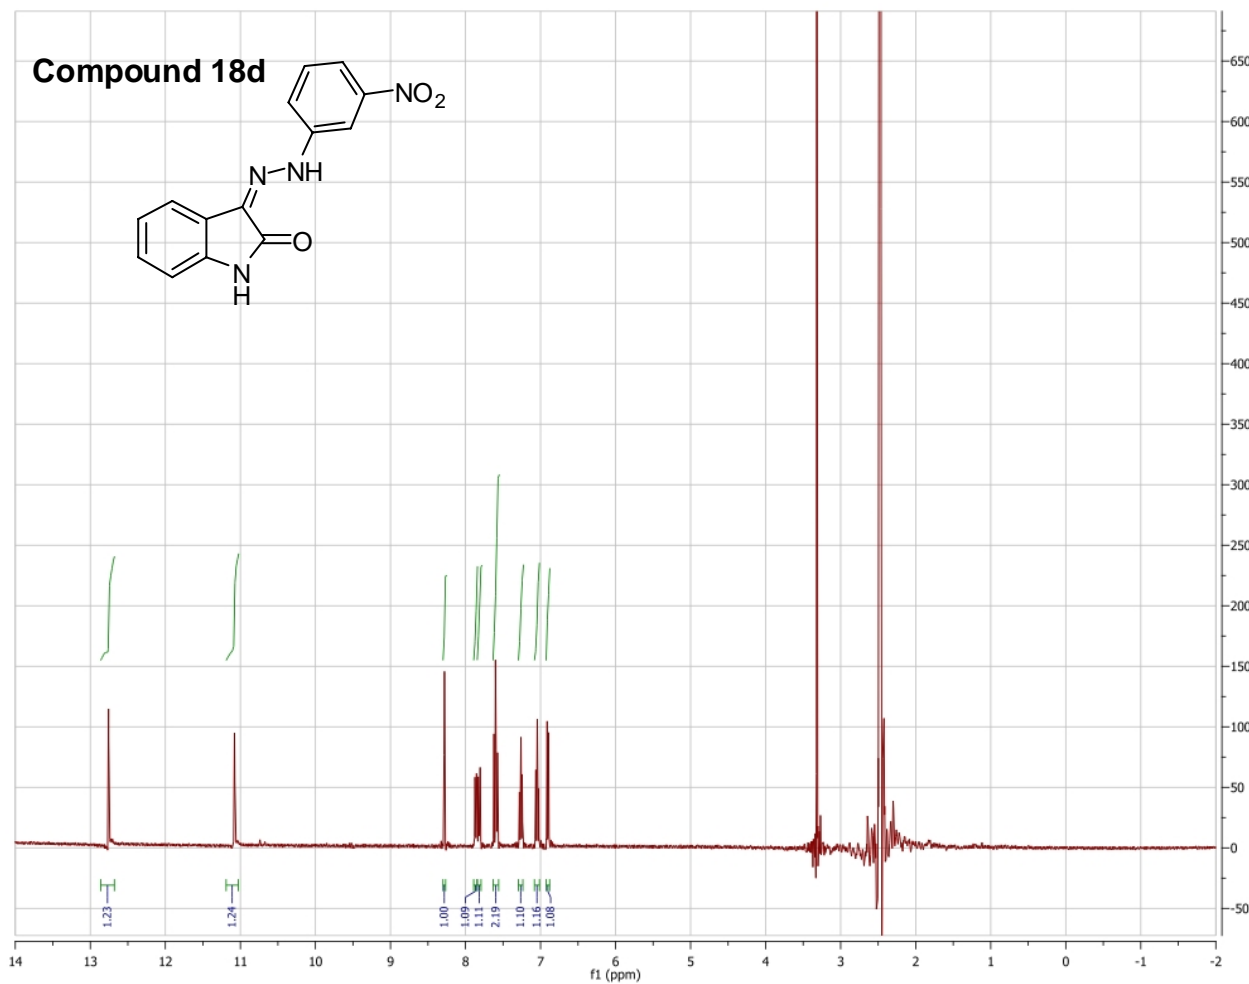

Expansion of the  $^1\text{H}$  NMR (DMSO- $d_6$ ) spectrum of 18d ( $\delta$  6.8 – 8.3 ppm)

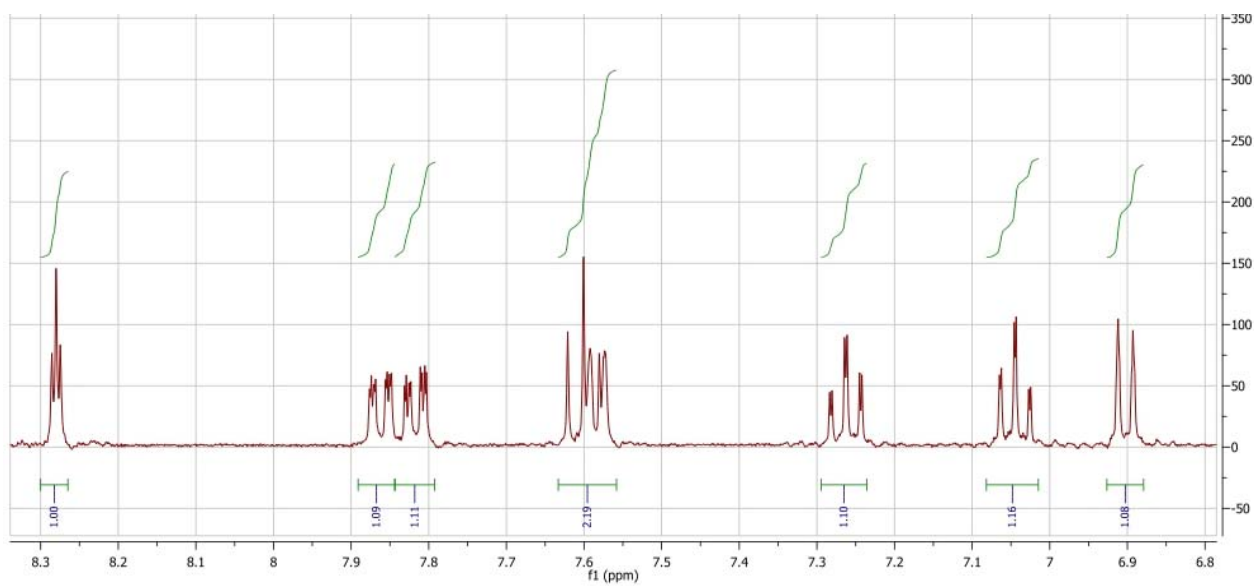

## HRMS 18d

## Empirical Formula Confirmation Report

Page 1 of 1

Sample Name: HL1-050-2 Sample Location: P1-F-06 Sample Id: HL1-050-2 Operator: EasyAccess  
Data File Name: D:\PE Sciex Data\Projects\chemist02-08\Data\260208-ESI\_POS2-00421.wiff Acq Time: February 26 2008, 04:46:29 PM  
Method: D:\TOF\_Data\damethods\EASY ACCESS2.ANM\efc.xml

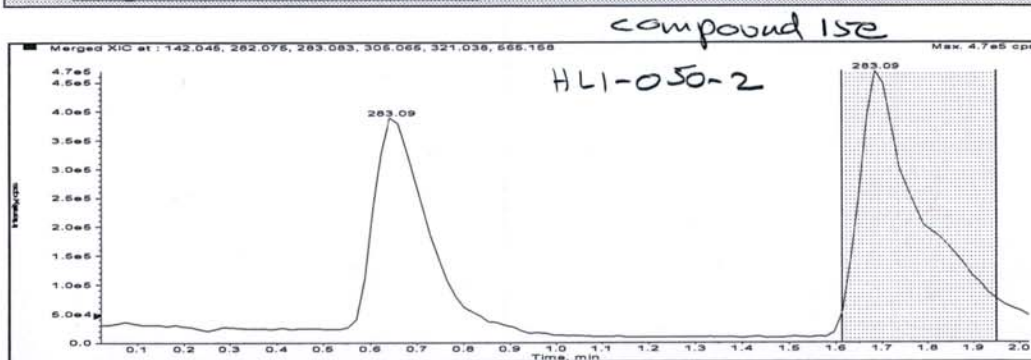

Merged XIC, Period#: 1 Experiment#: 1

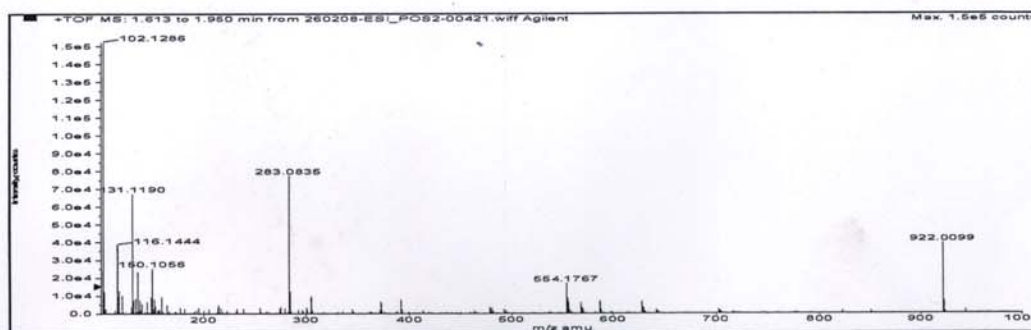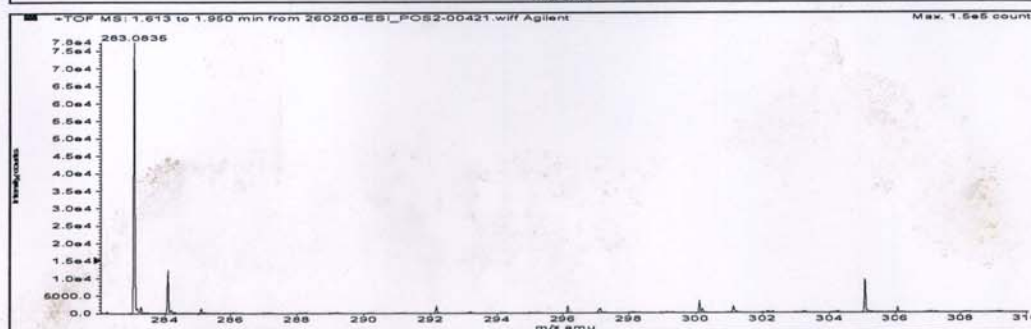

| Formula    | Compound name | Mass      | Peak RT (min) | Peak area  | Description |
|------------|---------------|-----------|---------------|------------|-------------|
| C14H10N4O3 | --            | 282.07529 | 1.69          | 4.11749 E6 | --          |

| Species             | Abundance (counts) | Ion Mass  | Measured Mass | Error (mDa) | Error (ppm) | Ret. Time Error (min) |
|---------------------|--------------------|-----------|---------------|-------------|-------------|-----------------------|
| [M+H] <sup>+</sup>  | 82311.47           | 283.08257 | 283.08349     | 0.92122     | 3.25        | --                    |
| [M+Na] <sup>+</sup> | 10235.98           | 305.06451 | 305.06544     | 0.92416     | 3.03        | --                    |

Tuesday, February 26, 2008

16:48:44 PM

**Computer Docking.** Computer docking was performed with the X-ray crystal structure of human Shp2 (PDB identification code: 2SHP)<sup>1</sup> and human Shp1 (PDB identification code: 1FPR)<sup>2</sup> using the GLIDE v4.0 (Grid-Based Ligand Docking with Energetics, from Schrödinger, L.L.C.) program.<sup>3,4</sup> The N-SH2 domain of Shp2, which blocks the catalytic site, was removed from the 3D structure prior to the computer docking analysis. The optimal binding geometry for each model was obtained from the GLIDE docking which relies upon Monte Carlo sampling techniques coupled with energy minimization.

## References

1. Hof, P.; Pluskey, S.; Dhe-Paganon, S.; Eck, M. J.; Shoelson, S. E., Crystal structure of the tyrosine phosphatase SHP-2. *Cell* **1998**, 92, 441-50.
2. Yang, J.; Cheng, Z.; Niu, T.; Liang, X.; Zhao, Z. J.; Zhou, G. W., Structural basis for substrate specificity of protein-tyrosine phosphatase SHP-1. *J. Biol. Chem.* **2000**, 275, 4066-4071.
3. Friesner, R. A.; Banks, J. L.; Murphy, R. B.; Halgren, T. A.; Klicic, J. J.; Mainz, D. T.; Repasky, M. P.; Knoll, E. H.; Shelley, M.; Perry, J. K.; Shaw, D. E.; Francis, P.; Shenkin, P. S., Glide: A new approach for rapid, accurate docking and scoring. 1. Method and assessment of docking accuracy. *J. Med. Chem.* **2004**, 47, 1739-1749.
4. Halgren, T. A.; Murphy, R. B.; Friesner, R. A.; Beard, H. S.; Frye, L. L.; Pollard, W. T.; Banks, J. L., Glide: A new approach for rapid, accurate docking and scoring. 2. Enrichment factors in database screening. *J. Med. Chem.* **2004**, 47, 1750-1759.
